# Supplementary material for: Ultrasound-assisted condensation cyclization reaction: fast synthesis of quinazolinones from o-aminobenzamides and aldehydes under ambient conditions
Source: Royal Society of Chemistry journal article supplement (doi:10.1039/d4re00479e), 2024-12-09

## Supplementary Information

# Ultrasound-assisted condensation cyclization reaction: fast synthesis of quinazolinones from *o*-aminobenzamides and aldehydes under ambient conditions

Xuerou Chen, Siqi Li, Shilong Sun, and Wuji Sun\*

School of Pharmacy, North China University of Science and Technology, Tangshan, 063210, China

\*Corresponding author: sunwuji@yeah.net

## Tables of contents

|                                                         |     |
|---------------------------------------------------------|-----|
| 1. General Information                                  | S2  |
| 2. General procedure for synthesis of products 3        | S2  |
| 3. References                                           | S16 |
| 3. Structure characterization spectra of quinazolinones | S17 |

## General Information

Commercially available reagents were purchased and used without further purification, unless otherwise stated. For the ultrasound irradiation, ultrasound apparatus from KQ3200DV ultrasonic cleaner with a frequency of 40 kHz and an output power of 150 W were used. The reactions were monitored by thin layer chromatography (TLC) on 0.25 mm silica gel plates (GF254) and visualized under UV light. Silica gel (200-300 mesh) was used for flash column chromatography. Nuclear magnetic resonance spectra ( $^1\text{H}$  NMR and  $^{13}\text{C}$  NMR) were recorded on a Bruker Avance 400 spectrometer at 400 MHz and 100 MHz in  $\text{DMSO}-d_6$ , and chemical shifts were reported as parts per million (ppm). The resonance patterns were annotated as s (singlet), d (doublet), t (triplet) and m (multiplet). The coupling constants ( $J$ ) were reported in Hertz (Hz). HRMS data were recorded using an Agilent Accurate-Mass Q-TOF LC/MS 6520 instrument with an ESI source.

## General procedure for synthesis of products 3

A mixture of *o*-aminobenzamides **1** (1.0 mmol) and aldehydes **2** (1.0 mmol) was prepared in a round bottom flask. The mixture was dissolved in  $\text{CH}_3\text{OH}$  (10 mL) and DDQ (1.2 mmol) was loaded into the round bottom flask. Afterwards, the reaction mixture was subjected to ultrasound irradiation at 60 W for 15 minutes at room temperature. After completion of the reaction, the organic solvent was evaporated. The obtained mixture was quenched by the aqueous sodium sulfite solution, extracted with ethyl acetate (25ml  $\times$ 3). The combined organic layer was dried with anhydrous  $\text{MgSO}_4$ , and then remove the solvent. The crude product was purified by silica gel column chromatography to give the desired product **3**.

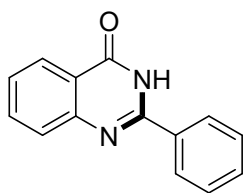

**2-Phenylquinazolin-4(3H)-one (3aa).** White solid; 90% yield; mp 229-231°C (lit. mp 230-232°C)<sup>1</sup>; Rf = 0.48 (petroleum ether/ethyl acetate = 2:1); <sup>1</sup>H NMR (400 MHz, DMSO-*d*<sub>6</sub>): δ (ppm) 12.56 (s, 1H), 8.21-8.16 (m, 3H), 7.86-7.83 (m, 1H), 7.76 (dd, *J* = 8.2, 1.2 Hz, 1H), 7.62-7.52 (m, 4H); <sup>13</sup>C NMR (100 MHz, DMSO-*d*<sub>6</sub>): δ (ppm) 162.70, 152.78, 149.22, 135.08, 133.20, 131.86, 129.07, 128.24, 127.99, 127.06, 126.32, 121.47; HRMS (ESI) *m/z*: calcd for C<sub>14</sub>H<sub>11</sub>N<sub>2</sub>O [M + H]<sup>+</sup> 223.0866, found 223.0867.

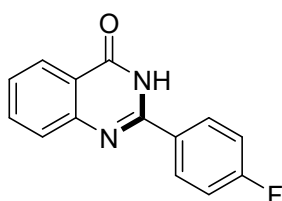

**2-(4-Fluorophenyl)quinazolin-4(3H)-one (3ab).** Yellow solid; 92% yield; mp 285-287°C (lit. mp 284-286°C)<sup>1</sup>; Rf = 0.51 (petroleum ether/ethyl acetate = 2:1); <sup>1</sup>H NMR (400 MHz, DMSO-*d*<sub>6</sub>): δ (ppm) 12.61 (s, 1H), 8.23-8.19 (m, 2H), 8.16 (dd, *J* = 7.9, 1.5 Hz, 1H), 7.87-7.83 (m, 1H), 7.75 (dd, *J* = 8.3, 1.2 Hz, 1H), 7.65-7.62 (m, 2H), 7.56-7.52 (m, 1H); <sup>13</sup>C NMR (100 MHz, DMSO-*d*<sub>6</sub>): δ (ppm) 162.67, 151.86, 149.13, 136.78, 135.15, 132.03, 130.10, 129.17, 127.94, 127.26, 126.35, 121.47; <sup>19</sup>F NMR (376 MHz, DMSO-*d*<sub>6</sub>): δ (ppm) -109.06; HRMS (ESI) *m/z*: calcd for C<sub>14</sub>H<sub>10</sub>FN<sub>2</sub>O [M + H]<sup>+</sup> 241.0772, found 241.0768.

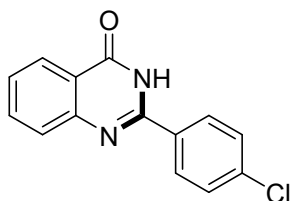

**2-(4-Chlorophenyl)quinazolin-4(3H)-one (3ac).** White solid; 87% yield; Rf = 0.51 (petroleum ether/ethyl acetate = 2:1); mp >300°C (lit. mp >300°C)<sup>1</sup>; <sup>1</sup>H NMR (400 MHz, DMSO-*d*<sub>6</sub>): δ

(ppm) 12.61 (s, 1H), 8.23-8.19 (m, 2H), 8.16 (dd,  $J = 8.0, 1.5$  Hz, 1H), 7.87-7.83 (m, 1H), 7.75 (dd,  $J = 8.3, 1.2$  Hz, 1H), 7.65-7.61 (m, 2H), 7.56-7.52 (m, 1H);  $^{13}\text{C}$  NMR (100 MHz, DMSO- $d_6$ ):  $\delta$  (ppm) 162.63, 151.81, 149.05, 136.77, 135.16, 132.03, 130.10, 129.16, 128.00, 127.26, 126.34, 121.49; HRMS (ESI)  $m/z$ : calcd for  $\text{C}_{14}\text{H}_{10}\text{ClN}_2\text{O}$  [ $\text{M} + \text{H}$ ] $^+$  257.0476, found 257.0479.

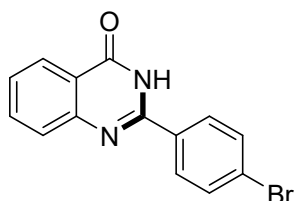

**2-(4-Bromophenyl)quinazolin-4(3H)-one (3ad).** Yellow solid; 91% yield; mp 292-293°C (lit. mp 292-294°C)<sup>1</sup>;  $R_f = 0.48$  (petroleum ether/ethyl acetate = 2:1);  $^1\text{H}$  NMR (400 MHz, DMSO- $d_6$ ):  $\delta$  (ppm) 12.61 (s, 1H), 8.17-8.12 (m, 3H), 7.87-7.83 (m, 1H), 7.79-7.74 (m, 3H), 7.56-7.52 (m, 1H);  $^{13}\text{C}$  NMR (100 MHz, DMSO- $d_6$ ):  $\delta$  (ppm) 162.62, 151.94, 149.05, 135.16, 132.40, 132.10, 130.28, 128.01, 127.28, 126.35, 125.70, 121.50; HRMS (ESI)  $m/z$ : calcd for  $\text{C}_{14}\text{H}_{10}\text{BrN}_2\text{O}$  [ $\text{M} + \text{H}$ ] $^+$  300.9971, found 300.9969.

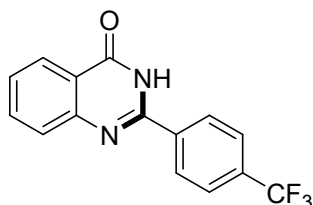

**2-(4-(Trifluoromethyl)phenyl)quinazolin-4(3H)-one (3ae):** White solid; 91% yield; mp 280-282°C (lit. mp 284-286°C)<sup>2</sup>;  $R_f = 0.55$  (petroleum ether/ethyl acetate = 2:1);  $^1\text{H}$  NMR (400 MHz, DMSO- $d_6$ ):  $\delta$  (ppm) 12.76 (s, 1H), 8.38 (d,  $J = 8.1$  Hz, 2H), 8.19 (dd,  $J = 8.0, 1.6$  Hz, 1H), 7.93 (d,  $J = 8.2$  Hz, 2H), 7.87 (td,  $J = 7.6, 1.6$  Hz, 1H), 7.79 (d,  $J = 8.1$  Hz, 1H), 7.57 (t,  $J = 7.5$  Hz, 1H);  $^{13}\text{C}$  NMR (100 MHz, DMSO- $d_6$ ):  $\delta$  (ppm) 162.59, 151.66, 148.91, 137.09, 135.21, 131.74, 131.43, 129.21, 128.16, 127.59, 126.37, 125.91, 121.68;  $^{19}\text{F}$  NMR (376 MHz, DMSO- $d_6$ ):  $\delta$  (ppm) -61.34; HRMS (ESI)  $m/z$ : calcd for  $\text{C}_{15}\text{H}_{10}\text{F}_3\text{N}_2\text{O}$  [ $\text{M} + \text{H}$ ] $^+$  291.0669, found 291.0667.

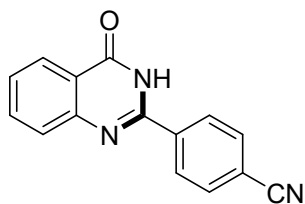

**2-(4-Cyanophenyl)quinazolin-4(3H)-one (3af):** White solid; 88% yield; mp > 300°C (lit. mp > 300°C)<sup>3</sup>; Rf = 0.47 (petroleum ether/ethyl acetate = 1:1); <sup>1</sup>H NMR (400 MHz, DMSO-*d*<sub>6</sub>): δ (ppm) 12.75 (s, 1H), 8.36-8.33 (m, 2H), 8.18 (dd, *J* = 8.0, 1.6 Hz, 1H), 8.06-8.03 (m, 2H), 7.88 (ddd, *J* = 8.5, 7.1, 1.6 Hz, 1H), 7.80-7.77 (m, 1H), 7.58 (ddd, *J* = 8.2, 7.1, 1.3 Hz, 1H); <sup>13</sup>C NMR (100 MHz, DMSO-*d*<sub>6</sub>): δ (ppm) 162.54, 137.37, 135.26, 133.01, 129.11, 127.74, 126.39, 121.68, 118.82, 114.07; HRMS (ESI) *m/z*: calcd for C<sub>15</sub>H<sub>10</sub>N<sub>3</sub>O [M + H]<sup>+</sup> 248.0749, found 248.0746.

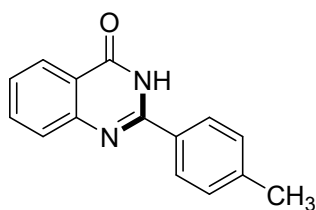

**2-(4-Methylphenyl)quinazolin-4(3H)-one (3ag):** White solid; 80% yield; mp 240-242°C (lit. mp 241-243°C)<sup>2</sup>; Rf = 0.48 (petroleum ether/ethyl acetate = 2:1); <sup>1</sup>H NMR (400 MHz, DMSO-*d*<sub>6</sub>): δ (ppm) 12.47 (s, 1H), 8.15 (dd, *J* = 7.9, 1.5 Hz, 1H), 8.11 (d, *J* = 8.3 Hz, 2H), 7.86-7.81 (m, 1H), 7.73 (dd, *J* = 8.3, 1.2 Hz, 1H), 7.53-7.49 (m, 1H), 7.36 (d, *J* = 8.3 Hz, 2H), 2.40 (s, 3H); <sup>13</sup>C NMR (100 MHz, DMSO-*d*<sub>6</sub>): δ (ppm) 162.37, 152.31, 148.83, 141.52, 134.63, 129.92, 129.25, 127.73, 127.42, 126.45, 125.89, 120.91, 21.04; HRMS (ESI) *m/z*: calcd for C<sub>15</sub>H<sub>13</sub>N<sub>2</sub>O [M + H]<sup>+</sup> 237.1022, found 237.1020.

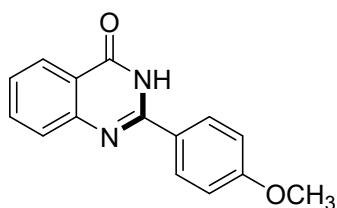

**2-(4-Methoxyphenyl)quinazolin-4(3H)-one (3ah):** White solid; 82% yield; mp 228-230°C (lit. mp

230-232°C)<sup>4</sup>; Rf = 0.57 (petroleum ether/ethyl acetate = 1:1); <sup>1</sup>H NMR (400 MHz, DMSO-*d*<sub>6</sub>): δ (ppm) 12.42 (s, 1H), 8.22-8.18 (m, 2H), 8.14 (dd, *J* = 8.0, 1.5 Hz, 1H), 7.84-7.80 (m, 1H), 7.71 (dd, *J* = 8.4, 1.2 Hz, 1H), 7.51-7.47 (m, 1H), 7.11-7.08 (m, 2H), 3.86 (s, 3H); <sup>13</sup>C NMR (100 MHz, DMSO-*d*<sub>6</sub>): δ (ppm) 162.21, 161.77, 151.76, 148.85, 134.46, 129.36, 127.20, 126.04, 125.73, 124.70, 120.60, 113.90, 55.37; HRMS (ESI) *m/z*: calcd for C<sub>15</sub>H<sub>13</sub>N<sub>2</sub>O<sub>2</sub> [M + H]<sup>+</sup> 253.0972, found 253.0976.

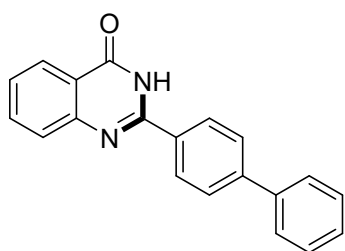

**2-(Biphenyl-4-yl)quinazolin-4(3H)-one (3ai):** White solid; 85% yield; mp 265-267°C (lit. mp 265-267°C)<sup>5</sup>; Rf = 0.46 (petroleum ether/ethyl acetate = 1:1); <sup>1</sup>H NMR (400 MHz, DMSO-*d*<sub>6</sub>): δ (ppm) 12.59 (s, 1H), 8.32-8.30 (m, 2H), 8.17 (d, *J* = 7.9 Hz, 1H), 7.87 (dd, *J* = 8.5, 2.2 Hz, 3H), 7.80-7.76 (m, 3H), 7.52 (t, *J* = 7.4 Hz, 3H), 7.45-7.43 (m, 1H); <sup>13</sup>C NMR (100 MHz, DMSO-*d*<sub>6</sub>): δ (ppm) 162.75, 152.44, 149.23, 143.34, 139.44, 135.11, 132.04, 129.56, 128.87, 128.67, 127.33, 127.24, 127.07, 126.36, 121.46; HRMS (ESI) *m/z*: calcd for C<sub>20</sub>H<sub>15</sub>N<sub>2</sub>O [M + H]<sup>+</sup> 299.1110, found 299.1106.

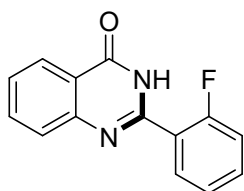

**2-(2-Fluorophenyl)quinazolin-4(3H)-one (3aj):** White solid; 90% yield; mp 163-164°C (lit. mp 162-163°C)<sup>6</sup>; Rf = 0.40 (petroleum ether/ethyl acetate = 2:1) <sup>1</sup>H NMR (400 MHz, DMSO-*d*<sub>6</sub>): δ (ppm) 12.59 (s, 1H), 8.19 (dd, *J* = 7.9, 1.6 Hz, 1H), 7.87 (td, *J* = 7.6, 1.6 Hz, 1H), 7.81 (td, *J* = 7.6,

1.7 Hz, 1H), 7.75 (d,  $J = 8.1$  Hz, 1H), 7.67-7.61 (m, 1H), 7.60 – 7.56 (m, 1H), 7.42 (d,  $J = 10.6$  Hz, 1H), 7.38 (d,  $J = 7.3$  Hz, 1H);  $^{13}\text{C}$  NMR (100 MHz,  $\text{DMSO-}d_6$ ):  $\delta$  (ppm) 161.96, 150.42, 149.16, 135.07, 133.27, 131.50, 127.98, 127.50, 126.33, 125.10, 122.82, 121.59, 116.75;  $^{19}\text{F}$  NMR (376 MHz,  $\text{DMSO-}d_6$ ):  $\delta$  (ppm) -114.65; HRMS (ESI)  $m/z$ : calcd for  $\text{C}_{14}\text{H}_9\text{FN}_2\text{O}$   $[\text{M} + \text{H}]^+$  241.0770, found 241.0769.

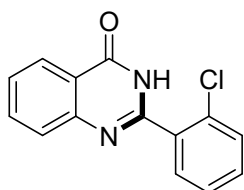

**2-(2-Chlorophenyl)quinazolin-4(3H)-one (3ak):** White solid; 86% yield; mp 194-196°C (lit. mp 196-197°C)<sup>7</sup>;  $R_f = 0.58$  (petroleum ether/ethyl acetate = 1:1);  $^1\text{H}$  NMR (400 MHz,  $\text{DMSO-}d_6$ ):  $\delta$  (ppm) 12.65 (s, 1H), 8.19 (d,  $J = 7.9$  Hz, 1H), 7.87 (t,  $J = 7.6$  Hz, 1H), 7.72 (d,  $J = 8.1$  Hz, 1H), 7.69 (dd,  $J = 7.5, 1.6$  Hz, 1H), 7.63 (d,  $J = 7.9$  Hz, 1H), 7.58 (t,  $J = 7.6$  Hz, 2H), 7.51 (t,  $J = 7.4$  Hz, 1H);  $^{13}\text{C}$  NMR (100 MHz,  $\text{DMSO-}d_6$ ):  $\delta$  (ppm) 161.90, 152.74, 149.04, 135.06, 134.29, 132.09, 131.96, 131.35, 130.07, 127.94, 127.70, 127.54, 126.32, 121.71; HRMS (ESI)  $m/z$ : calcd for  $\text{C}_{14}\text{H}_{10}\text{ClN}_2\text{O}$   $[\text{M} + \text{H}]^+$  257.0478, found 257.0475.

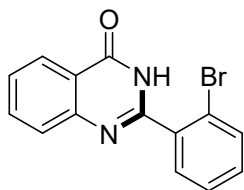

**2-(2-Bromophenyl)quinazolin-4(3H)-one (3al):** White solid; 91% yield; mp 174-176°C (lit. mp 174-176°C)<sup>4</sup>;  $R_f = 0.32$  (petroleum ether/ethyl acetate = 2:1);  $^1\text{H}$  NMR (400 MHz,  $\text{DMSO-}d_6$ ):  $\delta$  (ppm) 12.62 (s, 1H), 8.18 (dd,  $J = 7.9, 1.6$  Hz, 1H), 7.88-7.84 (m, 1H), 7.78 (dd,  $J = 7.9, 1.3$  Hz, 1H), 7.71 (dd,  $J = 8.3, 1.1$  Hz, 1H), 7.65 (dd,  $J = 7.5, 1.9$  Hz, 1H), 7.60-7.46 (m, 3H);  $^{13}\text{C}$  NMR (100 MHz,  $\text{DMSO-}d_6$ ):  $\delta$  (ppm) 161.89, 153.81, 149.03, 136.34, 135.06, 133.11, 132.14, 131.25, 128.15,

127.95, 127.52, 126.31, 121.74, 121.44; HRMS (ESI)  $m/z$ : calcd for  $C_{14}H_{10}BrN_2O$   $[M + H]^+$   
300.9971, found 300.9972.

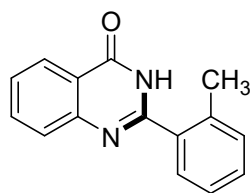

**2-(2-Methylphenyl)quinazolin-4(3H)-one (3am):** White solid; 84% yield; mp 214-215°C (lit. mp 216-218°C)<sup>2</sup>;  $R_f$  = 0.40 (petroleum ether/ethyl acetate = 2:1);  $^1H$  NMR (400 MHz,  $DMSO-d_6$ ):  $\delta$  (ppm) 12.44 (s, 1H), 8.17 (dd,  $J$  = 7.9, 1.6 Hz, 1H), 7.86-7.82 (m, 1H), 7.69 (dd,  $J$  = 8.3, 1.2 Hz, 1H), 7.57-7.50 (m, 2H), 7.44 (td,  $J$  = 7.4, 1.5 Hz, 1H), 7.36-7.31 (m, 2H), 2.39 (s, 3H);  $^{13}C$  NMR (100 MHz,  $DMSO-d_6$ ):  $\delta$  (ppm) 161.66, 154.26, 148.62, 135.99, 134.37, 134.12, 130.42, 129.78, 129.02, 127.26, 126.53, 125.67, 125.58, 120.87, 19.45; HRMS (ESI)  $m/z$ : calcd for  $C_{15}H_{13}N_2O$   $[M + H]^+$  237.1022, found 237.1022.

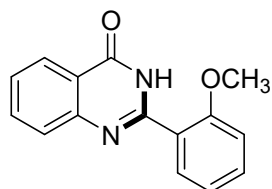

**2-(2-Methoxyphenyl)quinazolin-4(3H)-one (3an):** White solid; 80% yield; mp 200-202°C (lit. mp 200-202°C)<sup>1</sup>;  $R_f$  = 0.48 (petroleum ether/ethyl acetate = 1:1);  $^1H$  NMR (500 MHz,  $DMSO-d_6$ ):  $\delta$  (ppm) 12.11 (s, 1H), 8.16 (dd,  $J$  = 8.0, 1.6 Hz, 1H), 7.86-7.80 (m, 1H), 7.72 (td,  $J$  = 5.9, 3.0 Hz, 2H), 7.58-7.51 (m, 2H), 7.20 (d,  $J$  = 8.4 Hz, 1H), 7.10 (t,  $J$  = 7.5 Hz, 1H), 3.87 (s, 3H);  $^{13}C$  NMR (125 MHz,  $DMSO-d_6$ ):  $\delta$  (ppm) 161.71, 157.62, 152.84, 149.51, 134.89, 132.70, 130.93, 127.86, 127.03, 126.26, 123.14, 121.48, 120.91, 112.35, 56.26; HRMS (ESI)  $m/z$ : calcd for  $C_{15}H_{13}N_2O_2$   $[M + H]^+$  253.0975, found 253.0976.



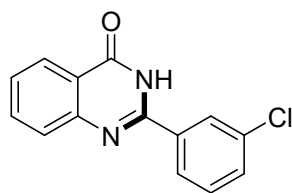

**2-(3-Chlorophenyl)quinazolin-4(3H)-one (3ao):** White solid; 88% yield; mp 253-254°C (lit. mp 252-254°C)<sup>8</sup>; R<sub>f</sub> = 0.51 (petroleum ether/ethyl acetate = 2:1); <sup>1</sup>H NMR (400 MHz, DMSO-*d*<sub>6</sub>): δ (ppm) 12.63 (s, 1H), 8.25 (t, *J* = 1.9 Hz, 1H), 8.16 (tt, *J* = 5.9, 1.4 Hz, 2H), 7.86 (ddd, *J* = 8.5, 7.0, 1.6 Hz, 1H), 7.79-7.76 (m, 1H), 7.68-7.66 (m, 1H), 7.59 (d, *J* = 7.9 Hz, 1H), 7.57-7.54 (m, 1H); <sup>13</sup>C NMR (100 MHz, DMSO-*d*<sub>6</sub>): δ (ppm) 162.57, 151.46, 148.94, 135.18, 133.93, 131.64, 131.01, 128.10, 127.42, 126.90, 126.35, 121.59; HRMS (ESI) *m/z*: calcd for C<sub>14</sub>H<sub>10</sub>ClN<sub>2</sub>O [M + H]<sup>+</sup> 257.0475, found 257.0478

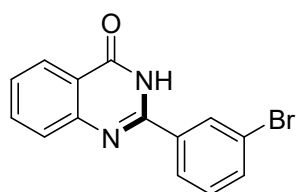

**2-(3-Bromophenyl)quinazolin-4(3H)-one (3ap):** Yellow solid; 89% yield; mp 295-296°C (lit. mp 295-296°C)<sup>7</sup>; R<sub>f</sub> = 0.5 (petroleum ether/ethyl acetate = 2:1); <sup>1</sup>H NMR (400 MHz, DMSO-*d*<sub>6</sub>): δ (ppm) 12.63 (s, 1H), 8.38 (t, *J* = 1.9 Hz, 1H), 8.21-8.15 (m, 2H), 7.88-7.76 (m, 3H), 7.57-7.51 (m, 2H); <sup>13</sup>C NMR (100 MHz, DMSO-*d*<sub>6</sub>): δ (ppm) 161.98, 150.79, 148.36, 134.82, 134.59, 133.94, 130.65, 130.30, 127.52, 126.83, 126.68, 125.77, 121.79, 121.03; HRMS (ESI) *m/z*: calcd for C<sub>14</sub>H<sub>10</sub>BrN<sub>2</sub>O [M + H]<sup>+</sup> 300.9971, found 300.9974.

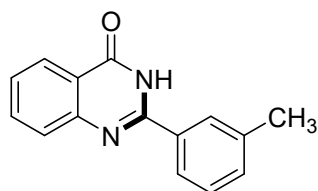

**2-(3-Methylphenyl)quinazolin-4(3H)-one (3aq):** White solid; 83% yield; mp 212-214°C (lit. mp 211-212°C)<sup>9</sup>; R<sub>f</sub> = 0.53 (petroleum ether/ethyl acetate = 2:1); <sup>1</sup>H NMR (400 MHz, DMSO-*d*<sub>6</sub>): δ

(ppm) 12.48 (s, 1H), 8.17 (dd,  $J = 7.9, 1.6$  Hz, 1H), 8.04 (s, 1H), 8.00-7.97 (m, 1H), 7.87-7.82 (m, 1H), 7.75 (d,  $J = 8.1$  Hz, 1H), 7.55-7.51 (m, 1H), 7.46-7.42 (m, 2H), 2.42 (s, 3H);  $^{13}\text{C}$  NMR (100 MHz, DMSO- $d_6$ ):  $\delta$  (ppm) 162.72, 152.90, 149.17, 138.39, 135.05, 133.10, 132.48, 128.97, 128.76, 127.87, 127.00, 126.32, 125.36, 121.43, 21.44; HRMS (ESI)  $m/z$ : calcd for  $\text{C}_{15}\text{H}_{13}\text{N}_2\text{O}$  [ $\text{M} + \text{H}$ ] $^+$  237.1026, found 237.1024.

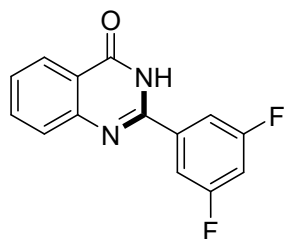

**2-(3,5-Difluorophenyl)quinazolin-4(3H)-one (3ar):** White solid; 89% yield; mp 260-262°C (lit. mp 259-260°C)<sup>5</sup>;  $R_f = 0.51$  (petroleum ether/ethyl acetate = 3:1);  $^1\text{H}$  NMR (400 MHz, DMSO- $d_6$ ):  $\delta$  (ppm) 12.65 (s, 1H), 8.17 (dd,  $J = 7.8, 1.5$  Hz, 1H), 7.94 (d,  $J = 2.1$  Hz, 1H), 7.92-7.91 (m, 1H), 7.87 (ddd,  $J = 8.5, 7.1, 1.5$  Hz, 1H), 7.78 (d,  $J = 8.1$  Hz, 1H), 7.59-7.55 (m, 1H), 7.51 (dt,  $J = 9.1, 2.3$  Hz, 1H);  $^{13}\text{C}$  NMR (100 MHz, DMSO- $d_6$ ):  $\delta$  (ppm) 163.99, 162.49, 161.67, 150.39, 148.63, 136.68, 135.26, 127.71, 126.37, 121.70, 107.28, 107.02;  $^{19}\text{F}$  NMR (376 MHz, DMSO- $d_6$ ):  $\delta$  (ppm) -108.72; HRMS (ESI)  $m/z$ : calcd for  $\text{C}_{14}\text{H}_9\text{F}_2\text{N}_2\text{O}$  [ $\text{M} + \text{H}$ ] $^+$  259.0605, found 259.0608.

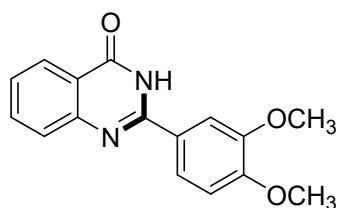

**2-(3,4-Dimethoxyphenyl)quinazolin-4(3H)-one (3as):** White solid; 80% yield; mp 241-242°C (lit. mp 242-243°C)<sup>6</sup>;  $R_f = 0.38$  (petroleum ether/ethyl acetate = 1:1);  $^1\text{H}$  NMR (400 MHz, DMSO- $d_6$ ):  $\delta$  (ppm) 12.44 (s, 1H), 8.14 (dd,  $J = 8.0, 1.5$  Hz, 1H), 7.88 (dd,  $J = 8.5, 2.2$  Hz, 1H), 7.84-7.80 (m, 2H), 7.72 (dd,  $J = 8.3, 1.2$  Hz, 1H), 7.51-7.47 (m, 1H), 7.12 (d,  $J = 8.5$  Hz, 1H), 3.89 (s, 3H), 3.85

(s, 3H);  $^{13}\text{C}$  NMR (100 MHz,  $\text{DMSO-}d_6$ ):  $\delta$  (ppm) 162.26, 151.73, 151.47, 148.81, 148.44, 134.46, 127.23, 126.04, 125.74, 124.63, 121.04, 120.60, 111.25, 110.54, 55.57; HRMS (ESI)  $m/z$ : calcd for  $\text{C}_{16}\text{H}_{15}\text{N}_2\text{O}_3$   $[\text{M} + \text{H}]^+$  253.0972, found 253.0976.

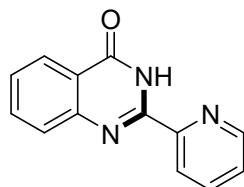

**2-(Pyridin-2-yl)quinazolin-4(3H)-one (3at):** White solid; 88% yield; mp 171-173°C (lit. mp 170-173°C)<sup>2</sup>;  $R_f$  = 0.5 (dichloromethane/methanol = 16:1);  $^1\text{H}$  NMR (400 MHz,  $\text{DMSO-}d_6$ ):  $\delta$  (ppm) 11.78 (s, 1H), 8.75 (d,  $J$  = 4.8 Hz, 1H), 8.44 (d,  $J$  = 7.9 Hz, 1H), 8.19 (d,  $J$  = 7.9 Hz, 1H), 8.06 (t,  $J$  = 7.9 Hz, 1H), 7.88-7.78 (m, 2H), 7.66-7.55 (m, 2H);  $^{13}\text{C}$  NMR (100 MHz,  $\text{DMSO-}d_6$ ):  $\delta$  (ppm) 160.69, 149.87, 148.90, 148.60, 148.32, 137.91, 134.63, 127.62, 127.19, 126.49, 126.01, 122.08, 121.92; HRMS (ESI)  $m/z$ : calcd for  $\text{C}_{13}\text{H}_{10}\text{N}_3\text{O}$   $[\text{M} + \text{H}]^+$  224.0818, found 224.0821.

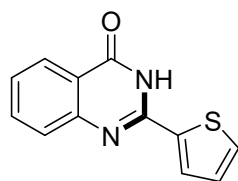

**2-(Thiophene-2-yl)quinazolin-4(3H)-one (3au):** White solid; 81% yield; mp 272-273°C (lit. mp 275-276°C)<sup>1</sup>;  $R_f$  = 0.42 (petroleum ether/ethyl acetate = 2:1);  $^1\text{H}$  NMR (400 MHz,  $\text{DMSO-}d_6$ ):  $\delta$  (ppm) 12.67 (s, 1H), 8.25 (d,  $J$  = 4.4 Hz, 1H), 8.14 (d,  $J$  = 7.8 Hz, 1H), 7.88 (d,  $J$  = 5.0 Hz, 1H), 7.83-7.80 (m, 1H), 7.66 (d,  $J$  = 8.1 Hz, 1H), 7.50 (t,  $J$  = 7.8 Hz, 1H), 7.25 (t,  $J$  = 4.4 Hz, 1H);  $^{13}\text{C}$  NMR (100 MHz,  $\text{DMSO-}d_6$ ):  $\delta$  (ppm) 161.70, 148.56, 147.74, 137.29, 134.61, 132.08, 129.32, 128.43, 126.87, 126.25, 125.90, 120.80; HRMS (ESI)  $m/z$ : calcd for  $\text{C}_{12}\text{H}_9\text{N}_2\text{OS}$   $[\text{M} + \text{H}]^+$  229.0430, found 229.0432.

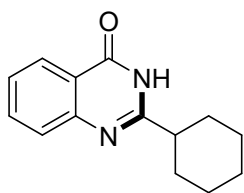

**2-Cyclohexylquinazolin-4(3H)-one (3av):** White solid; 75% yield; mp 229-230°C (lit. mp 229-230°C)<sup>6</sup>; Rf = 0.46 (petroleum ether/ethyl acetate = 2:1); <sup>1</sup>H NMR (400 MHz, DMSO-*d*<sub>6</sub>): δ (ppm) 12.09 (s, 1H), 8.09 (dd, *J* = 8.0, 1.6 Hz, 1H), 7.77 (ddd, *J* = 8.5, 7.1, 1.6 Hz, 1H), 7.61 (d, *J* = 8.2 Hz, 1H), 7.48-7.44 (m, 1H), 2.59 (tt, *J* = 11.7, 3.4 Hz, 1H), 1.92 (dd, *J* = 12.8, 3.3 Hz, 2H), 1.80 (dt, *J* = 12.2, 3.1 Hz, 2H), 1.70 -1.66 (m, 1H), 1.59 (qd, *J* = 12.4, 3.1 Hz, 2H), 1.37-1.21 (m, 3H); <sup>13</sup>C NMR (100 MHz, DMSO-*d*<sub>6</sub>): δ (ppm) 162.39, 161.22, 149.40, 134.66, 127.42, 126.34, 126.12, 121.42, 43.30, 30.66, 25.97, 25.80; HRMS (ESI) *m/z*: calcd for C<sub>14</sub>H<sub>17</sub>N<sub>2</sub>O [M + H]<sup>+</sup> 229.1260, found 229.1263.

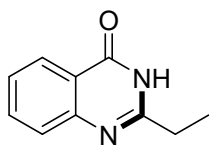

**2-Ethylquinazolin-4(3H)-one (3aw):** White solid; 76% yield; mp 226-227°C (lit. mp 228-230°C)<sup>7</sup>; Rf = 0.38 (petroleum ether/ethyl acetate = 1:1); <sup>1</sup>H NMR (400 MHz, DMSO-*d*<sub>6</sub>): δ (ppm) 12.18 (s, 1H), 8.09 (d, *J* = 7.9 Hz, 1H), 7.78 (t, *J* = 7.7 Hz, 1H), 7.61 (d, *J* = 8.1 Hz, 1H), 7.47 (t, *J* = 7.6 Hz, 1H), 2.63 (q, *J* = 7.5 Hz, 2H), 1.26 (t, *J* = 7.5 Hz, 3H); <sup>13</sup>C NMR (100 MHz, DMSO-*d*<sub>6</sub>): δ (ppm) 161.70, 158.22, 148.86, 134.15, 126.71, 125.81, 125.59, 120.73, 27.74, 11.19; HRMS (ESI) *m/z*: calcd for C<sub>10</sub>H<sub>11</sub>N<sub>2</sub>O [M + H]<sup>+</sup> 175.0866, found 175.0868.

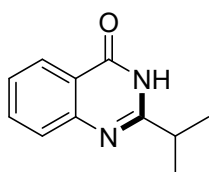

**2-Isopropylquinazolin-4(3H)-one (3ax):** White solid; 78% yield; mp 222-224°C (lit. mp 225-

228°C)<sup>10</sup>; Rf = 0.39 (petroleum ether/ethyl acetate = 2:1); <sup>1</sup>H NMR (400 MHz, DMSO-*d*<sub>6</sub>): δ (ppm) 12.14 (s, 1H), 8.09 (d, *J* = 7.8 Hz, 1H), 7.78 (t, *J* = 7.7 Hz, 1H), 7.62 (d, *J* = 8.2 Hz, 1H), 7.47 (t, *J* = 7.5 Hz, 1H), 2.89 (m, 1H), 1.27 (d, *J* = 6.9 Hz, 6H); <sup>13</sup>C NMR (100 MHz, DMSO-*d*<sub>6</sub>): δ (ppm) 161.83, 161.46, 148.77, 134.16, 126.87, 125.86, 125.56, 120.82, 33.19, 20.27; HRMS (ESI) *m/z*: calcd for C<sub>11</sub>H<sub>13</sub>N<sub>2</sub>O [M + H]<sup>+</sup> 189.1022, found 189.1026.

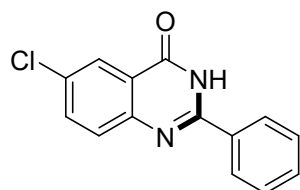

**6-Chloro-2-phenylquinazolin-4(3H)-one (3ba):** White solid; 90% yield; mp 295-296°C (lit. mp 296-297°C)<sup>7</sup>; Rf = 0.56 (petroleum ether/ethyl acetate = 2:1); <sup>1</sup>H NMR (400 MHz, DMSO-*d*<sub>6</sub>): δ (ppm) 12.72 (s, 1H), 8.19-8.16 (m, 2H), 8.09 (d, *J* = 2.5 Hz, 1H), 7.87 (dd, *J* = 8.7, 2.5 Hz, 1H), 7.77 (d, *J* = 8.7 Hz, 1H), 7.61-7.53 (m, 3H); <sup>13</sup>C NMR (100 MHz, DMSO-*d*<sub>6</sub>): δ (ppm) 161.79, 153.33, 147.95, 135.19, 132.94, 132.09, 131.25, 130.22, 129.12, 128.33, 125.36, 122.72; HRMS (ESI) *m/z*: calcd for C<sub>14</sub>H<sub>10</sub>ClN<sub>2</sub>O [M + H]<sup>+</sup> 257.0476, found 257.0478.

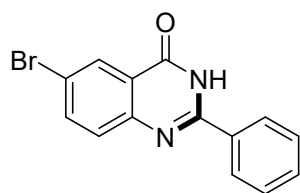

**6-Bromo-2-phenylquinazolin-4(3H)-one (3ca):** Yellow solid; 88% yield; mp 285-287°C (lit. mp 284-286°C)<sup>2</sup>; Rf = 0.54 (petroleum ether/ethyl acetate = 2:1); <sup>1</sup>H NMR (400 MHz, DMSO-*d*<sub>6</sub>): δ (ppm) 12.73 (m, 1H), 8.23 (d, *J* = 2.3 Hz, 1H), 8.19-8.17 (m, 2H), 7.98 (dd, *J* = 8.7, 2.3 Hz, 1H), 7.70 (d, *J* = 8.7 Hz, 1H), 7.61-7.54 (m, 3H); <sup>13</sup>C NMR (100 MHz, DMSO-*d*<sub>6</sub>): δ (ppm) 161.08, 152.83, 147.65, 137.33, 132.35, 131.53, 129.79, 128.54, 127.89, 127.75, 122.51, 118.83; HRMS (ESI) *m/z*: calcd for C<sub>14</sub>H<sub>10</sub>BrN<sub>2</sub>O [M + H]<sup>+</sup> 300.9971, found 300.9973.

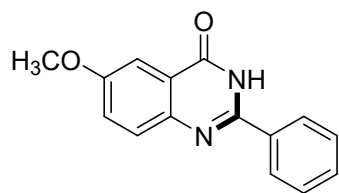

**6-Methoxy-2-phenylquinazolin-4(3H)-one (3da):** White solid; 82% yield; mp 249-251°C (lit. mp 244-246°C)<sup>2</sup>; R<sub>f</sub> = 0.5 (petroleum ether/ethyl acetate = 1:1); <sup>1</sup>H NMR (400 MHz, DMSO-*d*<sub>6</sub>): δ (ppm) 12.53 (s, 1H), 8.17 (d, *J* = 7.3 Hz, 2H), 7.72 (d, *J* = 8.9 Hz, 1H), 7.58-7.53 (m, 4H), 7.46 (dd, *J* = 8.9, 2.9 Hz, 1H), 3.91 (s, 3H); <sup>13</sup>C NMR (100 MHz, DMSO-*d*<sub>6</sub>): δ (ppm) 161.95, 157.65, 149.98, 143.12, 132.70, 130.95, 129.14, 128.49, 127.40, 124.02, 121.70, 105.75, 55.55; HRMS (ESI) *m/z*: calcd for C<sub>15</sub>H<sub>13</sub>N<sub>2</sub>O<sub>2</sub> [M + H]<sup>+</sup> 253.0972, found 253.0975.

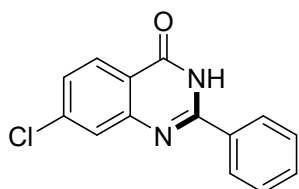

**7-Chloro-2-phenylquinazolin-4(3H)-one (3ea):** White solid; 89% yield; mp 283-285°C (lit. mp 284-286°C)<sup>2</sup>; R<sub>f</sub> = 0.47 (petroleum ether/ethyl acetate = 2:1); <sup>1</sup>H NMR (400 MHz, DMSO-*d*<sub>6</sub>): δ (ppm) 12.68 (s, 1H), 8.19-8.14 (m, 3H), 7.80 (d, *J* = 2.0 Hz, 1H), 7.64-7.54 (m, 4H); <sup>13</sup>C NMR (100 MHz, DMSO-*d*<sub>6</sub>): δ (ppm) 161.57, 153.66, 149.78, 139.07, 132.28, 131.61, 128.54, 127.83, 126.69, 126.49, 119.72; HRMS (ESI) *m/z*: calcd for C<sub>14</sub>H<sub>10</sub>ClN<sub>2</sub>O [M + H]<sup>+</sup> 257.0476, found 257.0475.

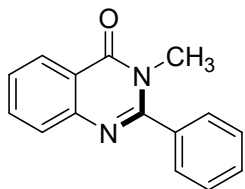

**3-Methyl-2-phenylquinazolin-4(3H)-one (3fa):** White solid; 79% yield; mp 123-125°C (lit. mp 125-127°C)<sup>2</sup>; R<sub>f</sub> = 0.55 (petroleum ether/ethyl acetate = 2:1); <sup>1</sup>H NMR (400 MHz, DMSO-*d*<sub>6</sub>): δ (ppm) 8.19 (dd, *J* = 8.0, 1.5 Hz, 1H), 7.86-7.82 (m, 1H), 7.69-7.67 (m, 3H), 7.58-7.54 (m, 4H), 3.37 (s, 3H); <sup>13</sup>C NMR (100 MHz, DMSO-*d*<sub>6</sub>): δ (ppm) 161.55, 156.05, 146.96, 135.30, 134.26, 129.70,

128.31, 128.17, 127.08, 126.79, 125.99, 120.05, 33.80; HRMS (ESI)  $m/z$ : calcd for  $C_{15}H_{13}N_2O$  [ $M + H$ ]<sup>+</sup> 237.1022, found 237.1025.

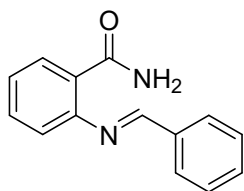

**2-(Benzylideneamino)benzamide (A):** White solid; 45% yield; mp 200-202°C;  $R_f$  = 0.59 (petroleum ether/ethyl acetate = 1:1);  $^1H$  NMR (400 MHz,  $DMSO-d_6$ ):  $\delta$  (ppm) 8.62 (s, 1H), 8.25 (s, 1H), 7.99-7.96 (m, 2H), 7.94 (dd,  $J$  = 7.8, 1.6 Hz, 1H), 7.67 (s, 1H), 7.61-7.54 (m, 4H), 7.38-7.34 (m, 1H), 7.24 (dd,  $J$  = 7.9, 1.2 Hz, 1H);  $^{13}C$  NMR (100 MHz,  $DMSO-d_6$ ):  $\delta$  (ppm) 167.16, 162.23, 149.28, 135.41, 132.06, 131.89, 129.74, 128.92, 127.82, 125.90, 119.30; HRMS (ESI)  $m/z$ : calcd for  $C_{14}H_{13}N_2O$  [ $M + H$ ]<sup>+</sup> 225.1029, found 225.1028.

## References

1. K. Upadhyaya, R. K. Thakur, S. K. Shukla and R. P. Tripathi, *The Journal of Organic Chemistry*, 2016, **81**, 5046-5055.
2. Y. Hu, L. Chen and B. Li, *RSC Advances*, 2016, **6**, 65196-65204.
3. Z. Y. Yu, M. Y. Chen, J. X. He, D. J. Tao, J. J. Yuan, Y. Y. Peng and Z. B. Song, *Molecular Catalysis*, 2017, **434**, 134-139.
4. J. K. Laha, K. S. Satyanarayana Tummalapalli and K. P. Jethava, *Organic&Biomolecular Chemistry*, 2016, **14**, 2473-2479.
5. X. Jiang, T. Tang, J. M. Wang, Z. Chen, Y. M. Zhu and S. J. Ji, *The Journal of Organic Chemistry*, 2014, **79**, 5082-5087.
6. W. Zhao, P. Liu and F. Li, *ChemCatChem*, 2016, **8**, 1523-1530.
7. J. Zhou and J. Fang, *The Journal of Organic Chemistry*, 2011, **76**, 7730-7736.
8. M. Abdullaha, S. Mohammed, M. Ali, A. Kumar, R. A. Vishwakarma and S. B. Bharate, *The Journal of Organic Chemistry*, 2019, **84**, 5129-5140.
9. Y. Feng, Y. Li, G. Cheng, L. Wang and X. Cui, *The Journal of Organic Chemistry*, 2015, **80**, 7099-7107.
10. W. Xu and H. Fu, *The Journal of Organic Chemistry*, 2011, **76**, 3846-3852.



## Structure characterization spectra of quinazolinones

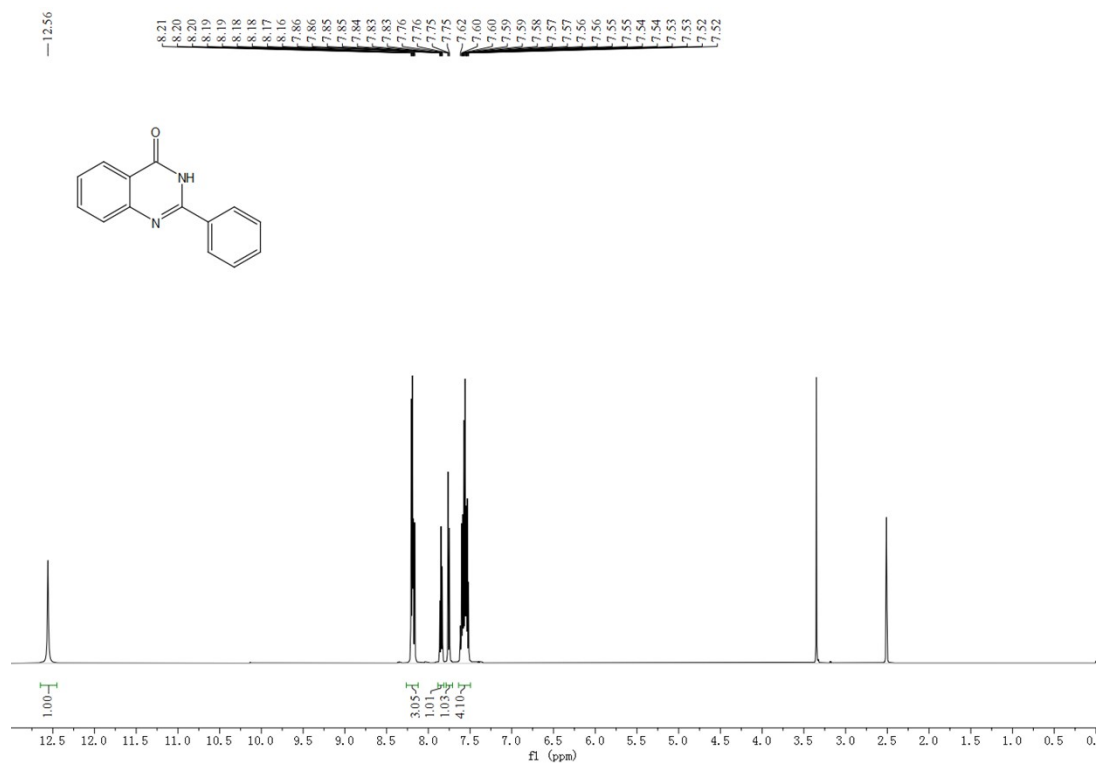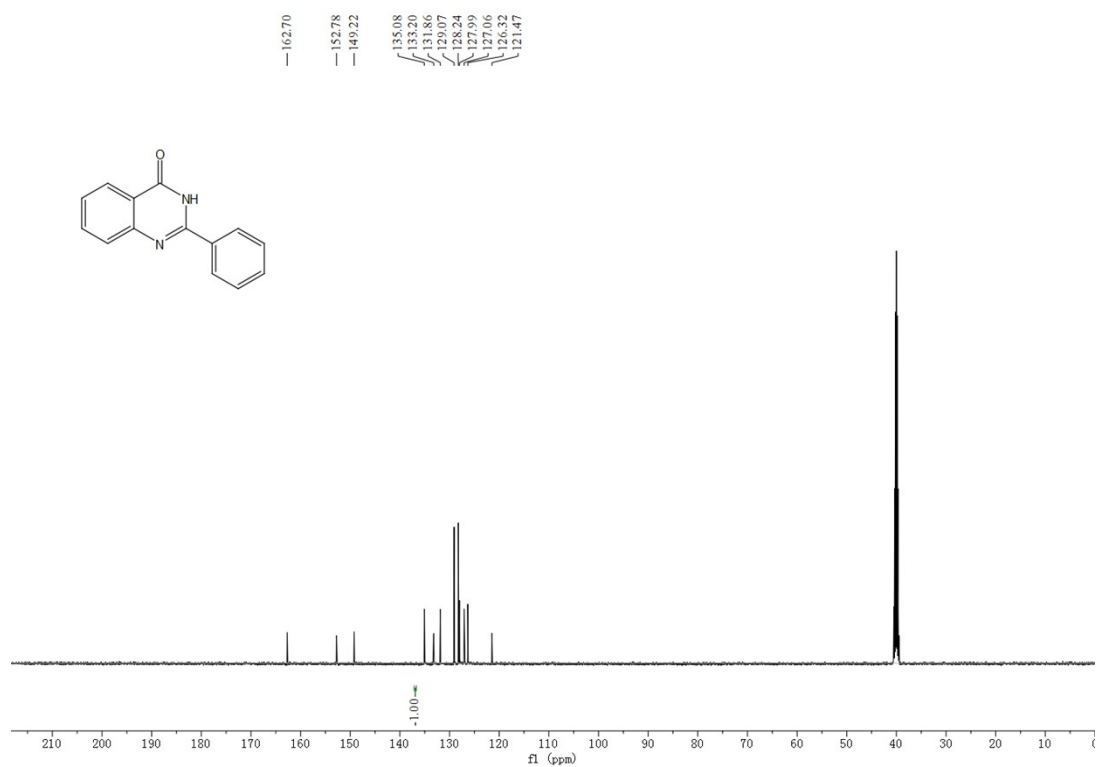

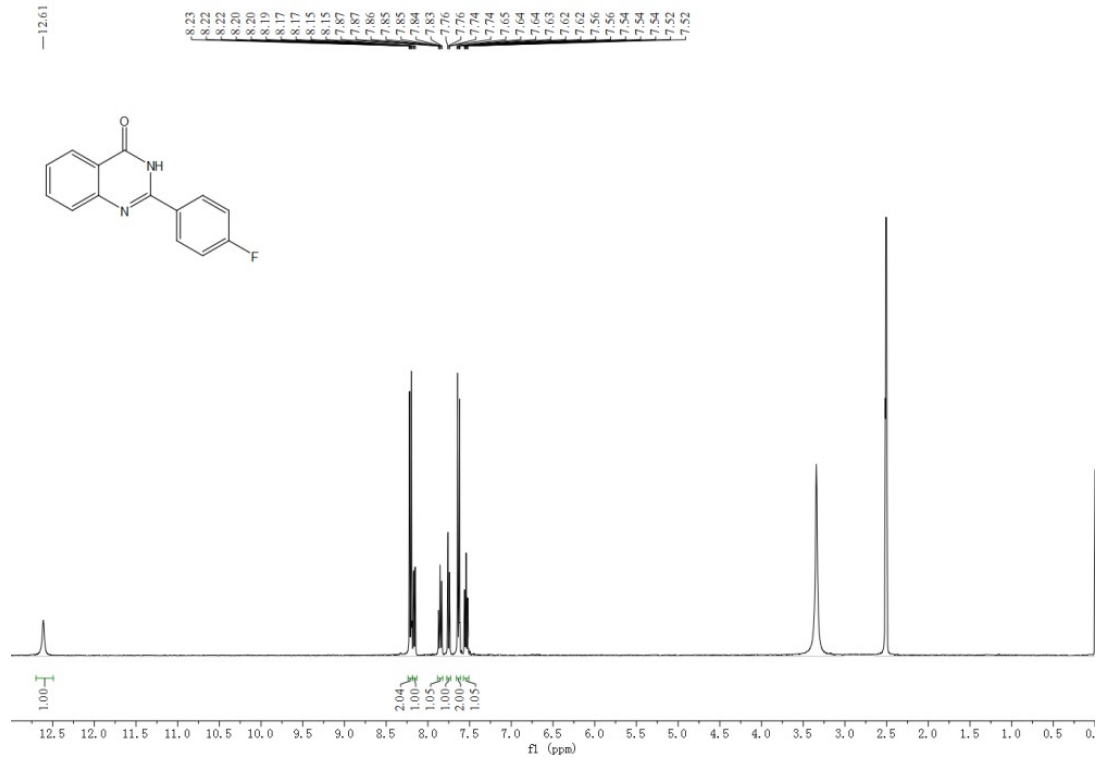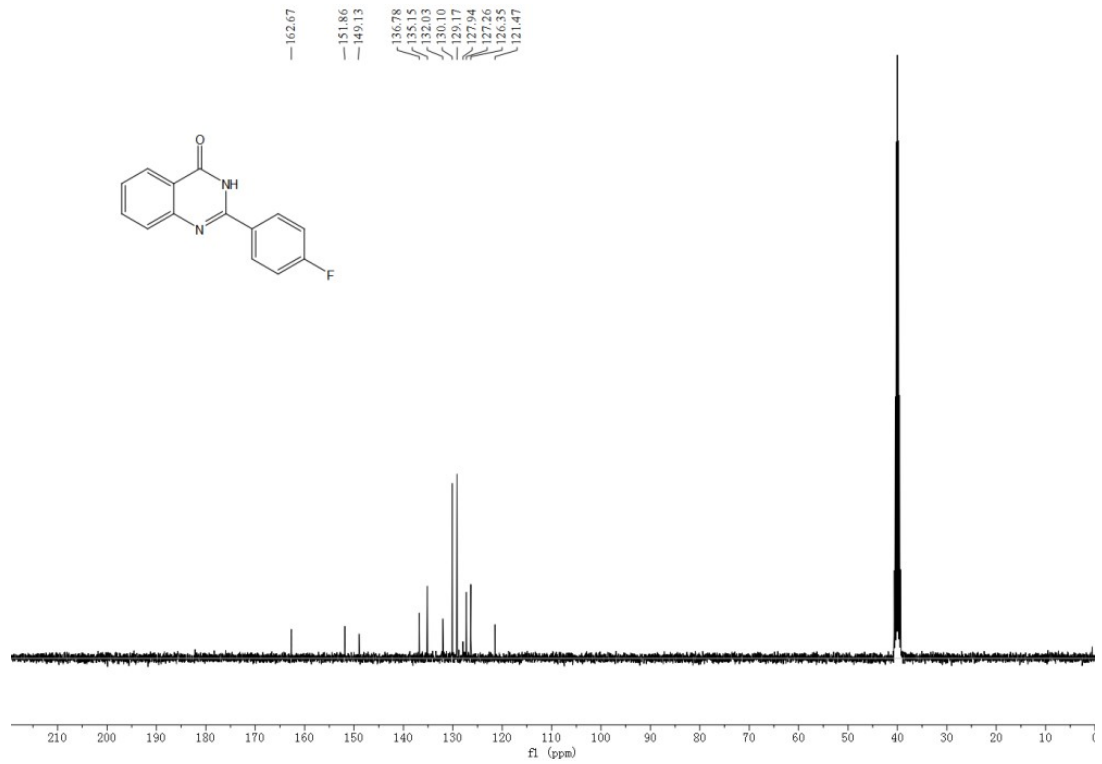

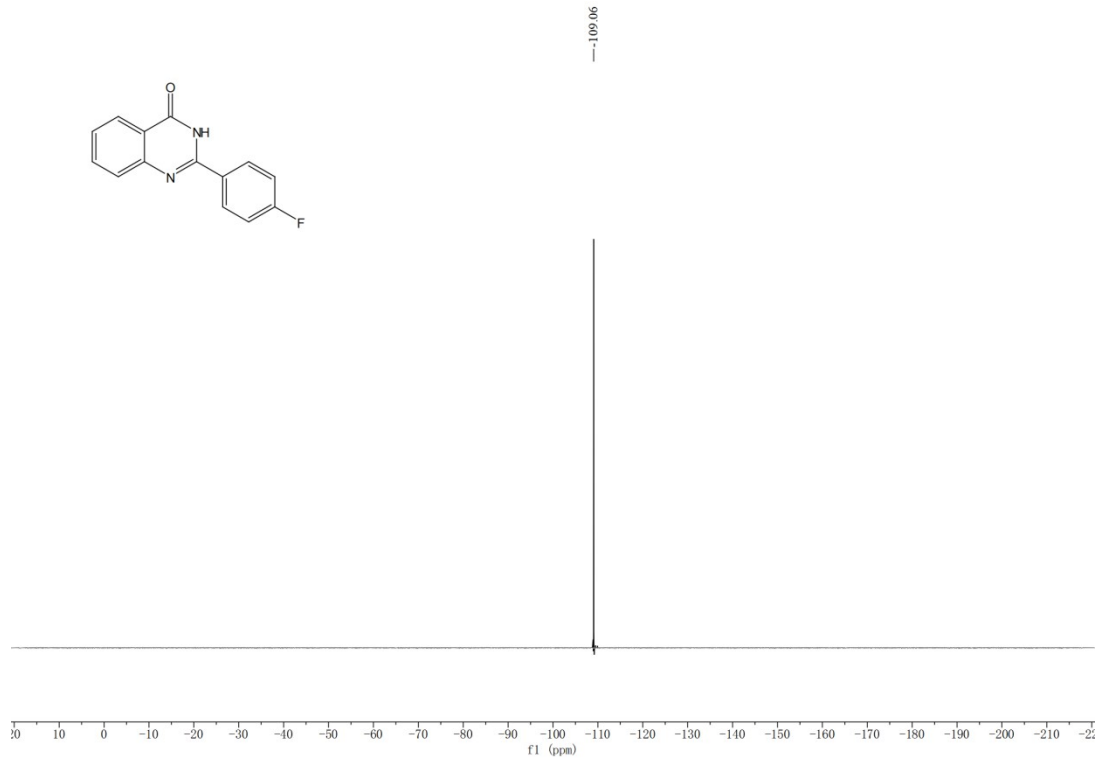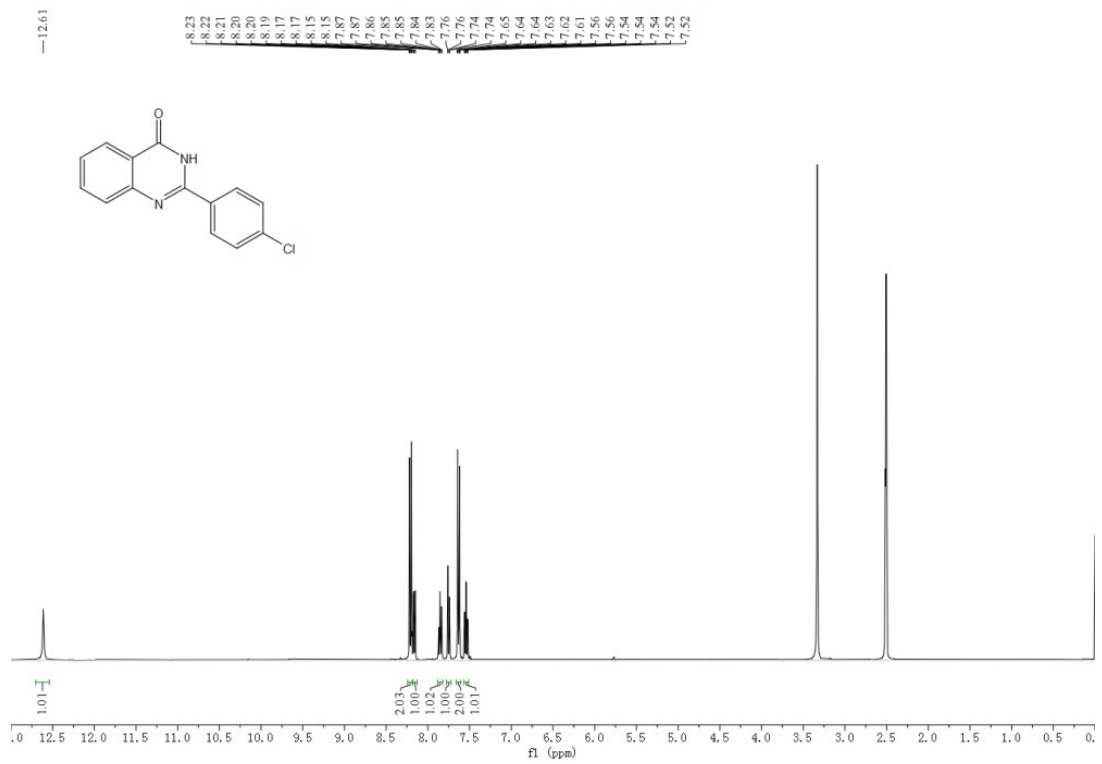

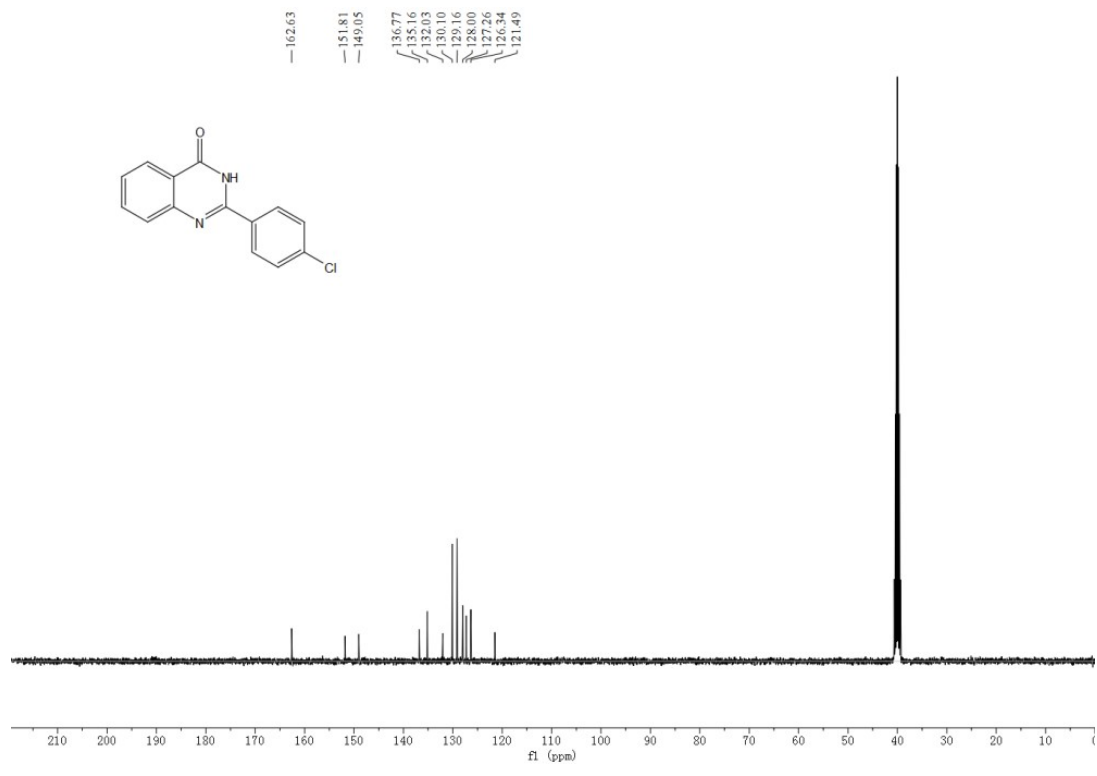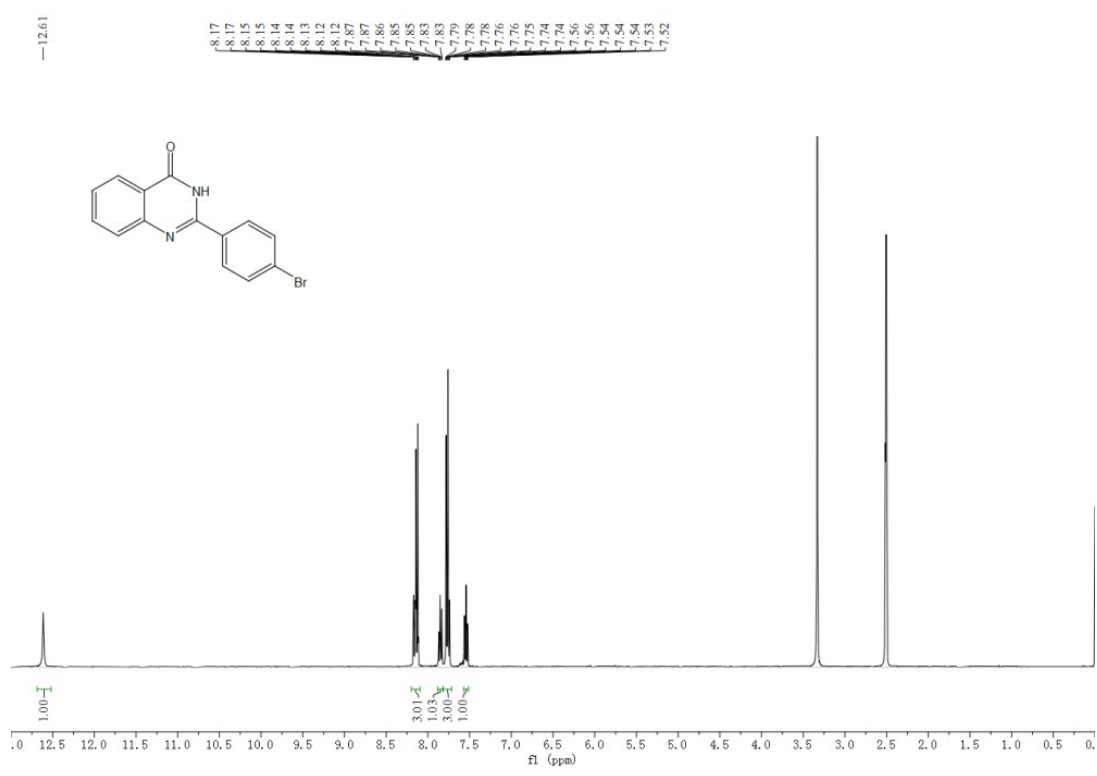

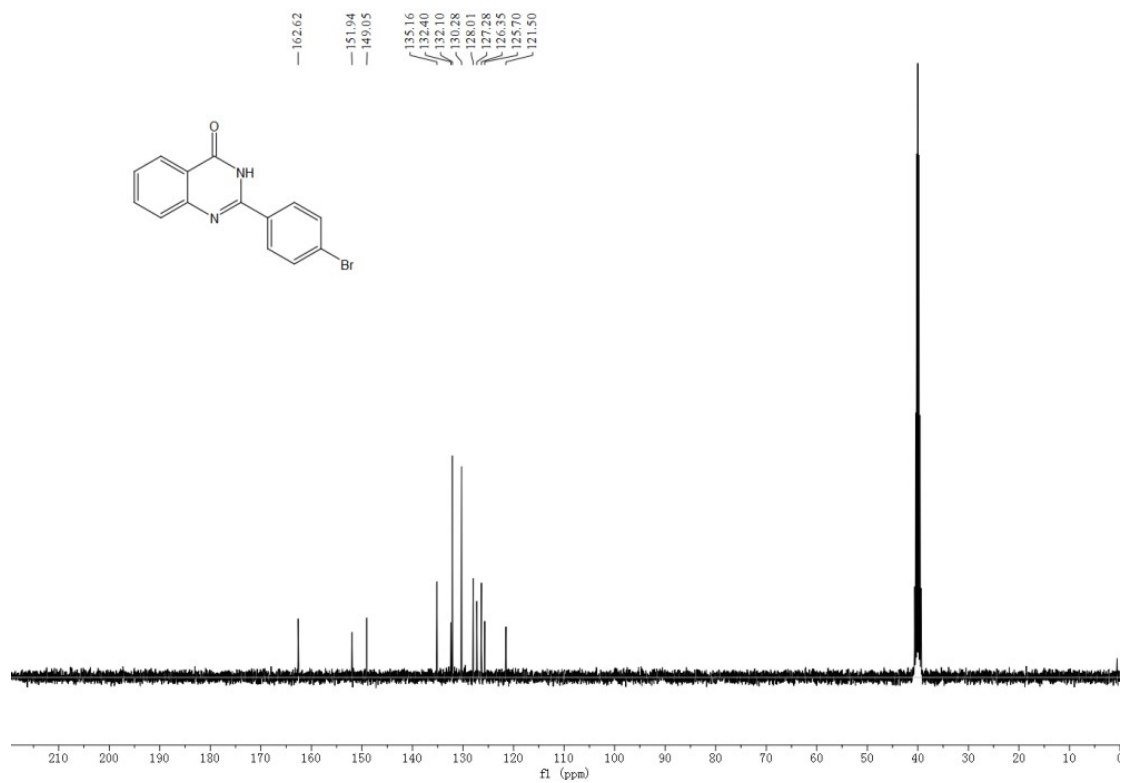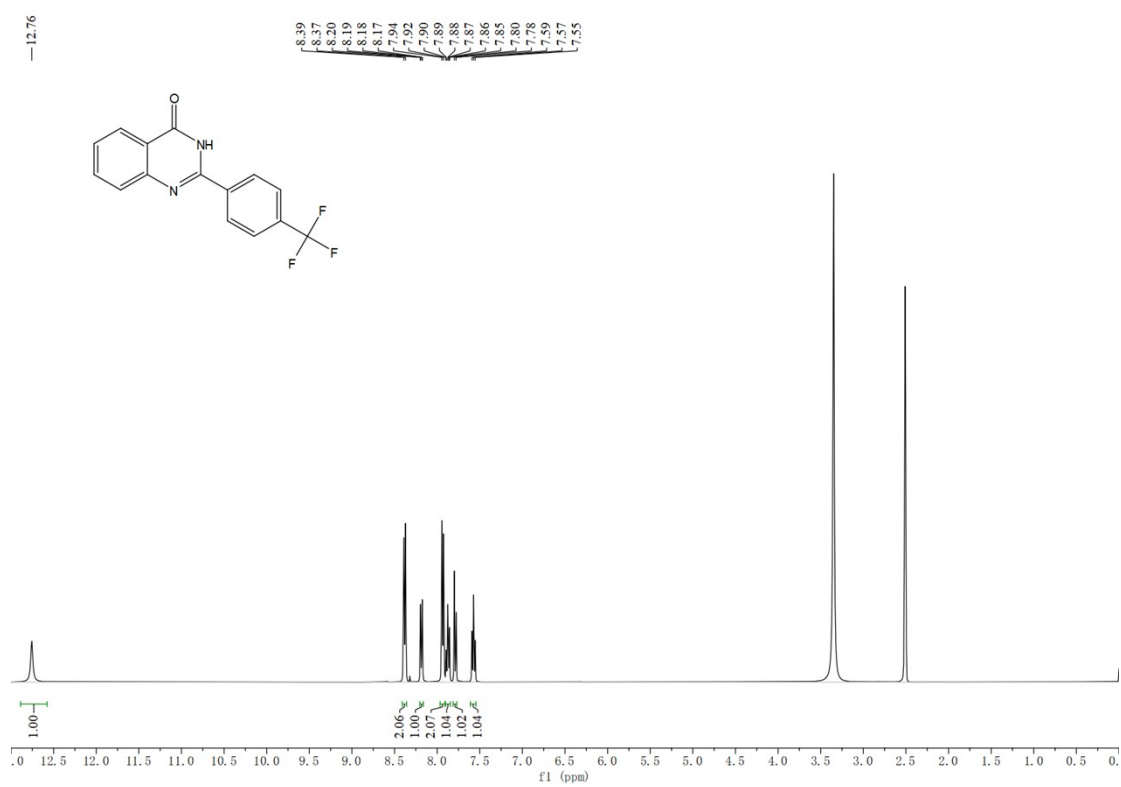

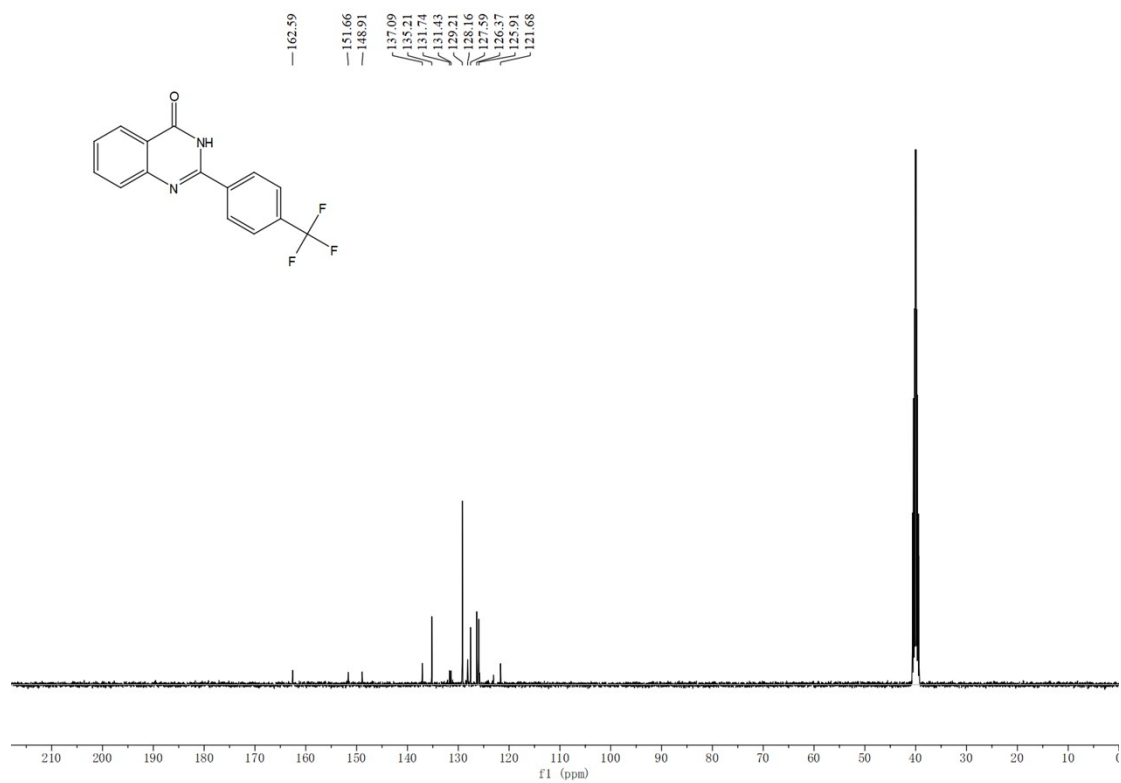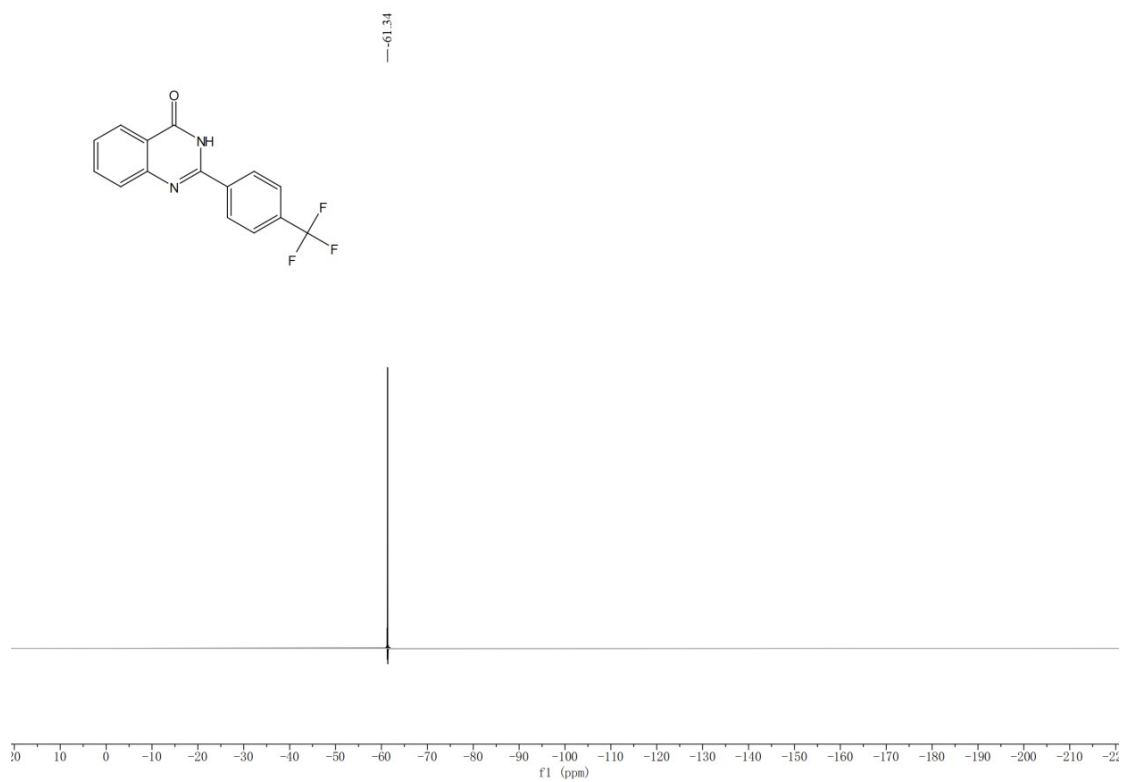

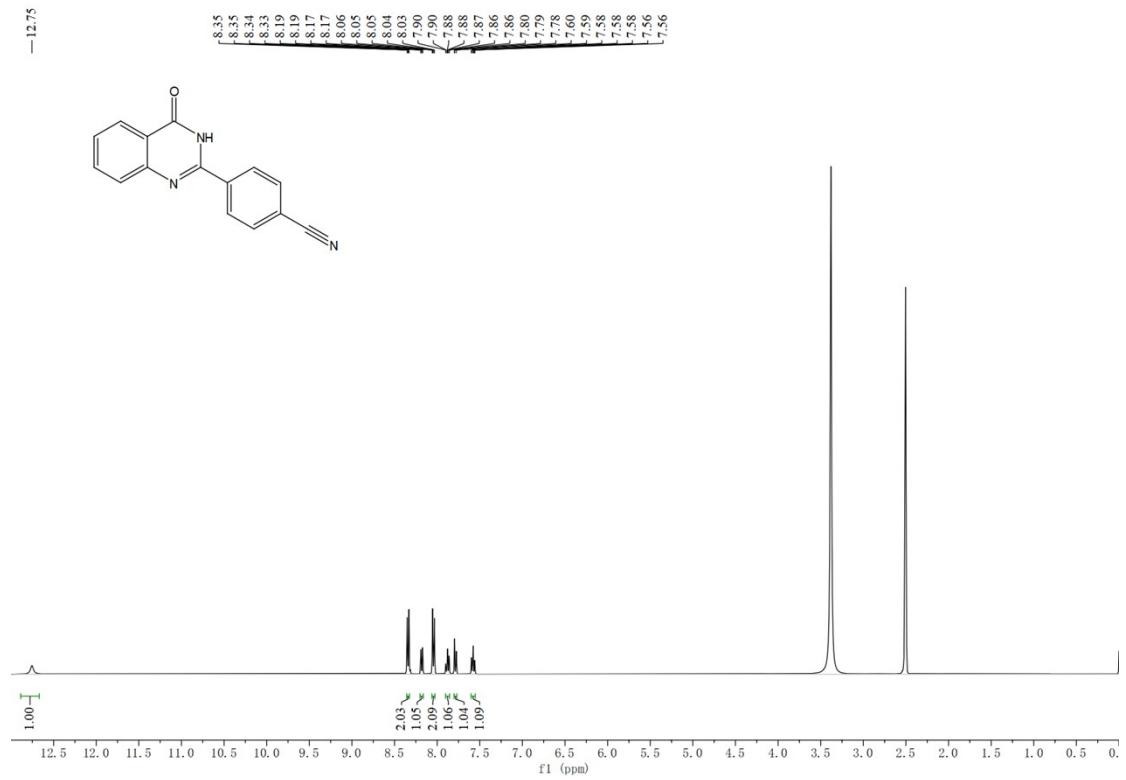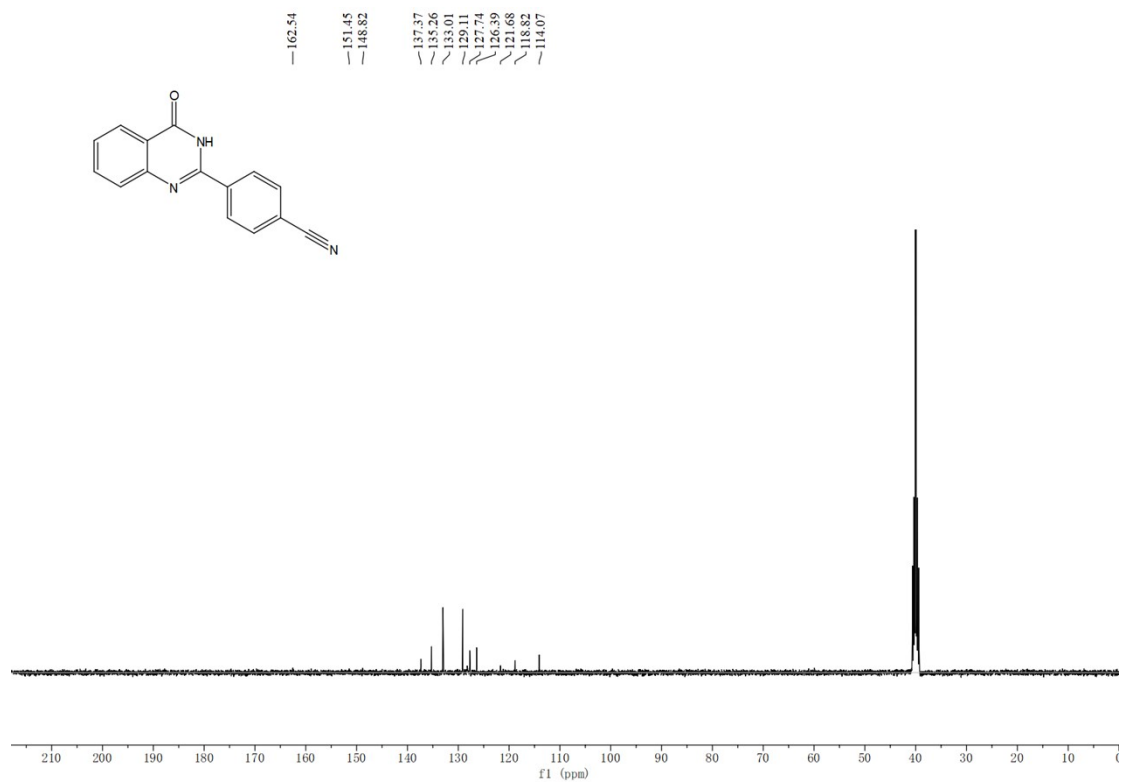

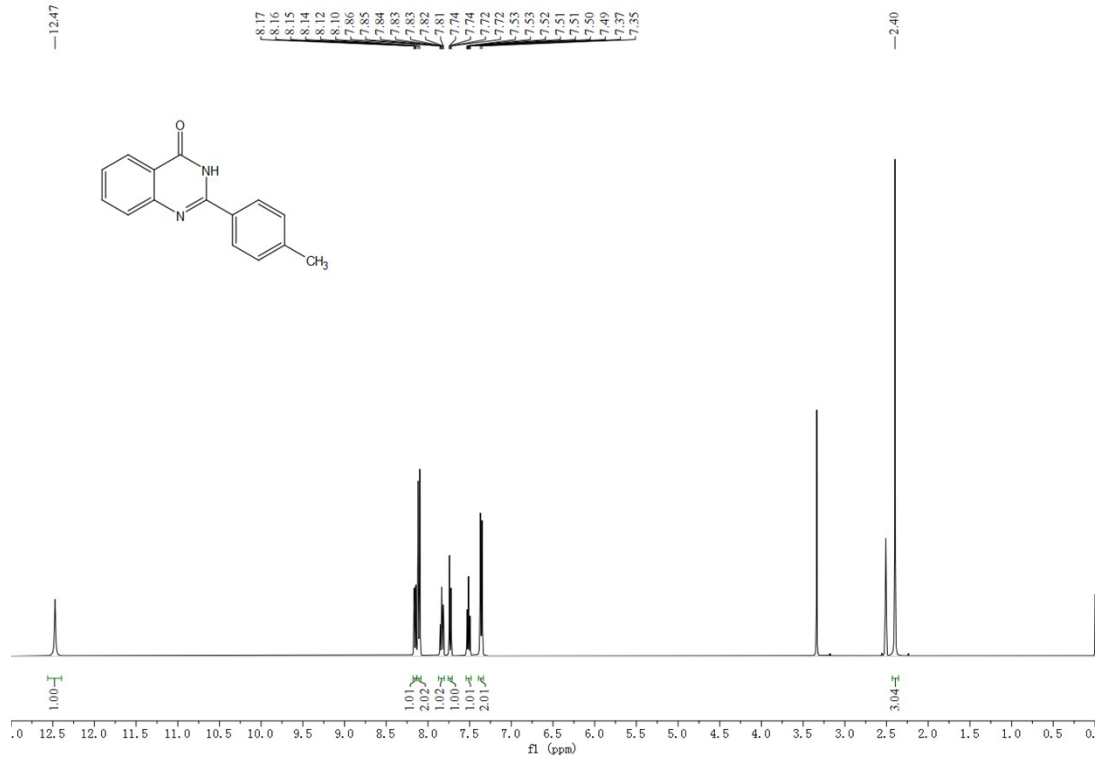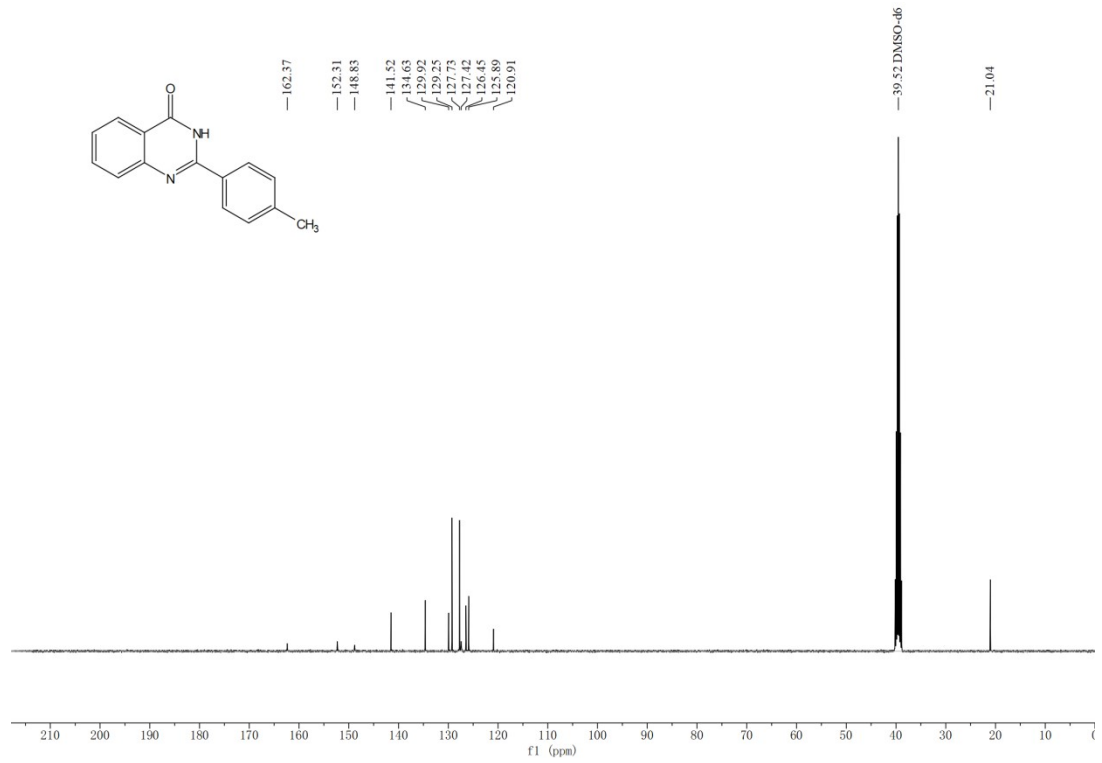



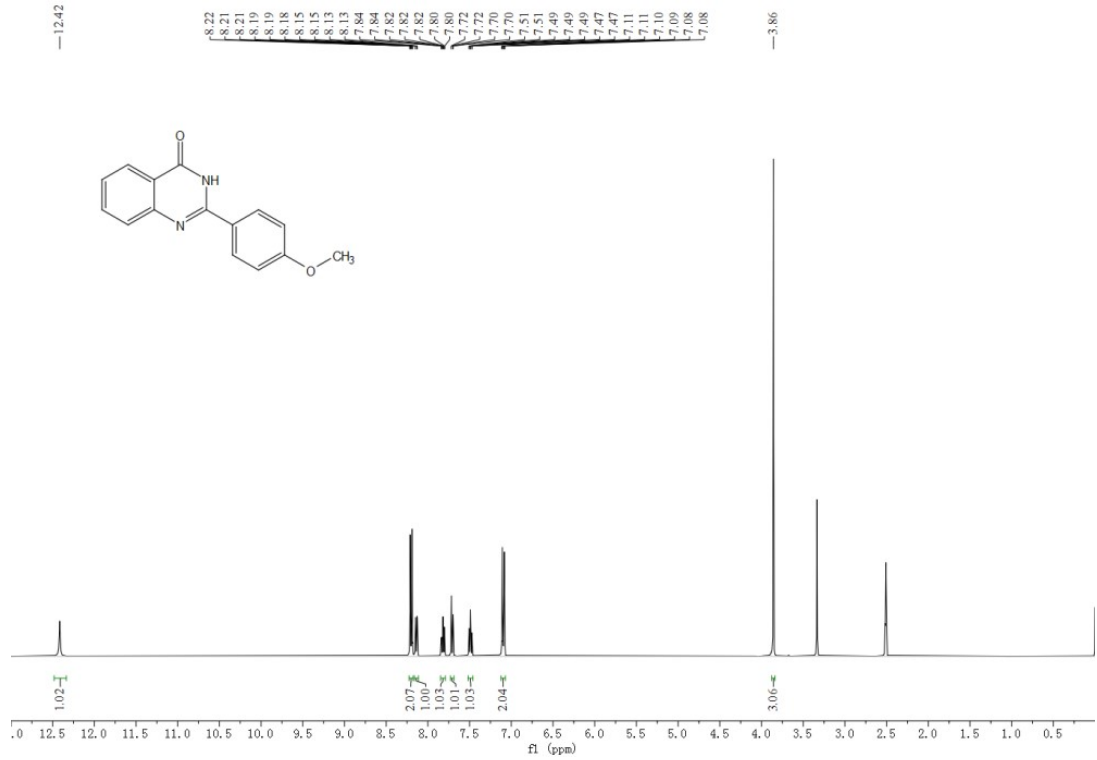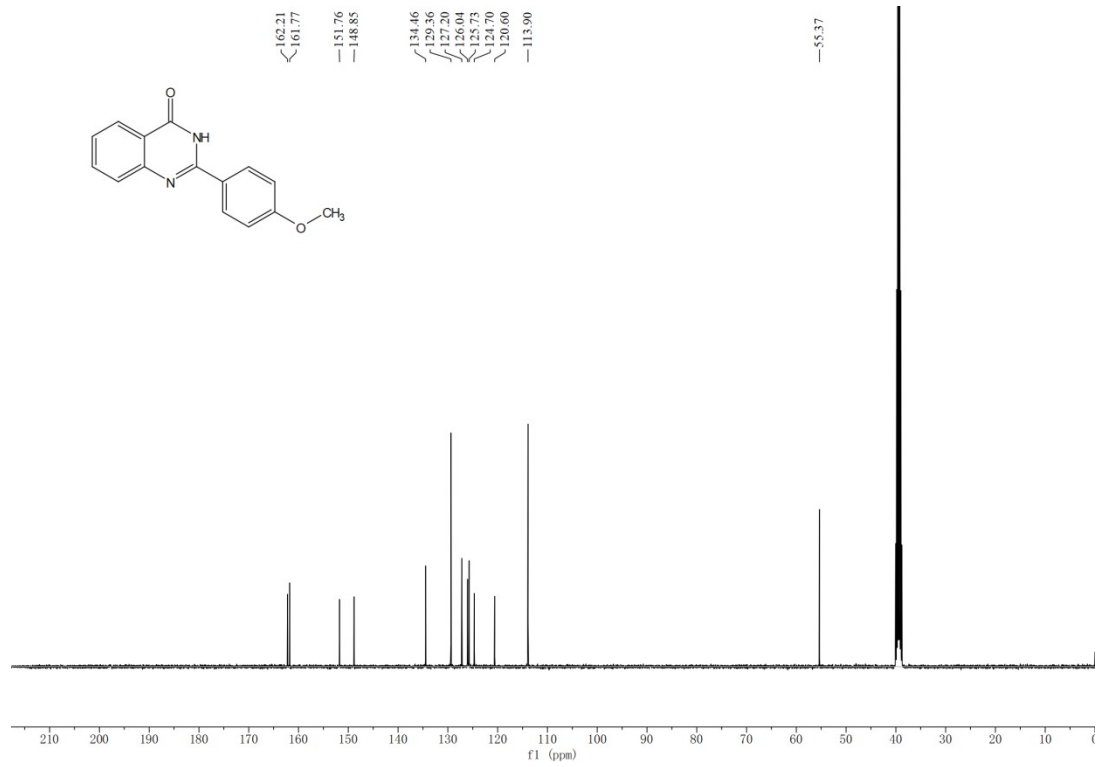

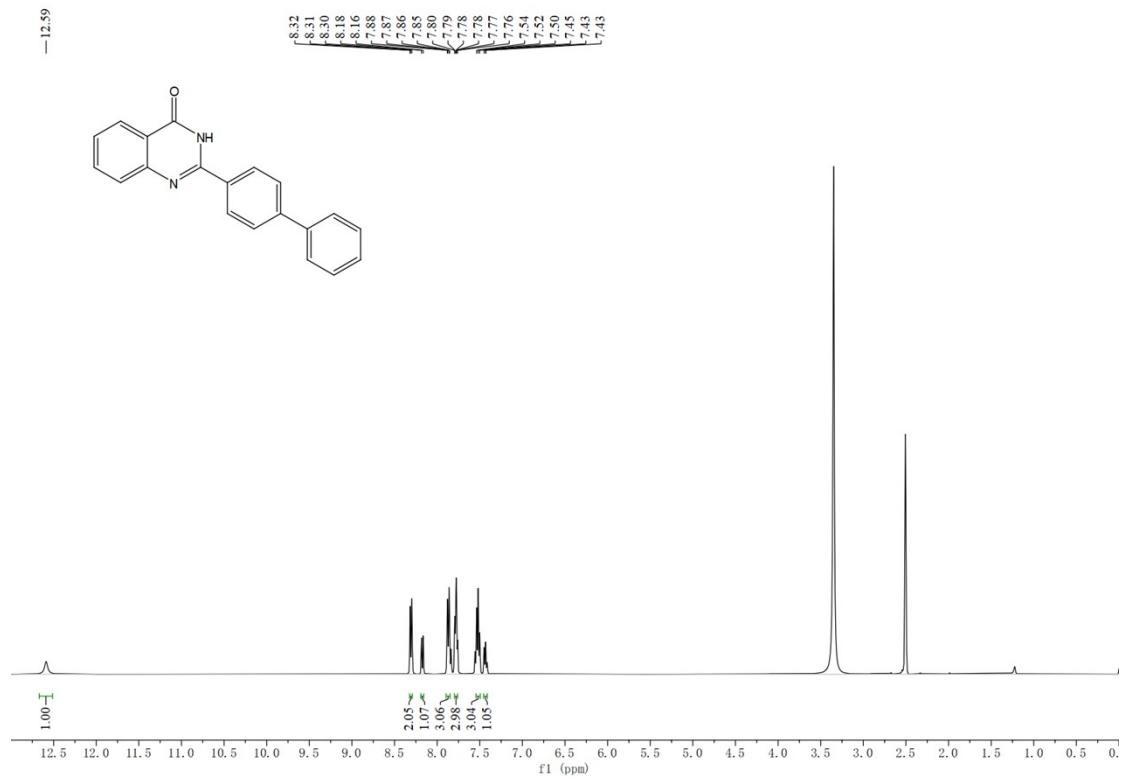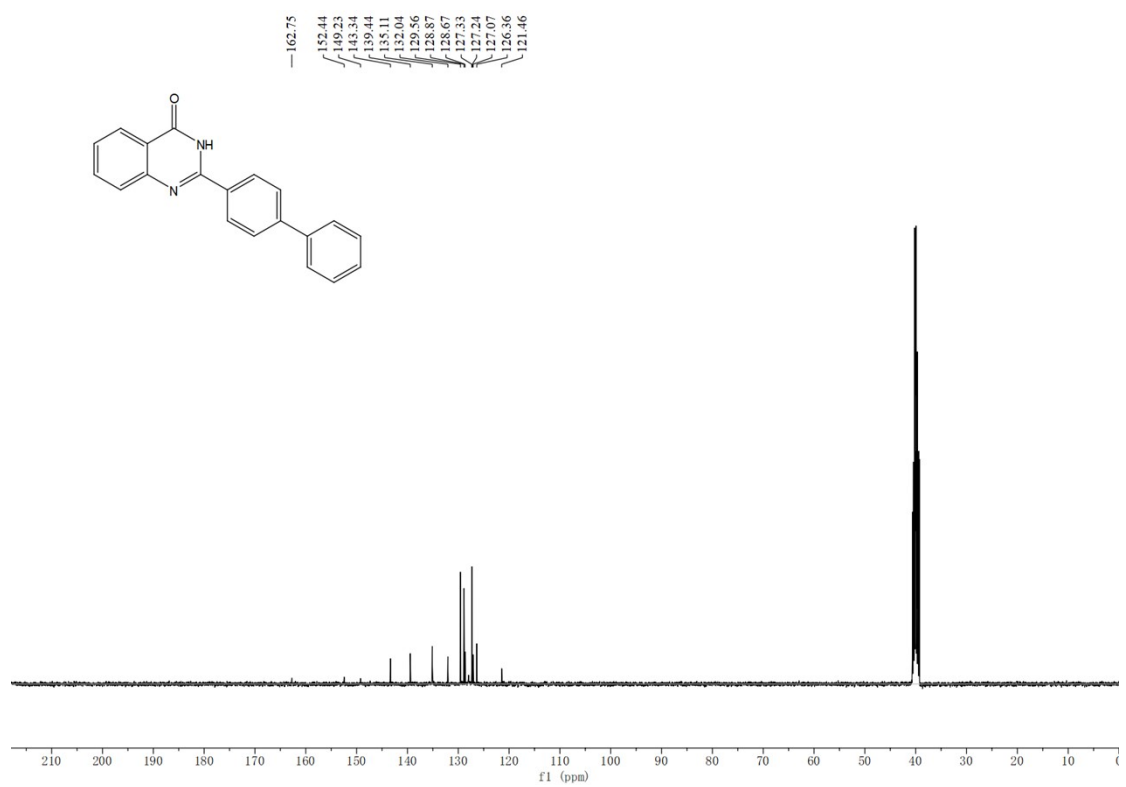

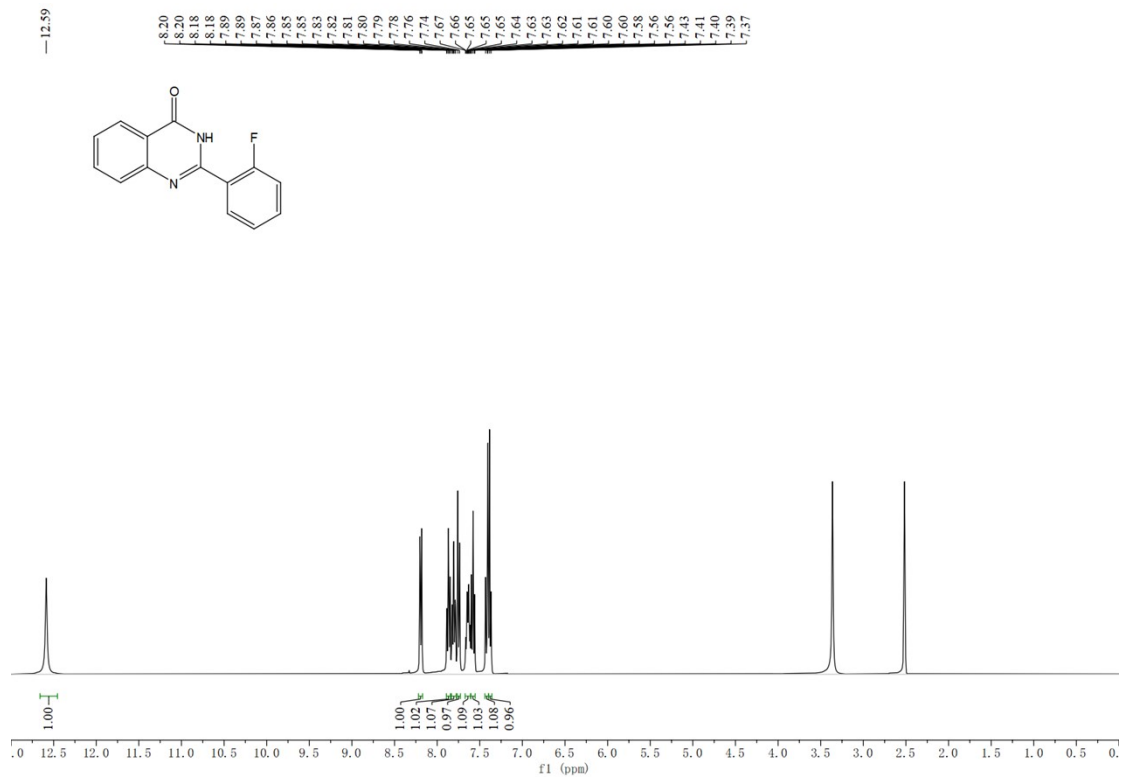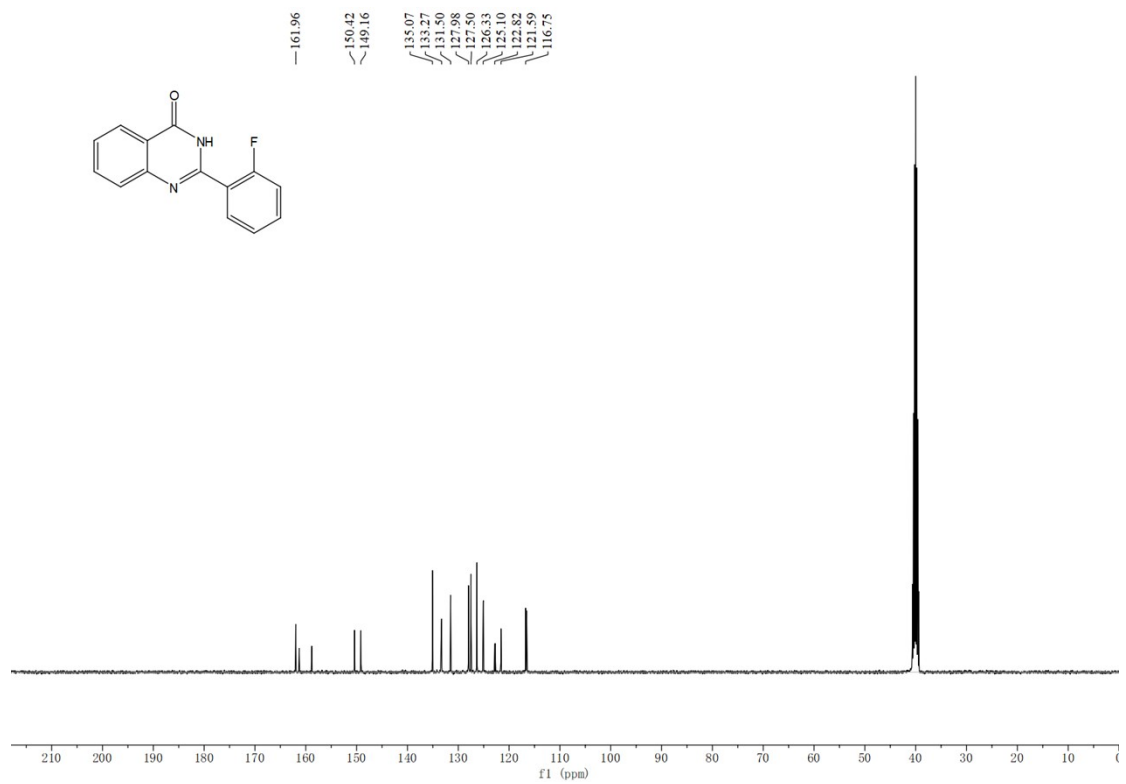

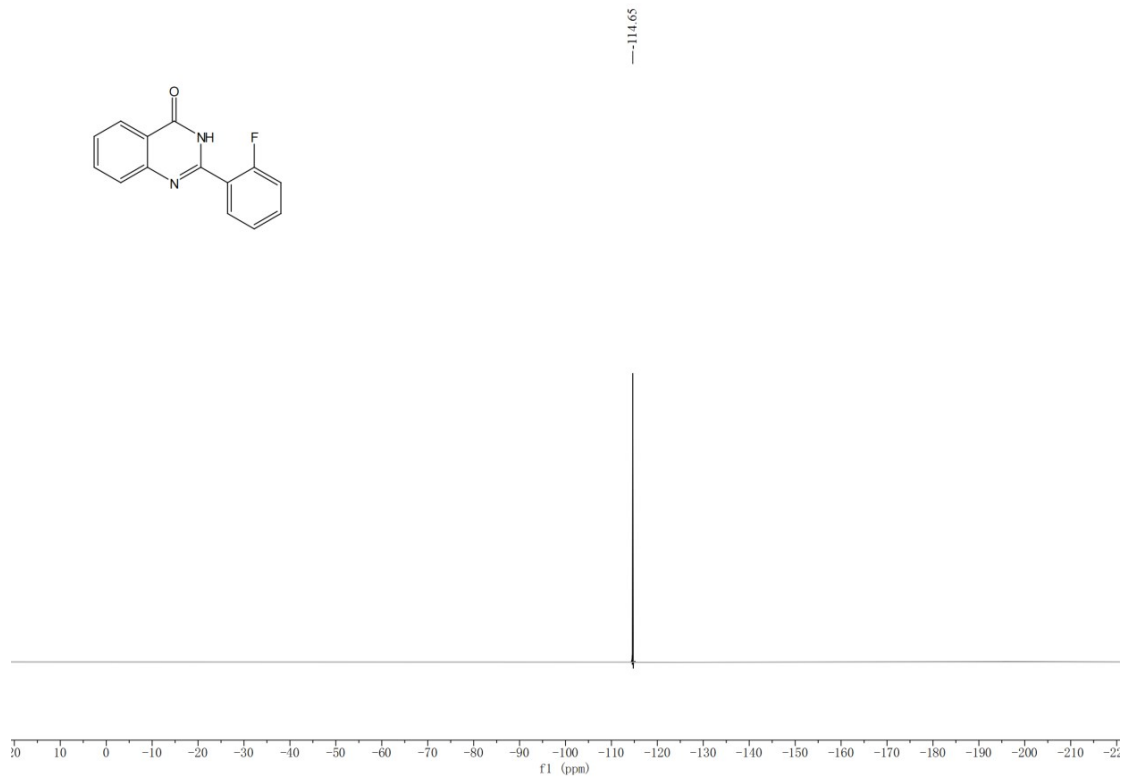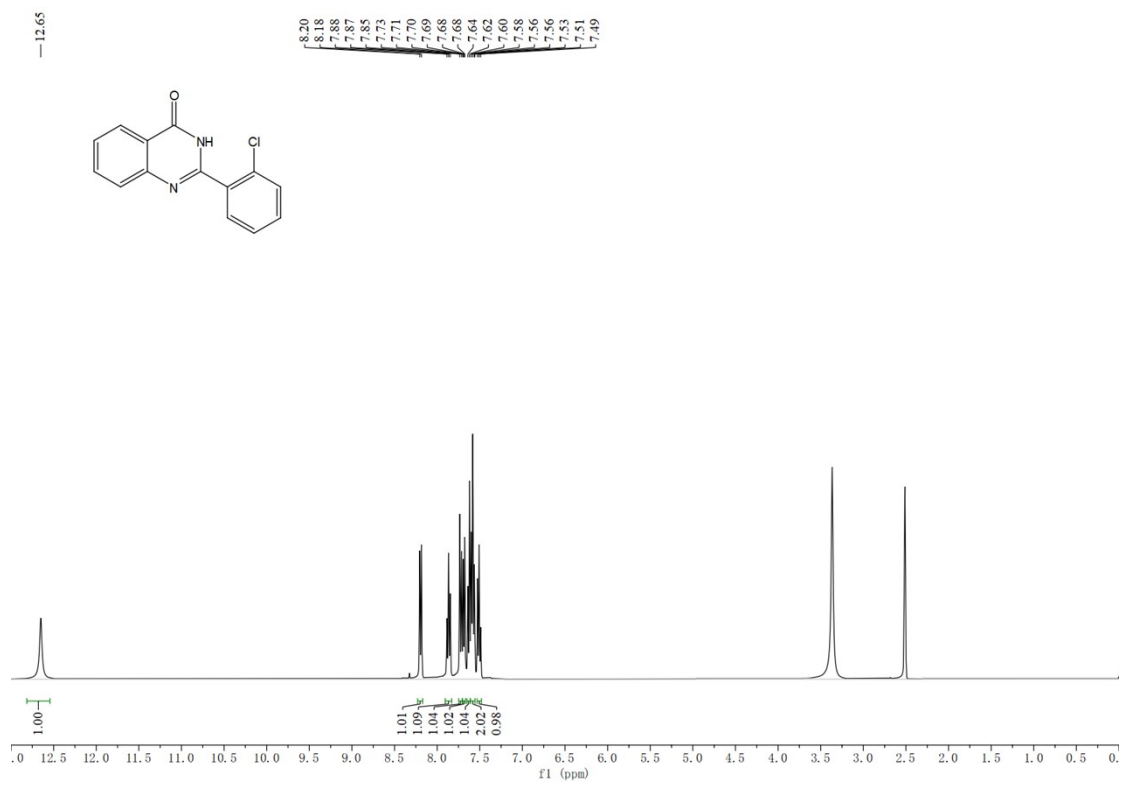

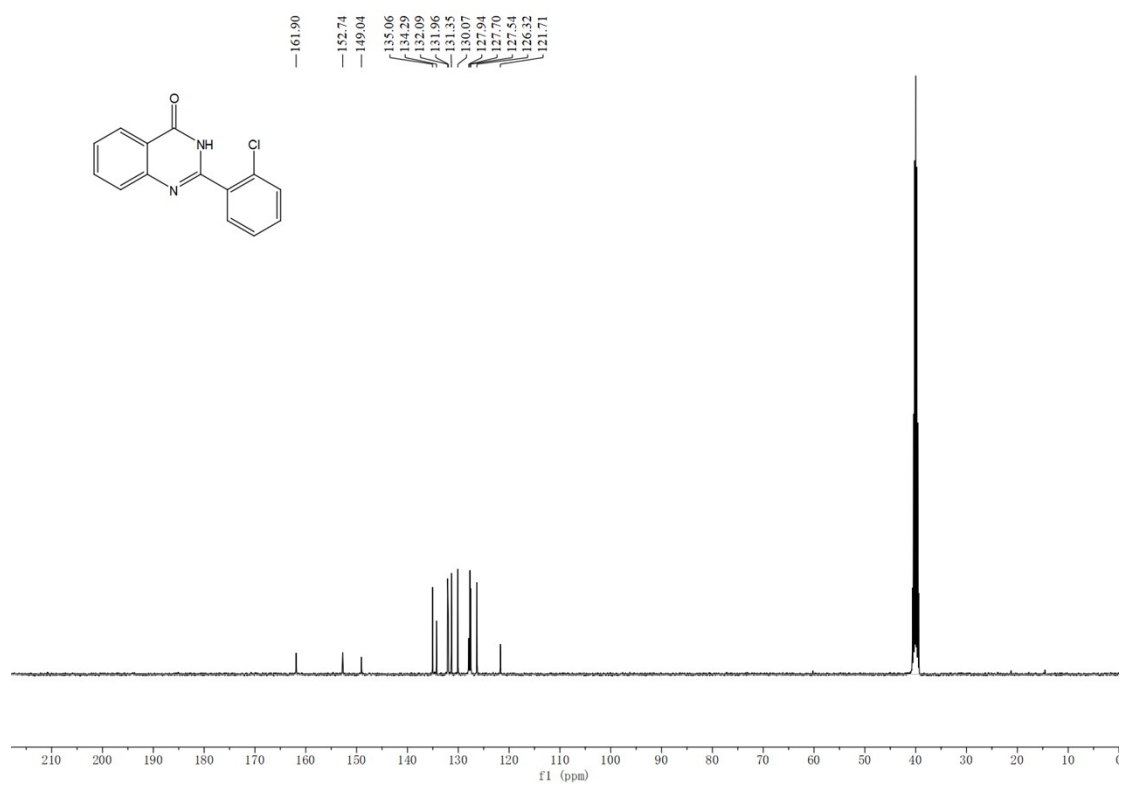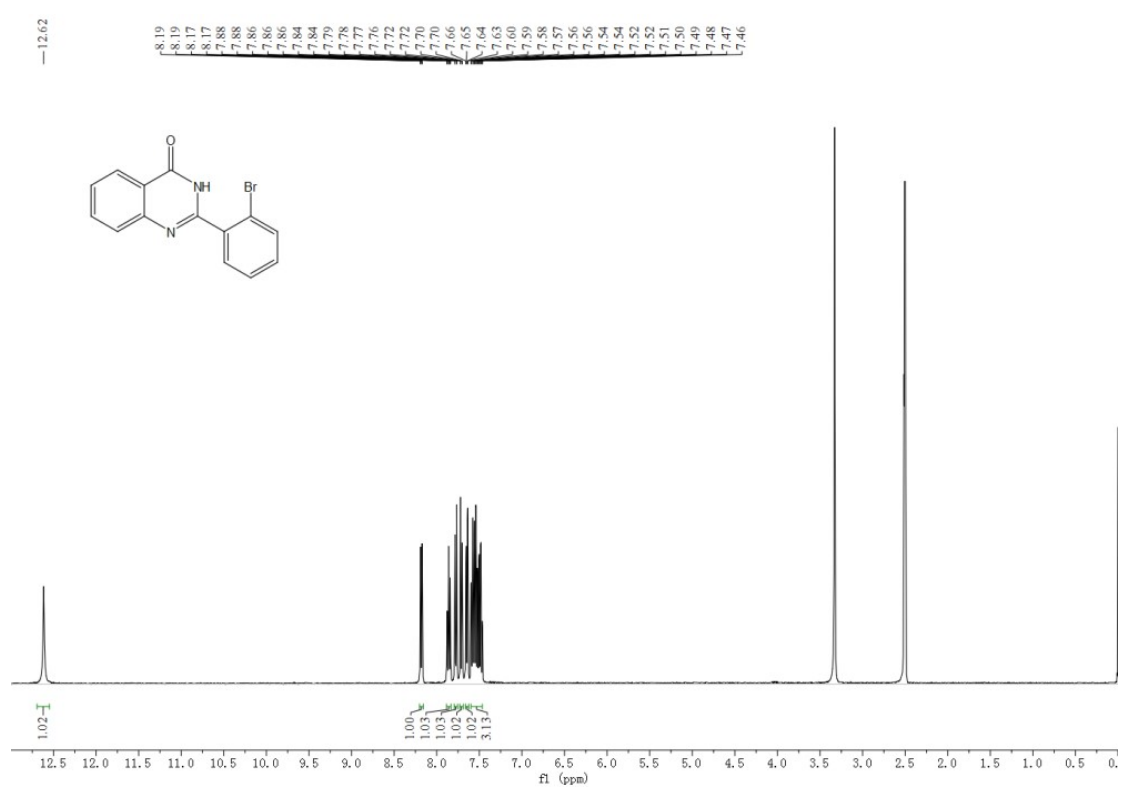

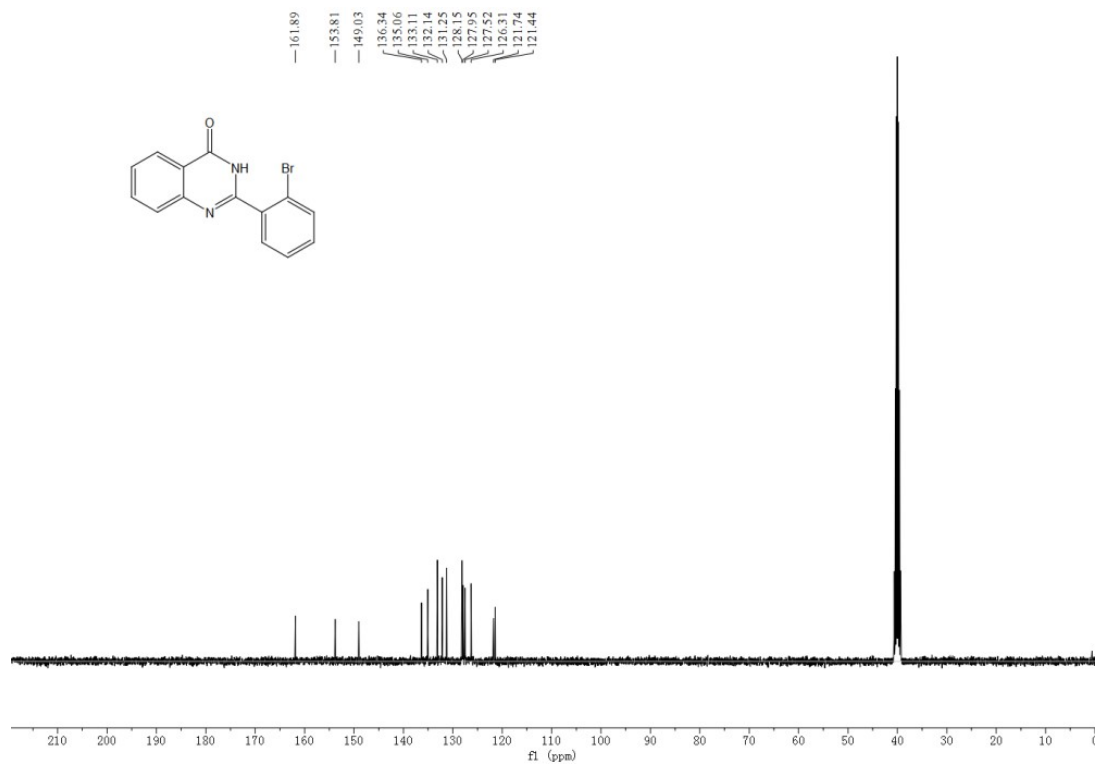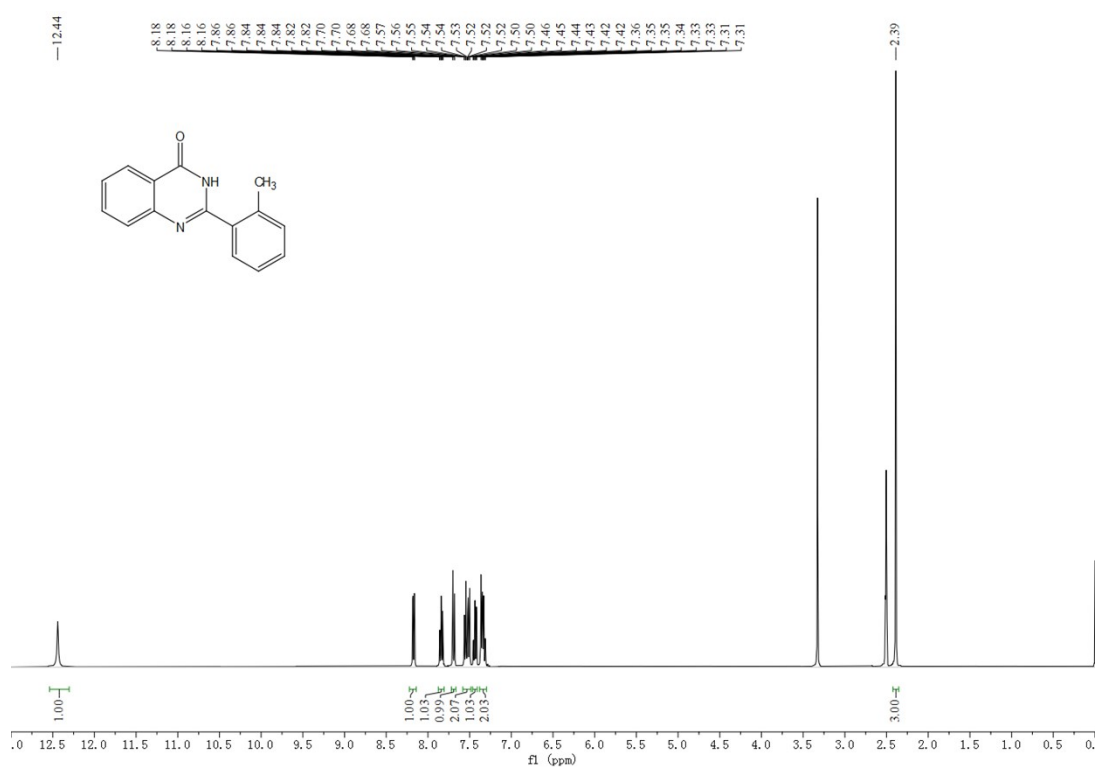

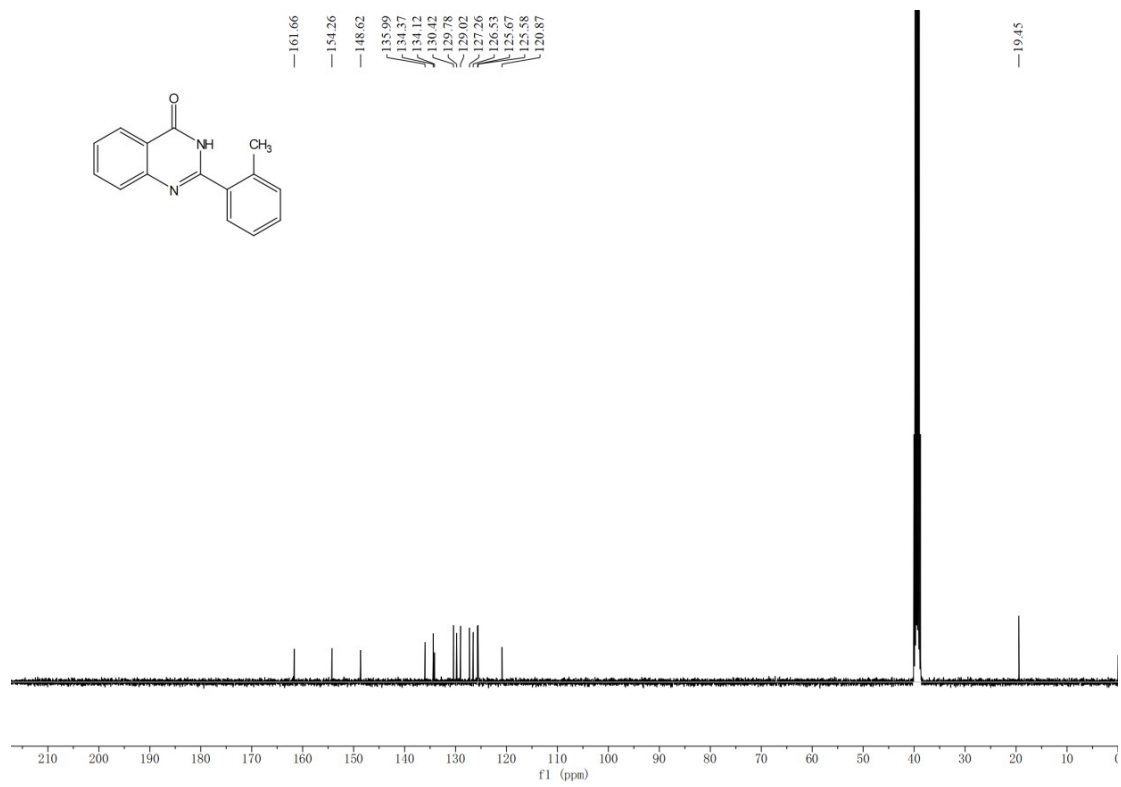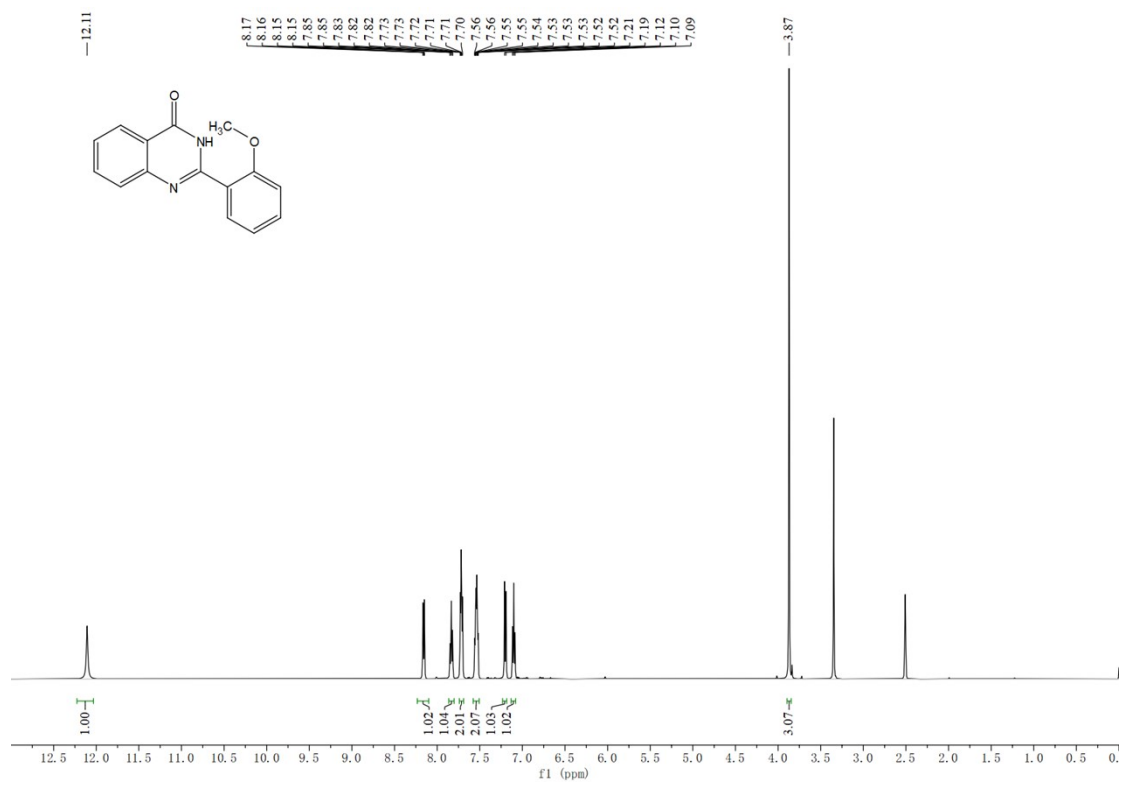

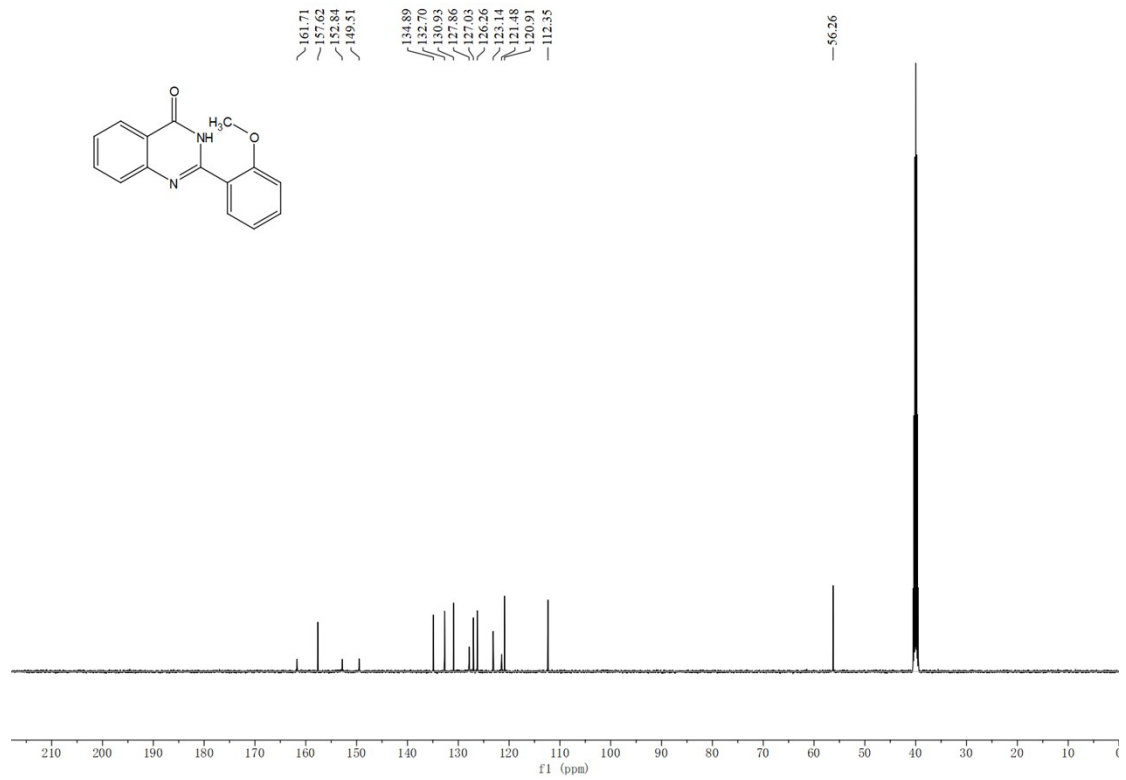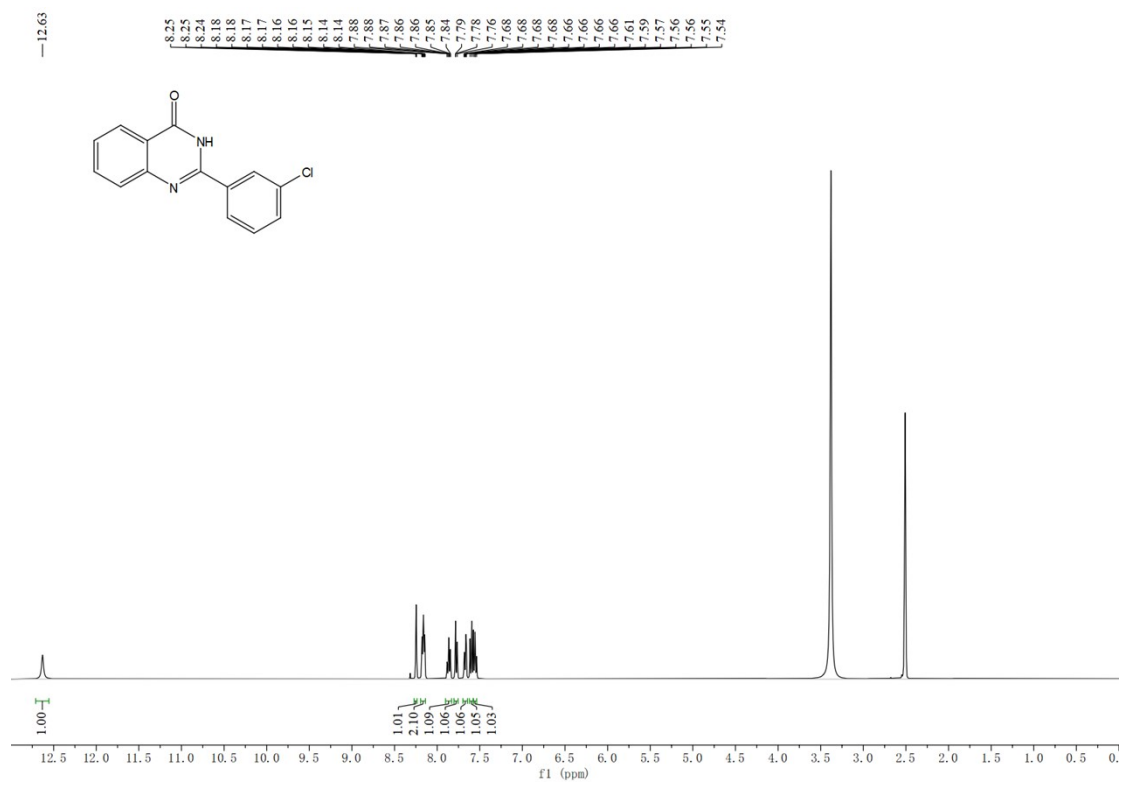



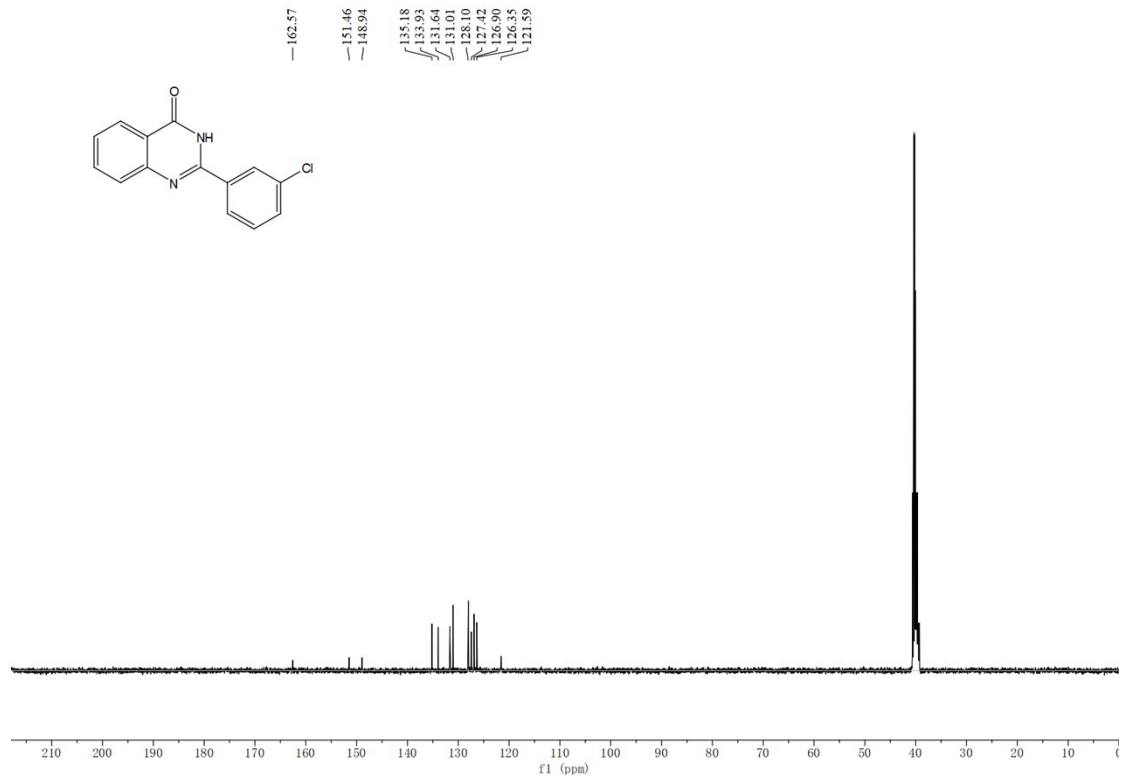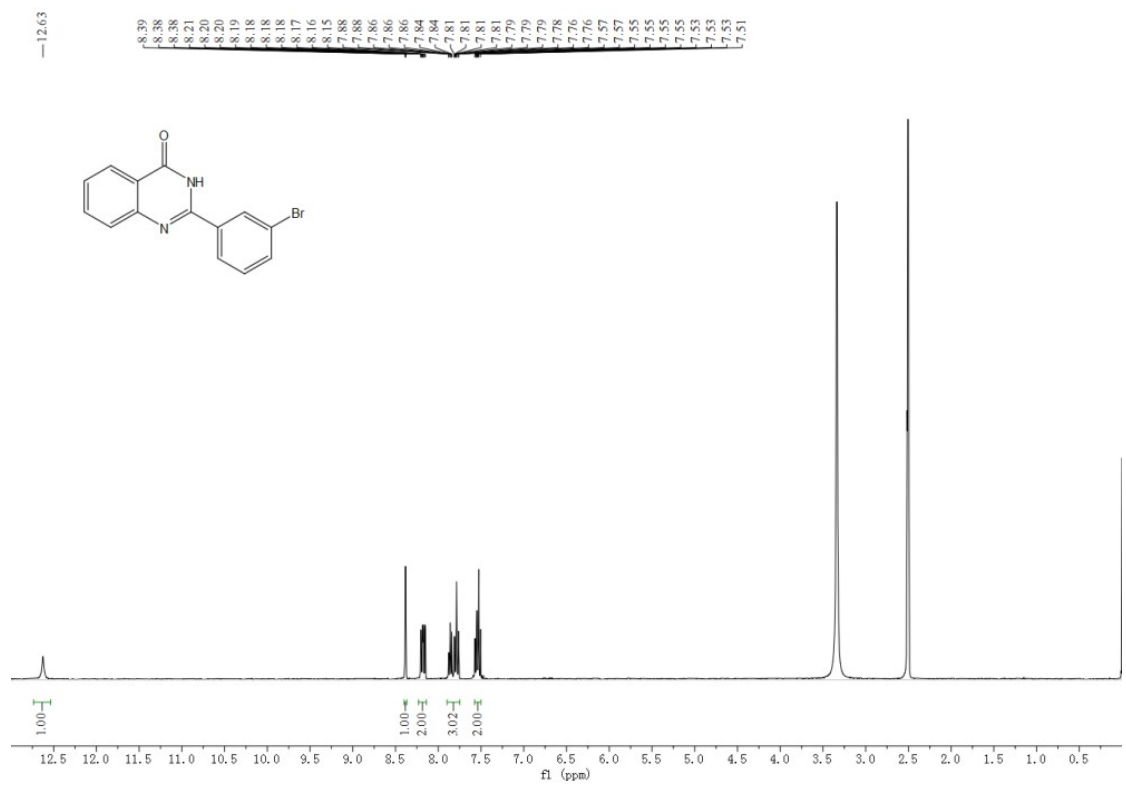

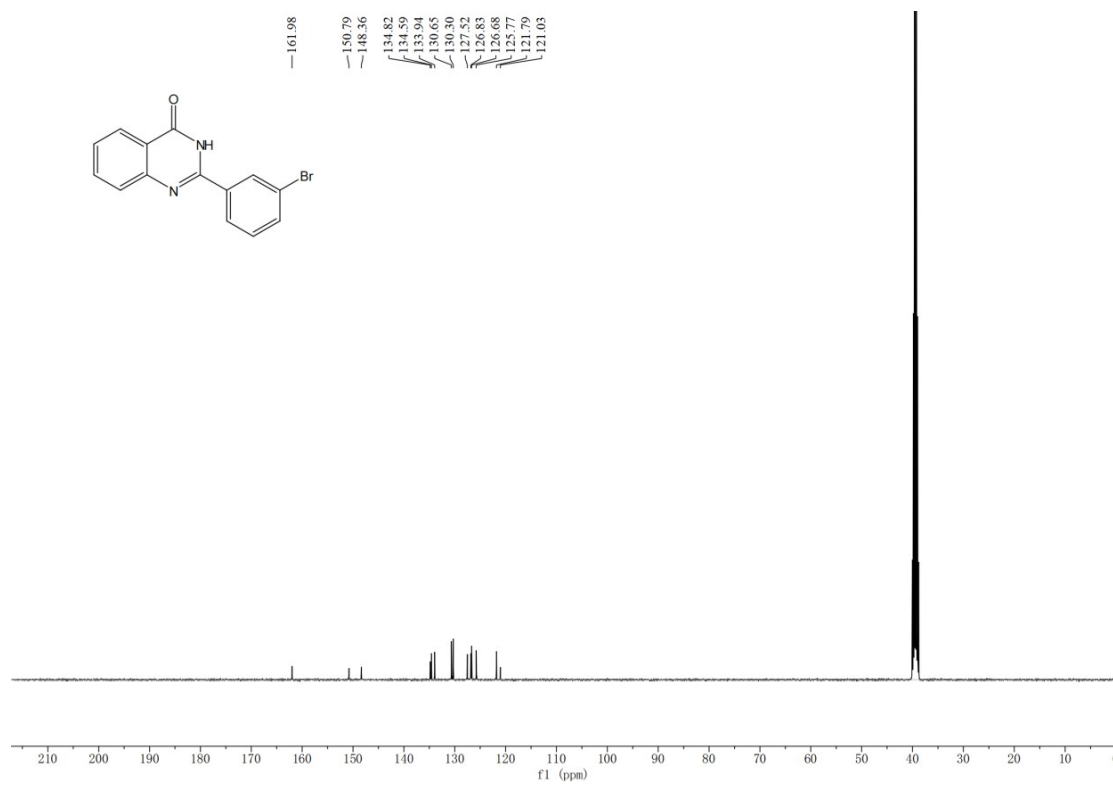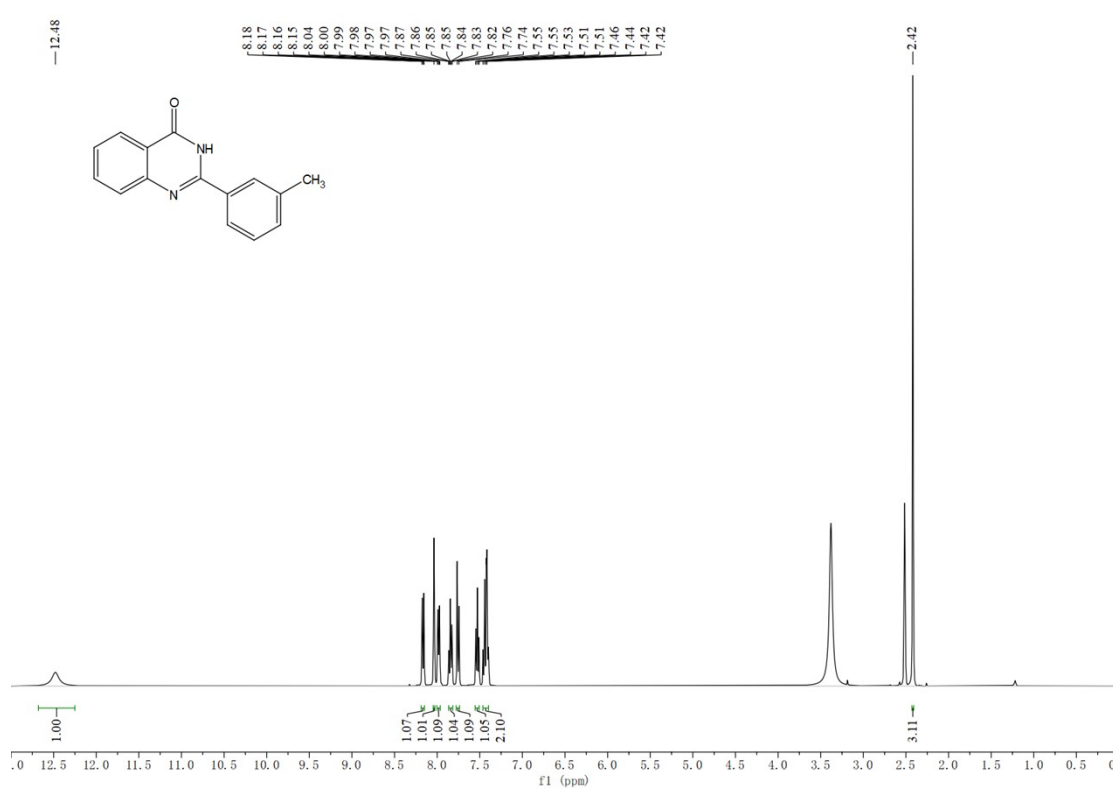

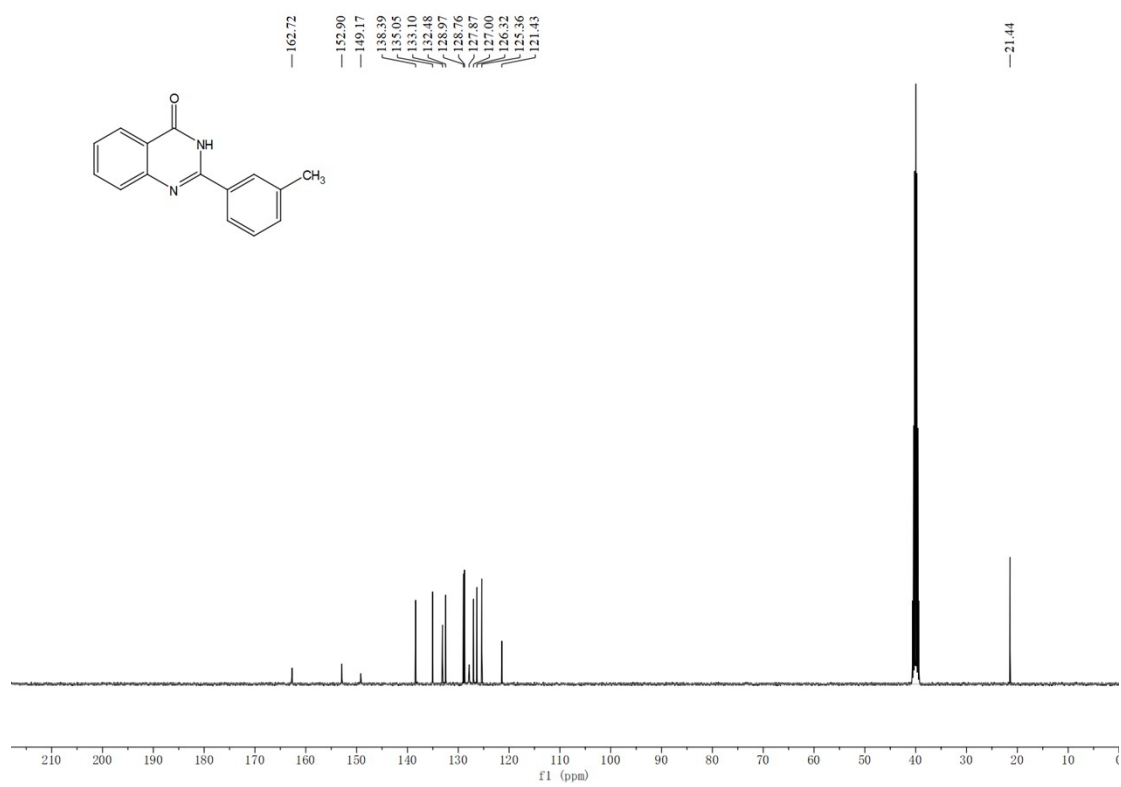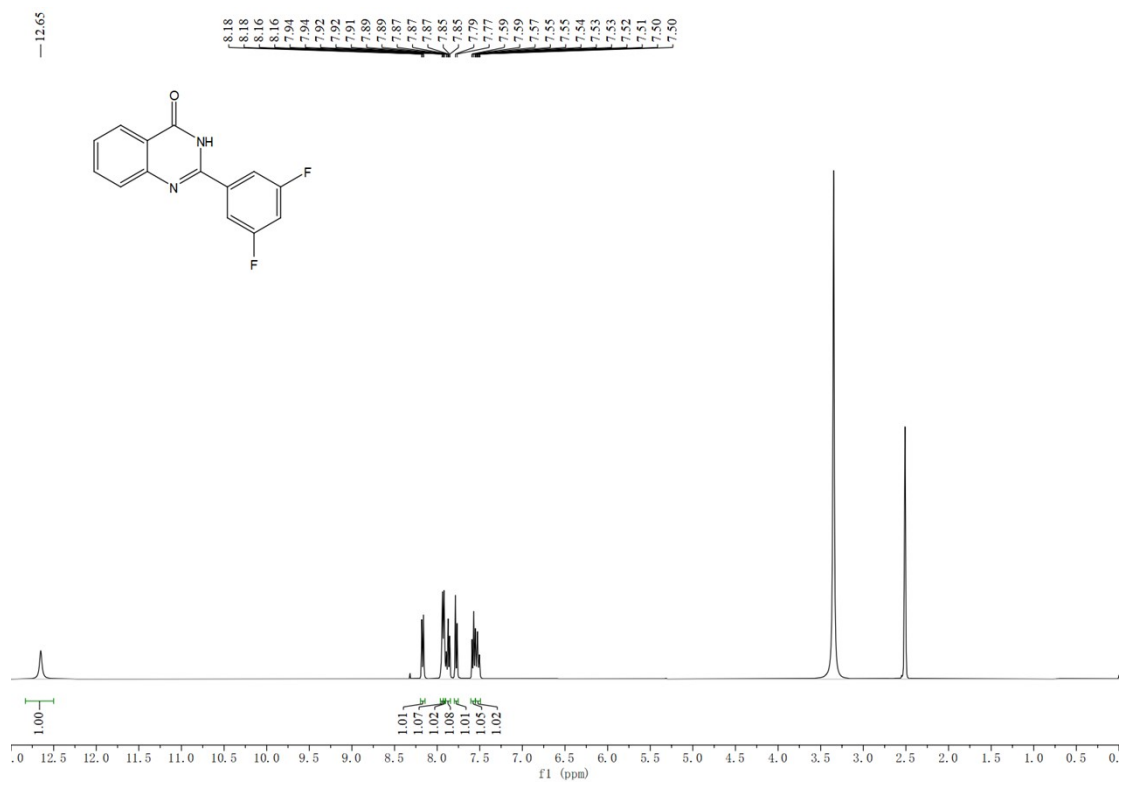

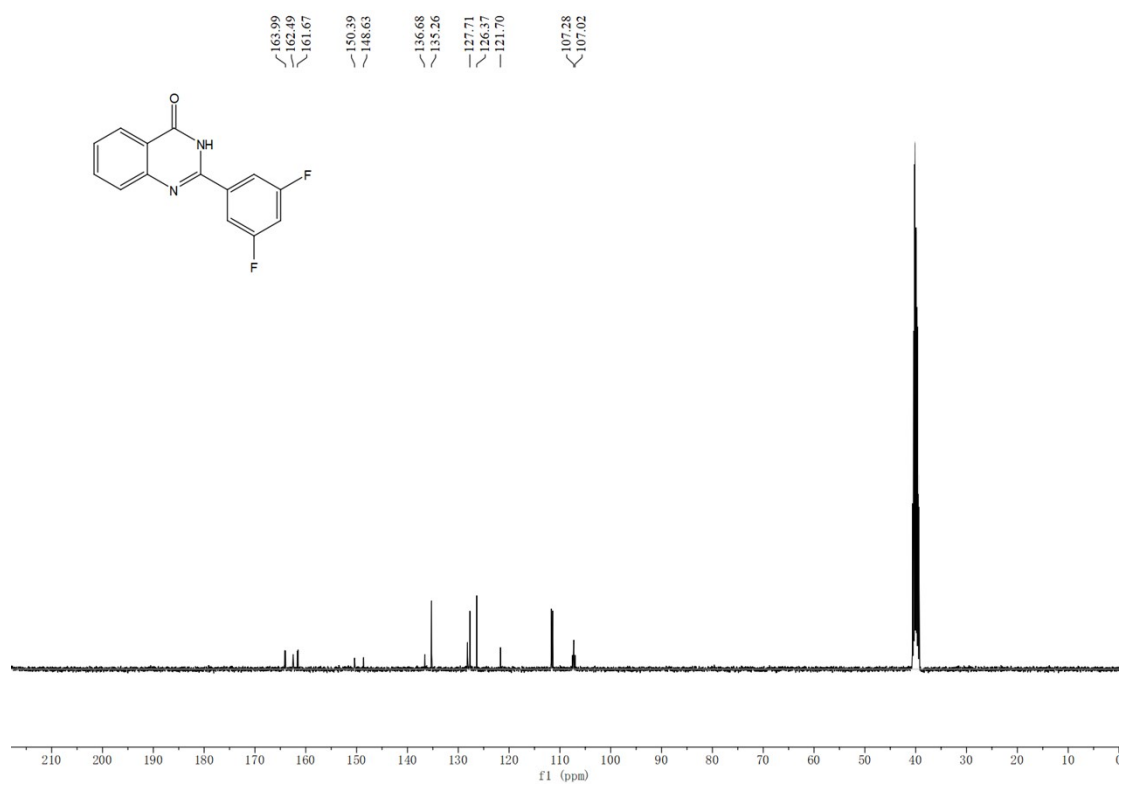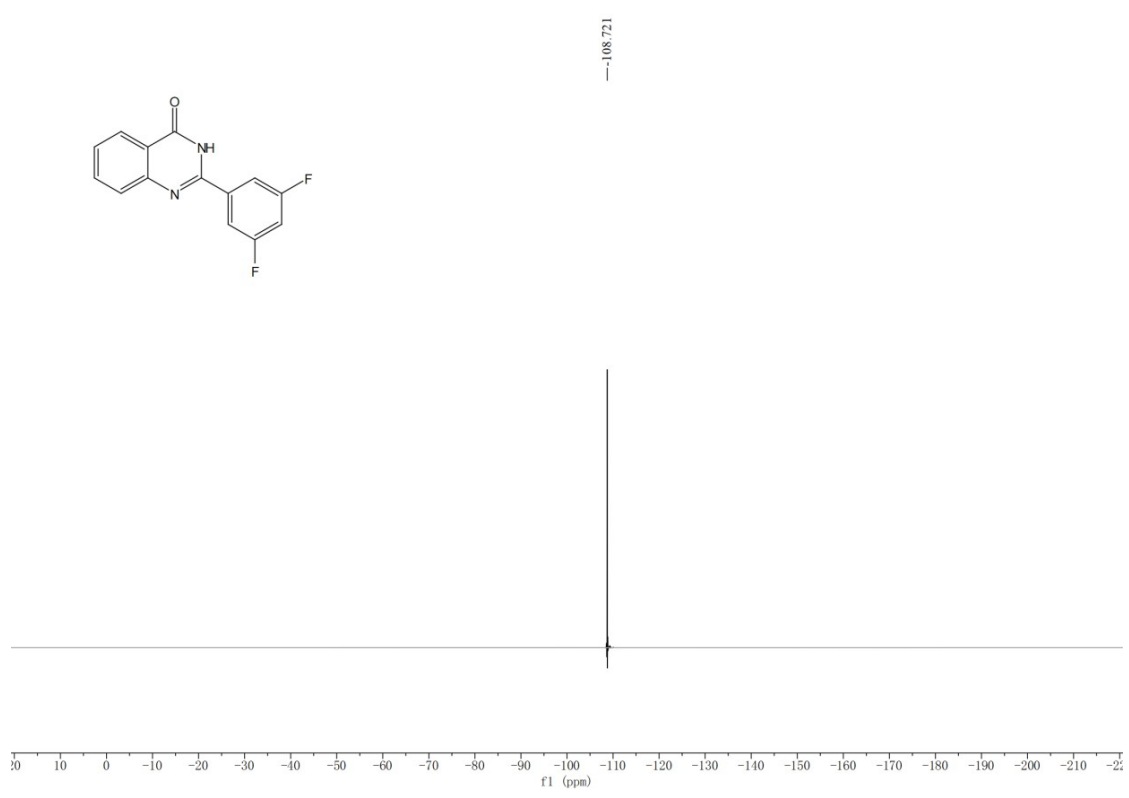

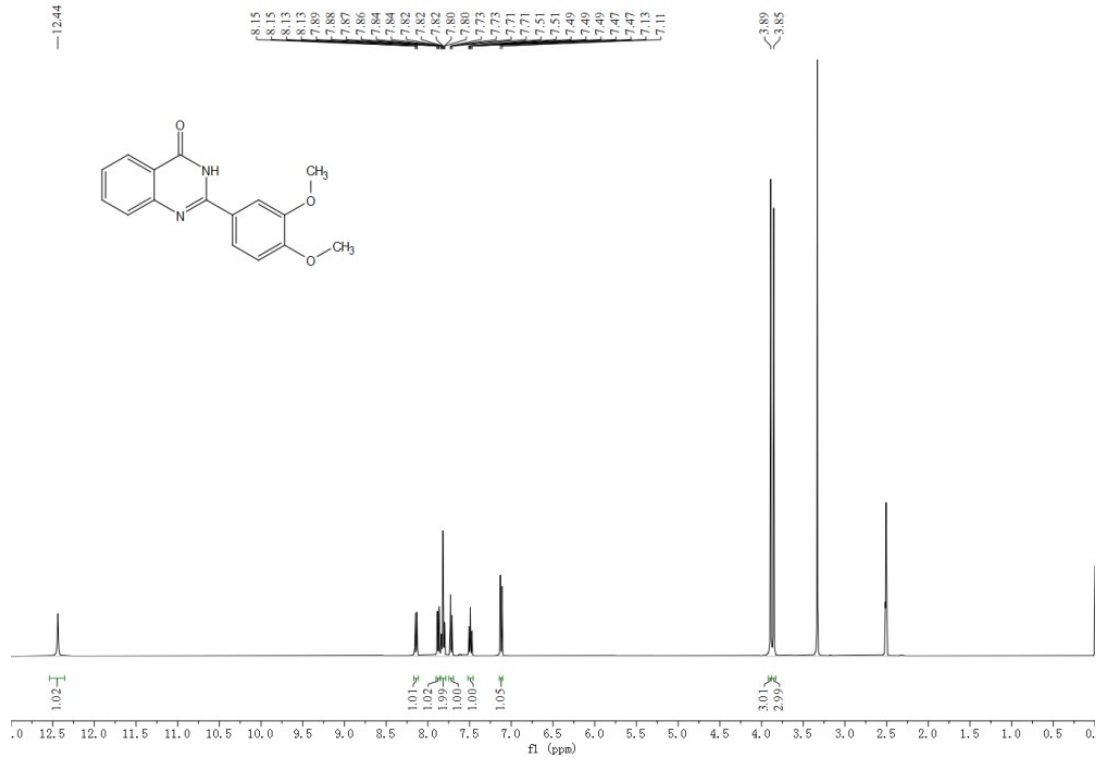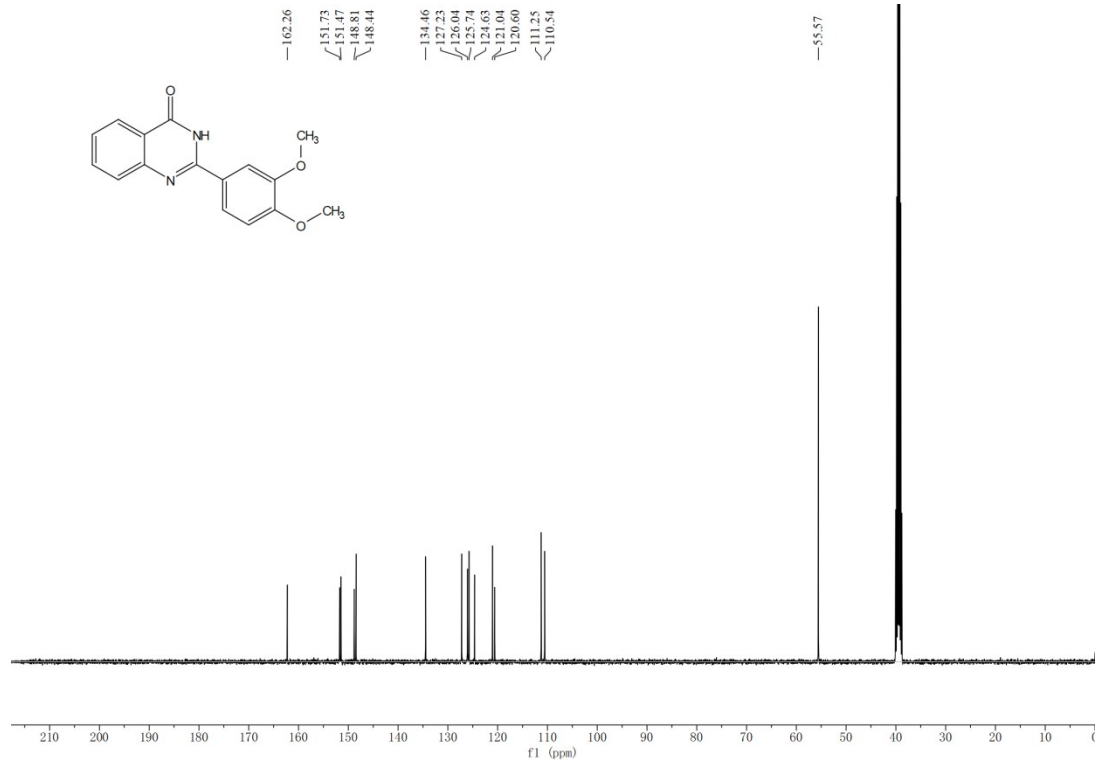

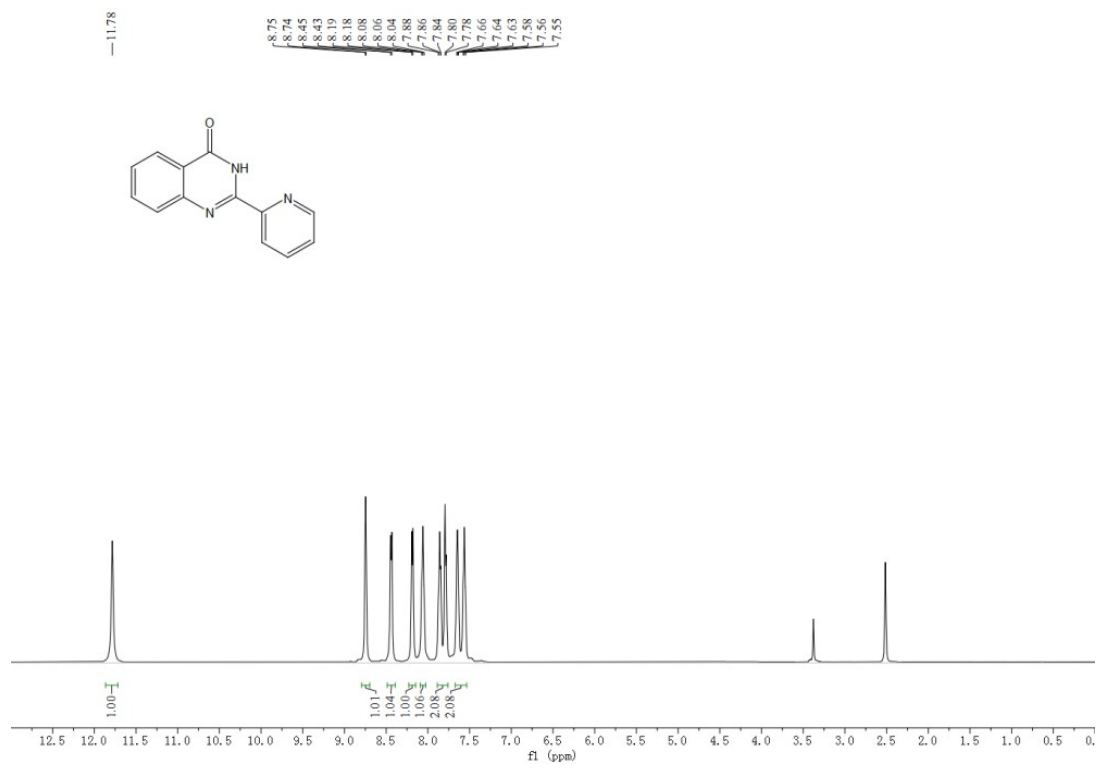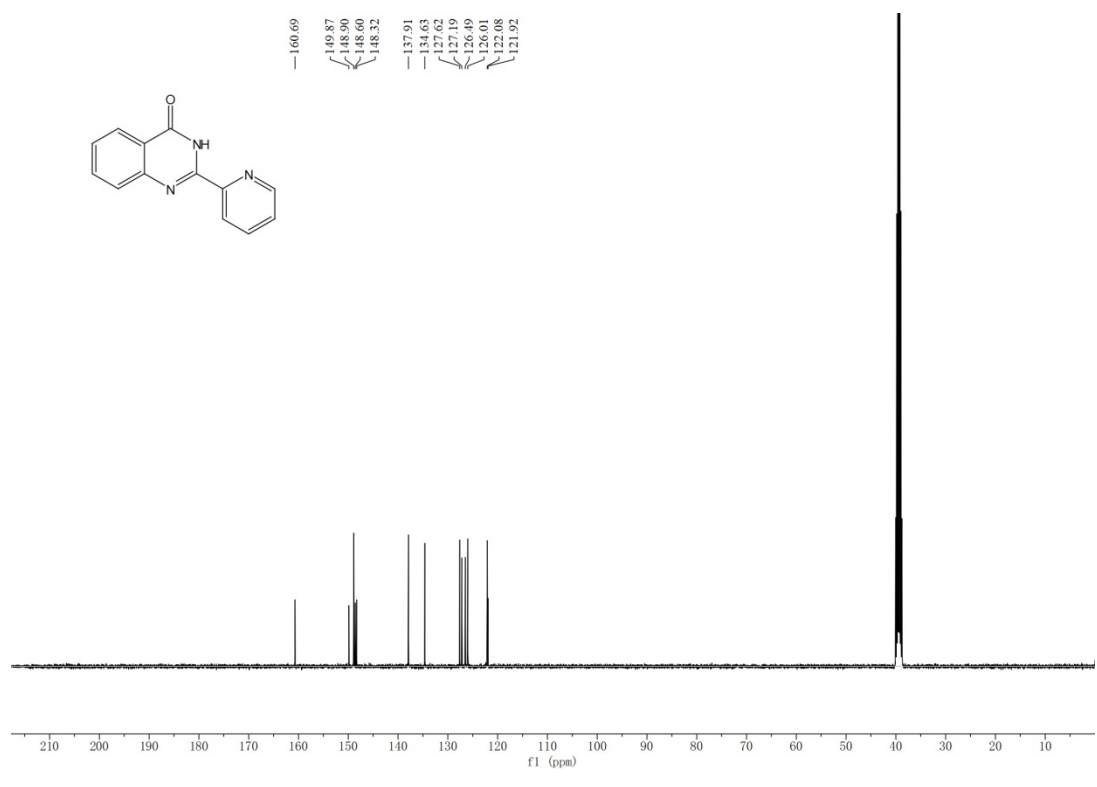

-12.67

8.25  
8.24  
8.14  
8.10  
7.80  
7.88  
7.83  
7.83  
7.81  
7.80  
7.67  
7.66  
7.51  
7.50  
7.48  
7.26  
7.25  
7.24

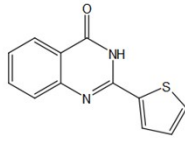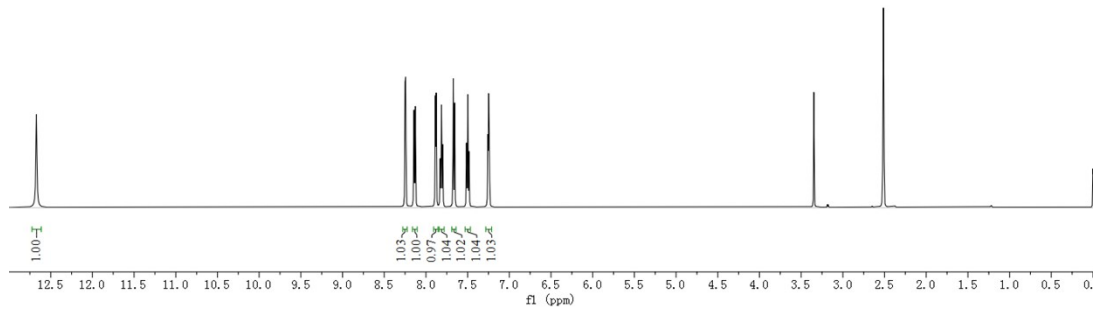

-161.70

148.56  
147.74  
137.29  
136.68  
135.08  
129.32  
128.45  
126.87  
126.25  
125.90  
120.80

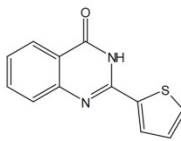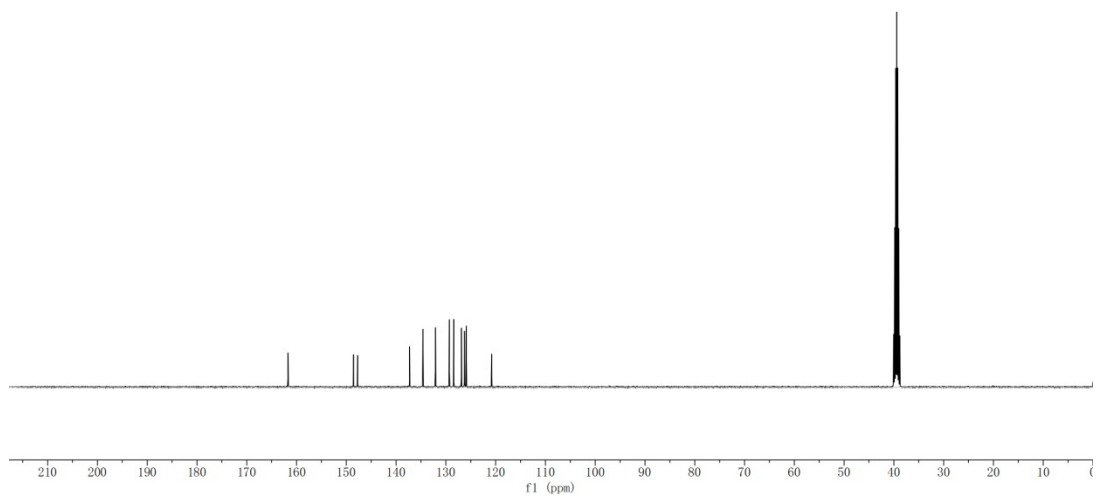

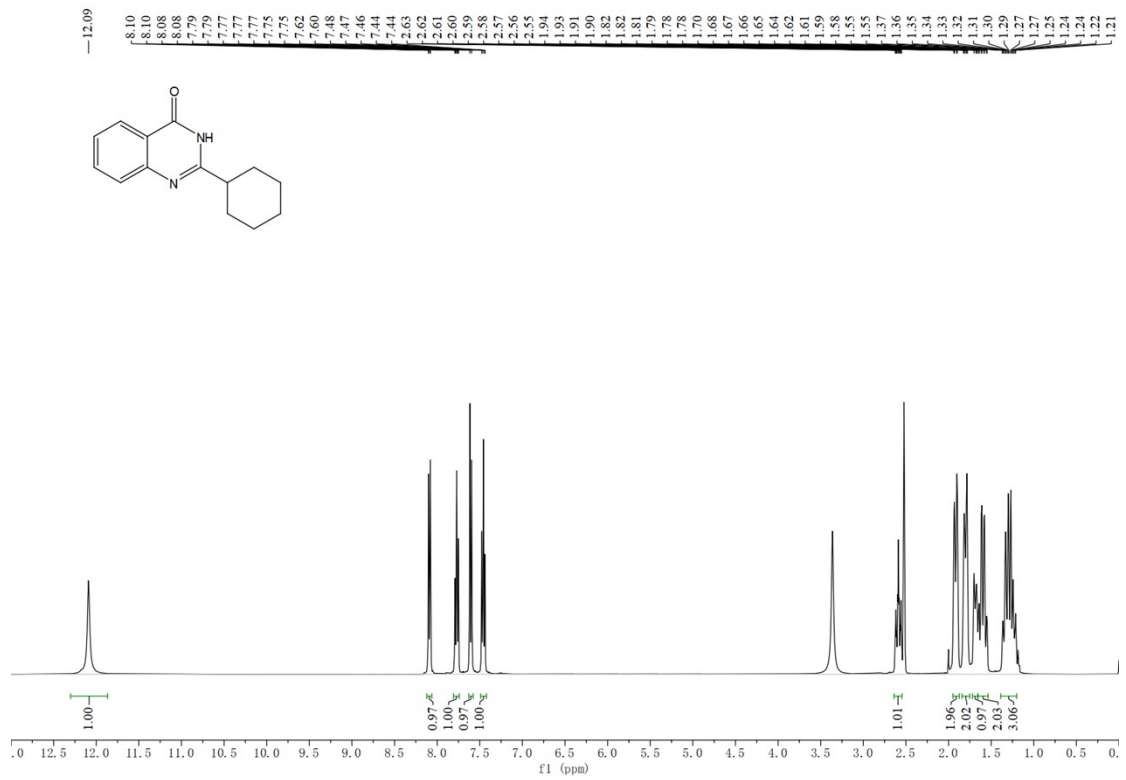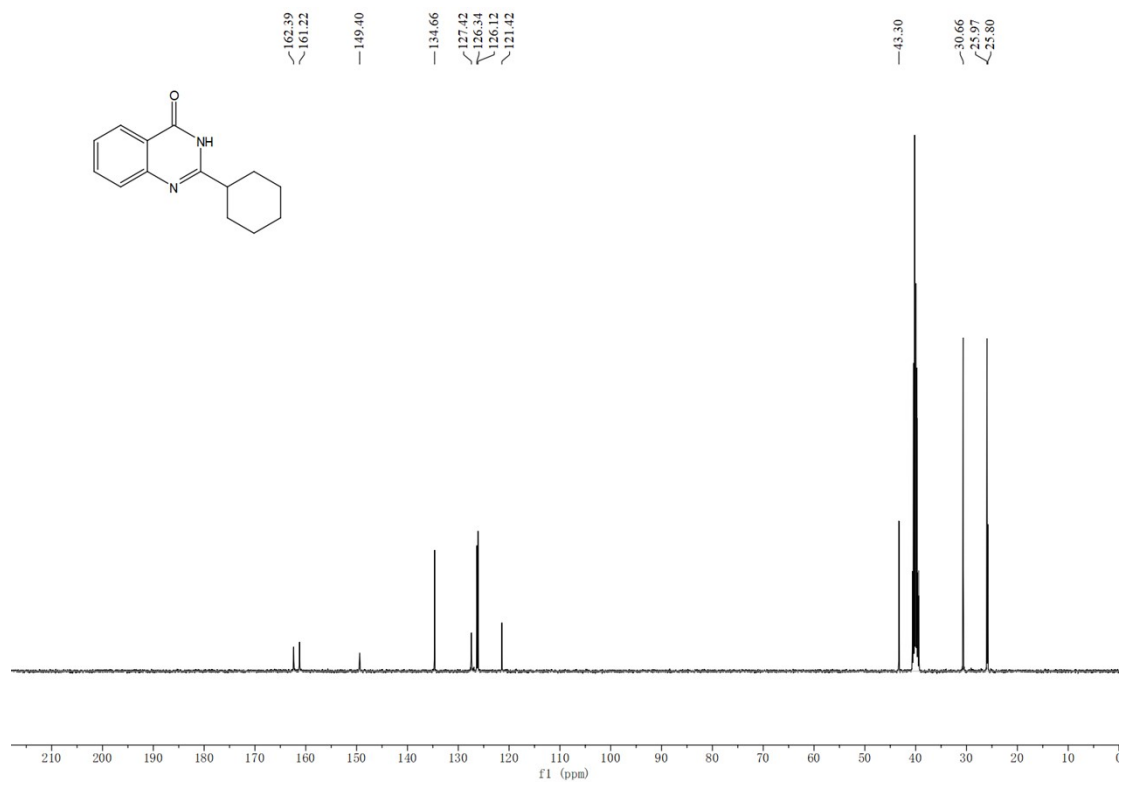



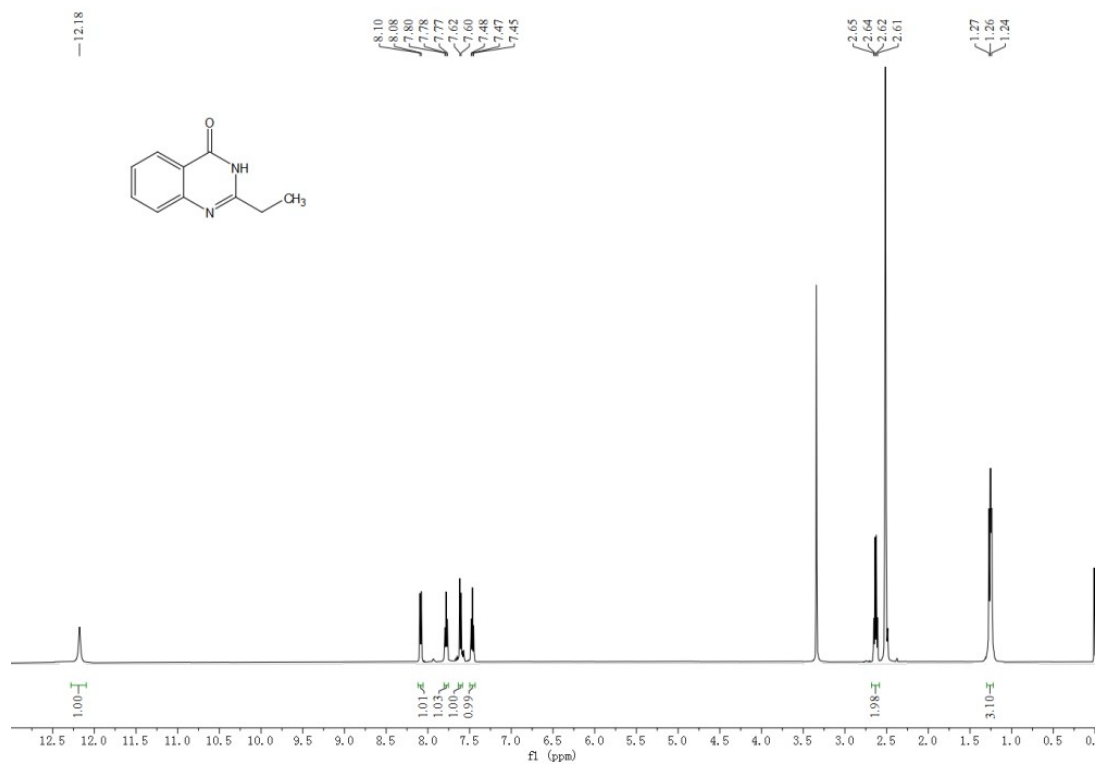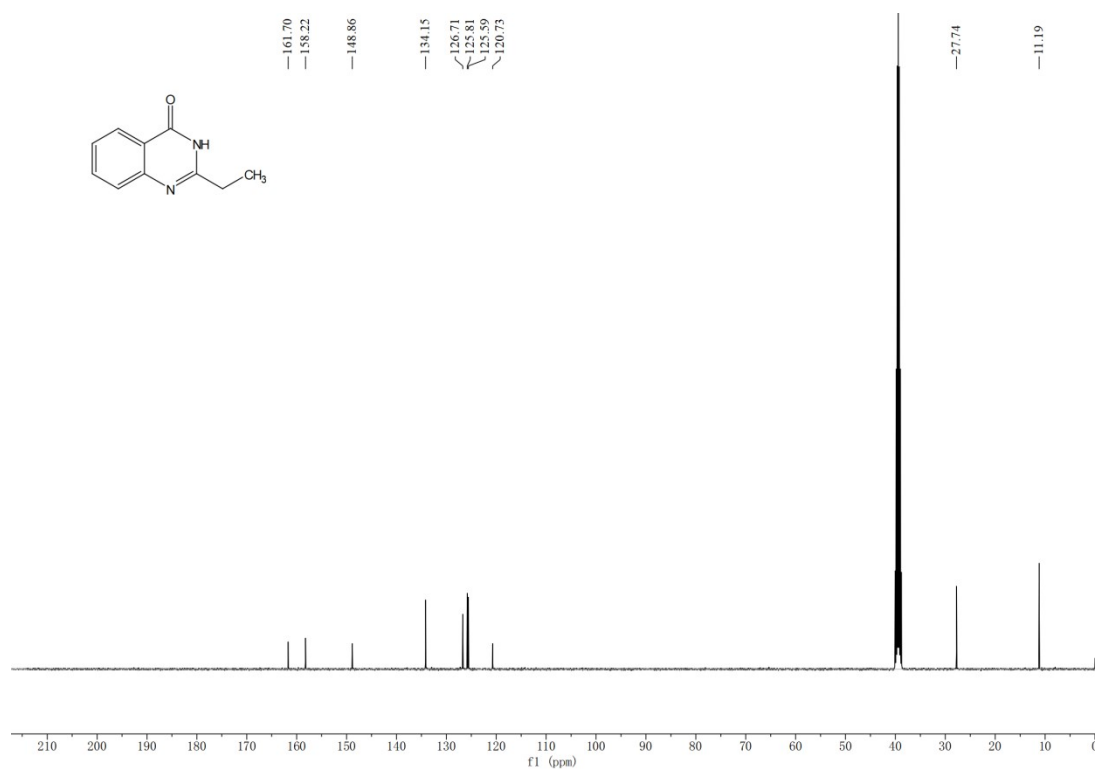

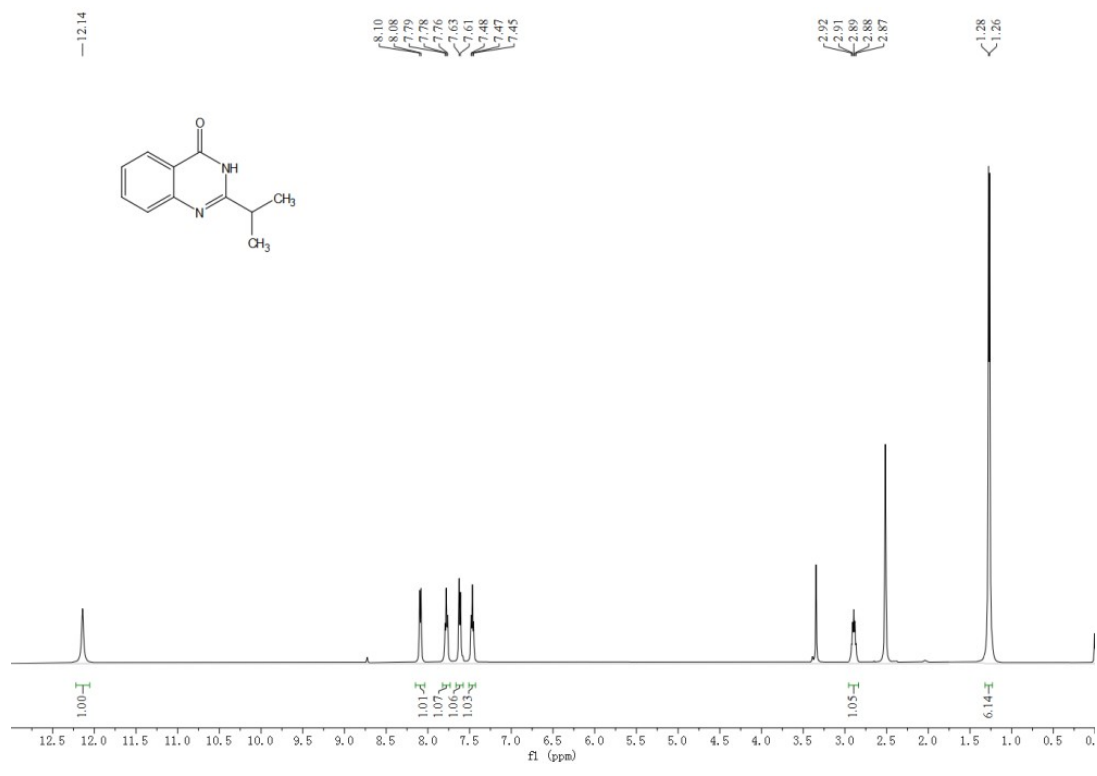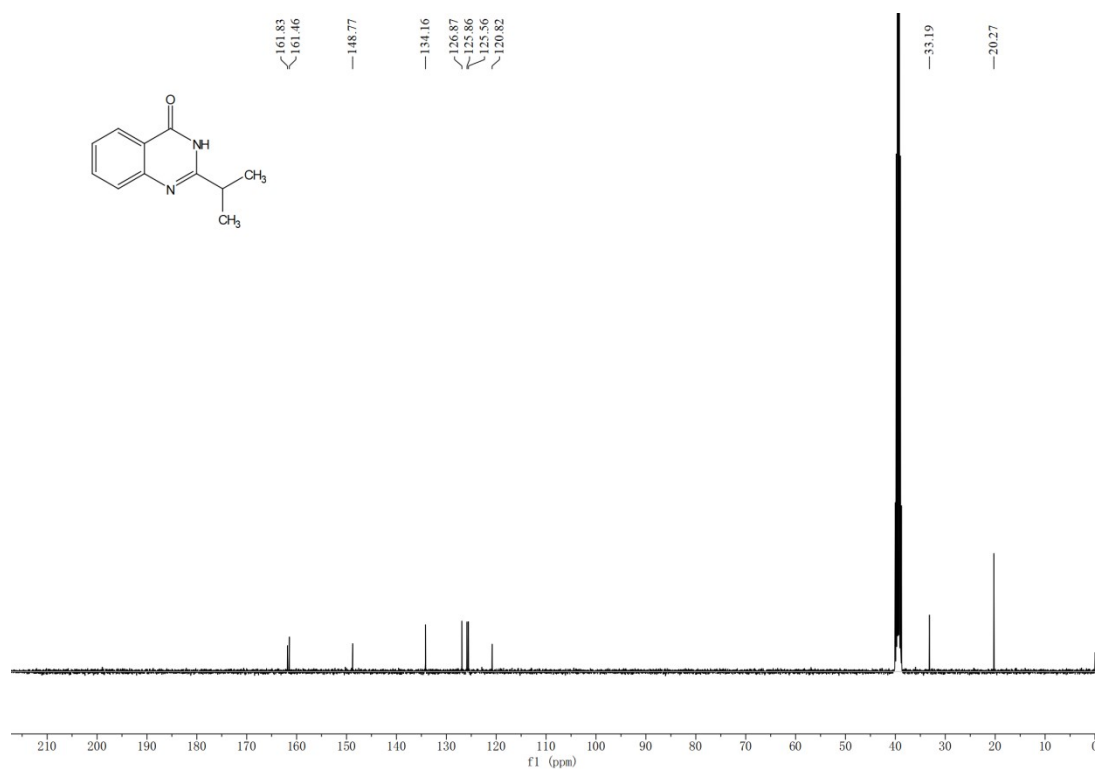

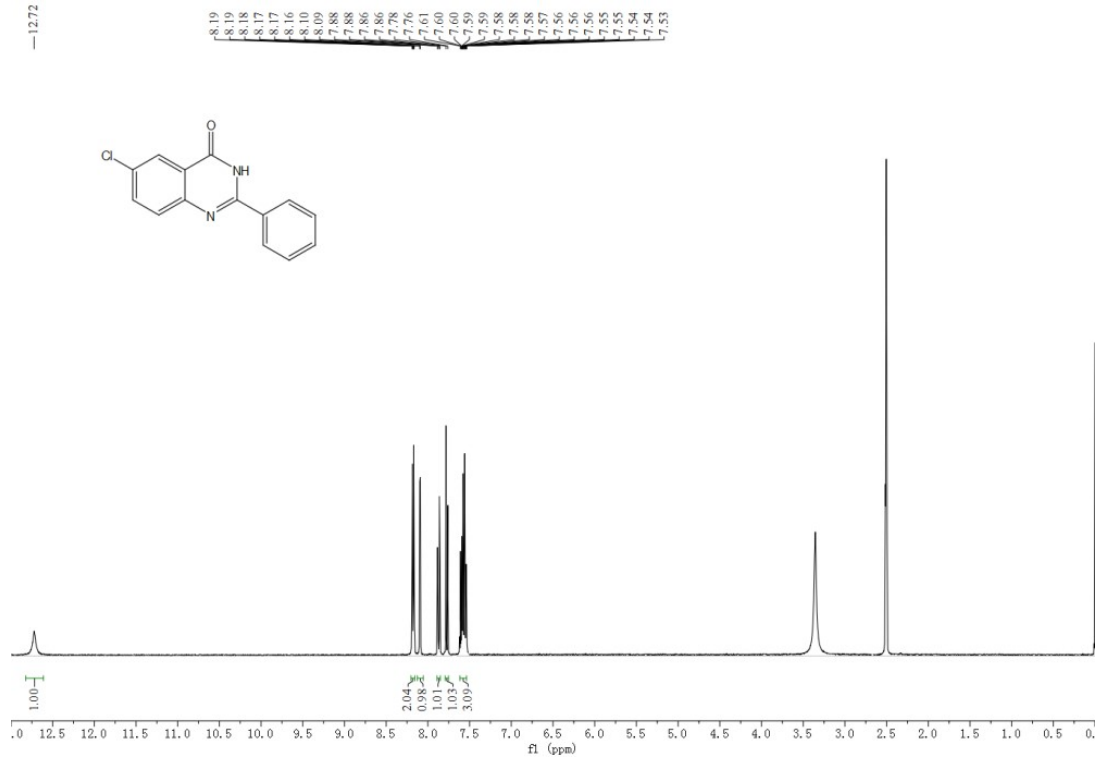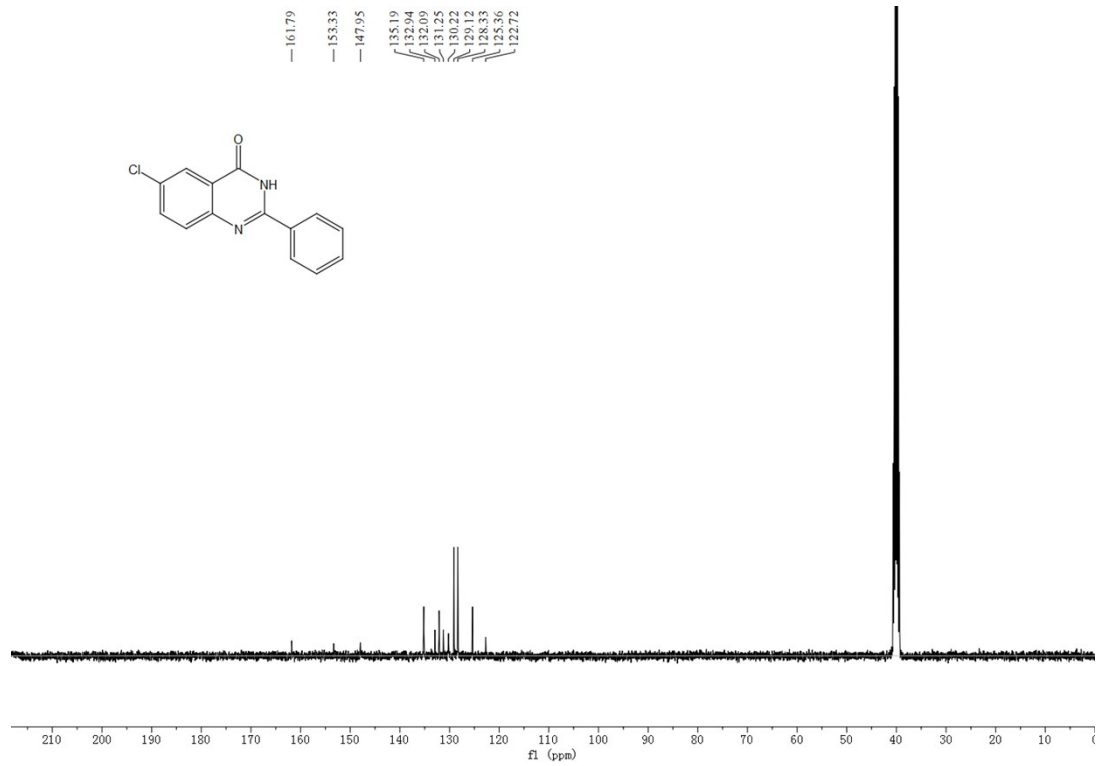

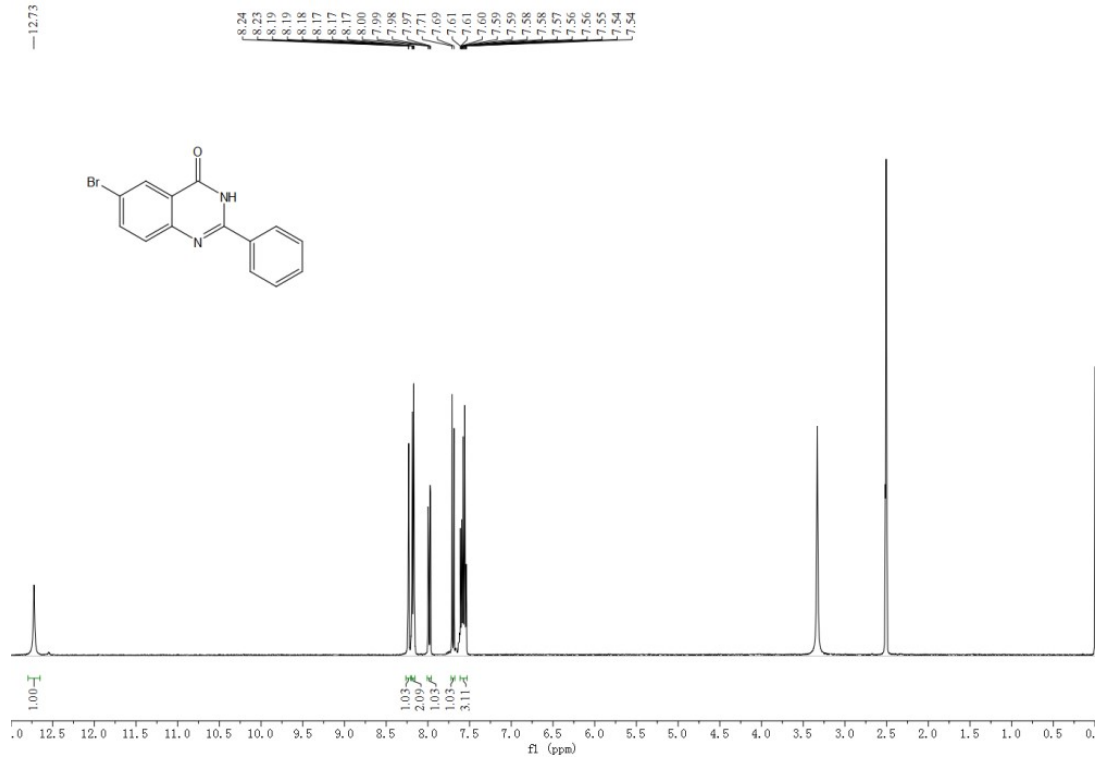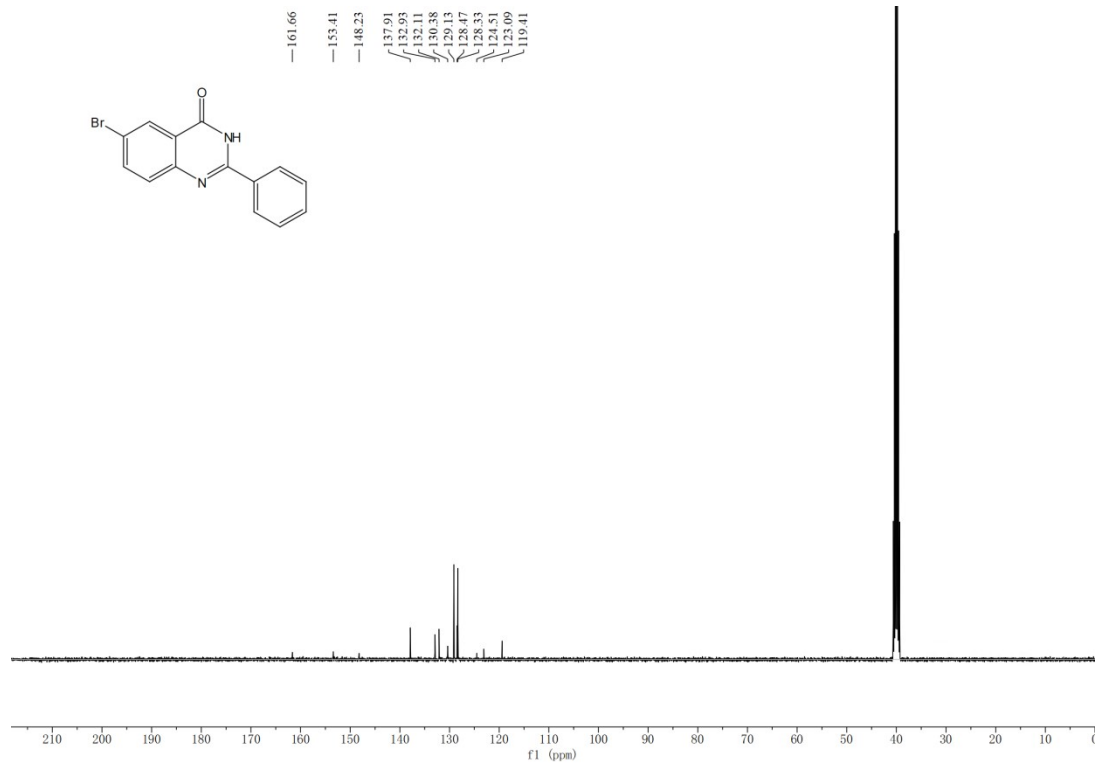

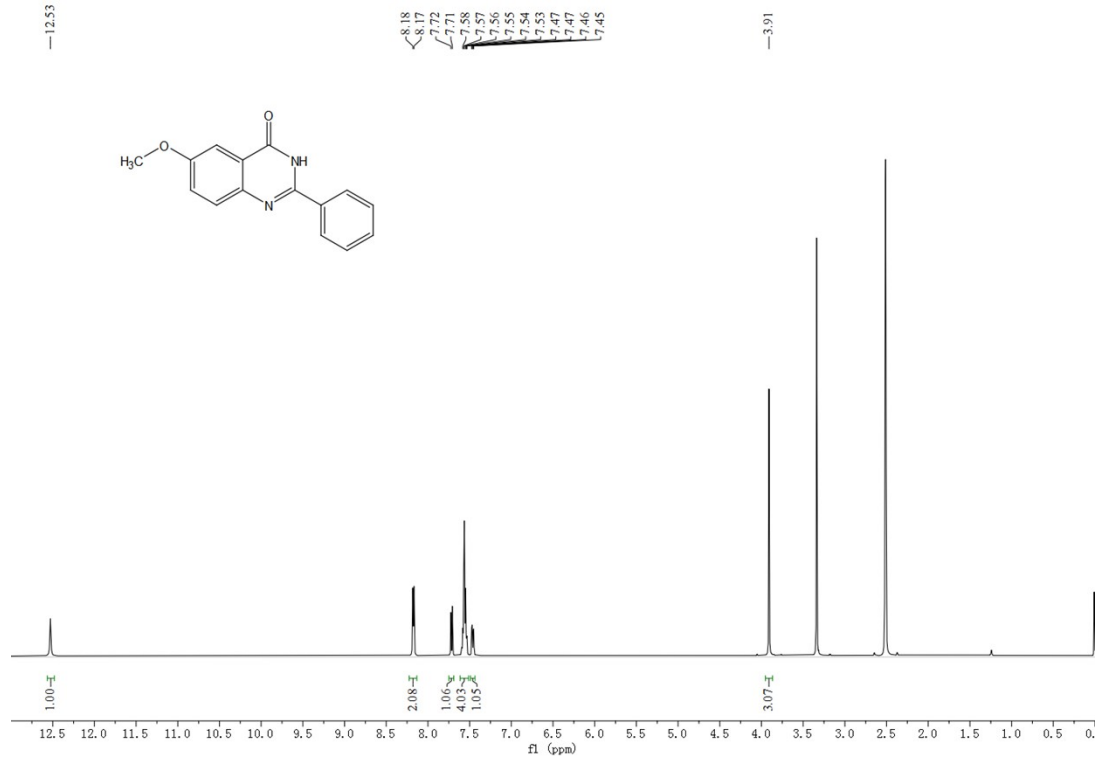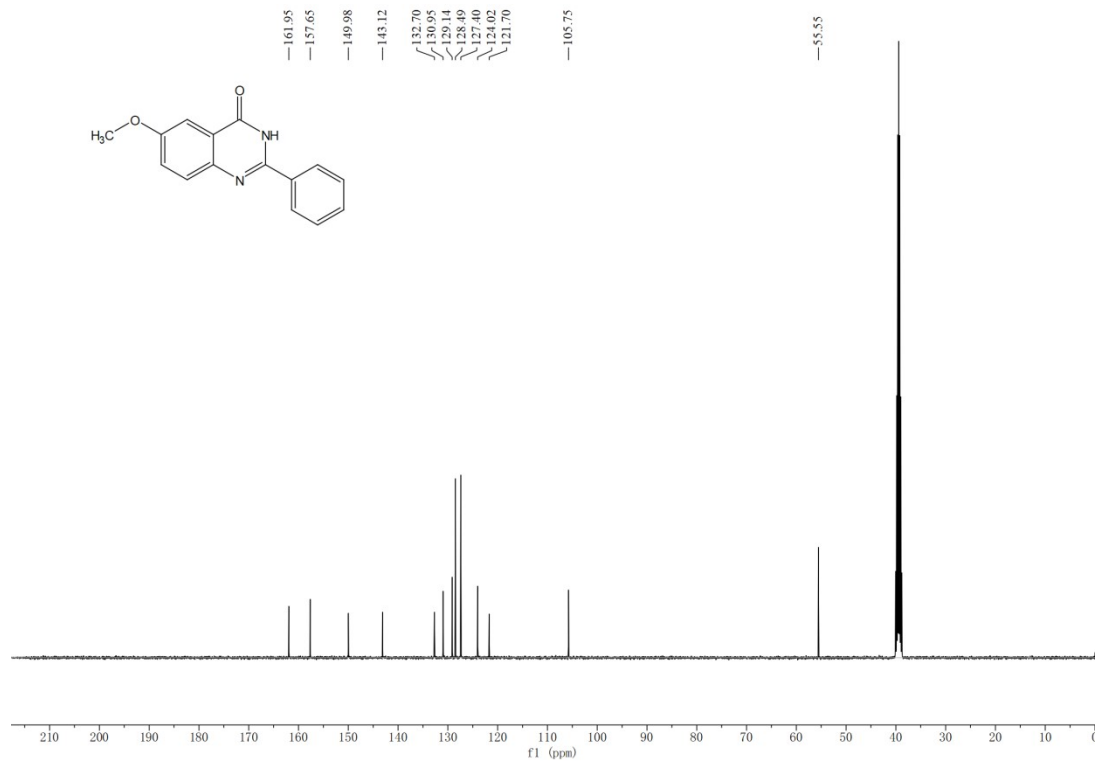

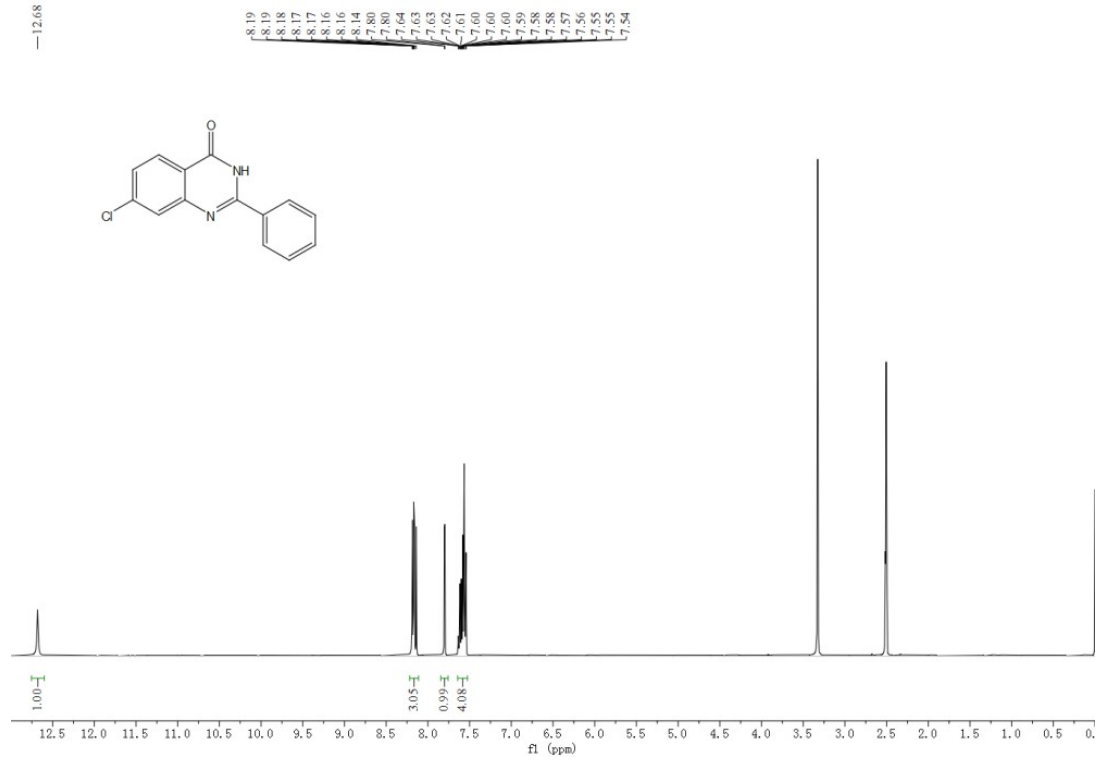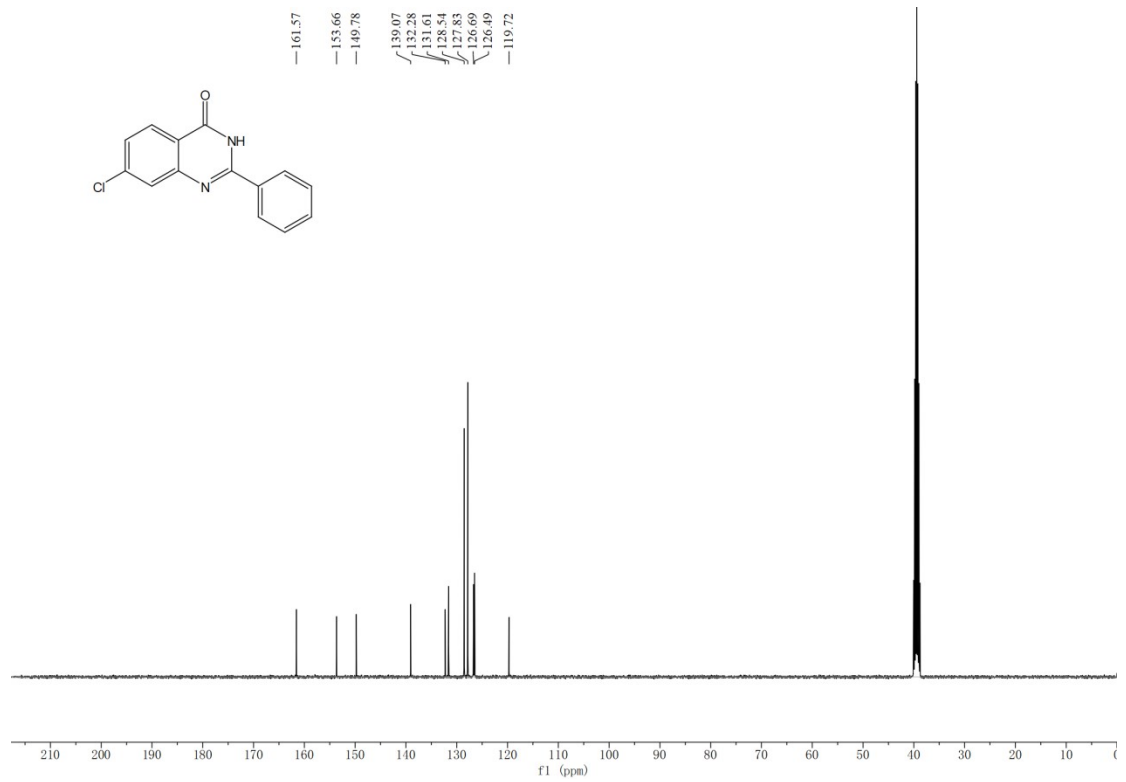

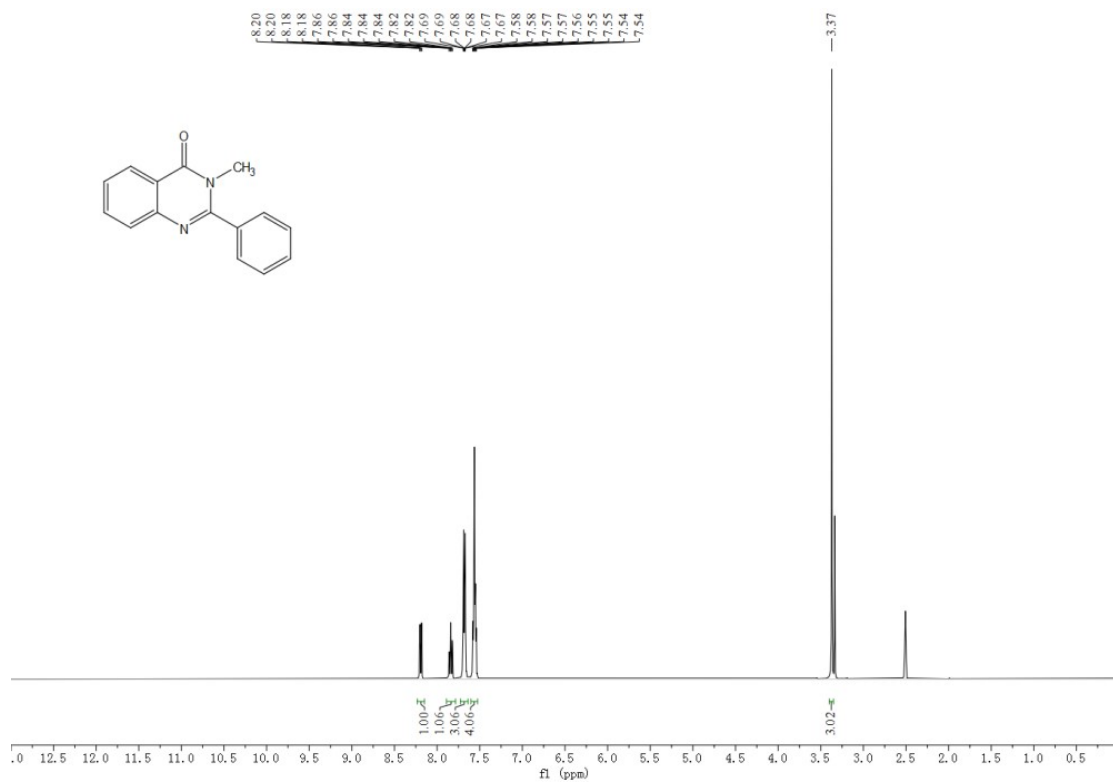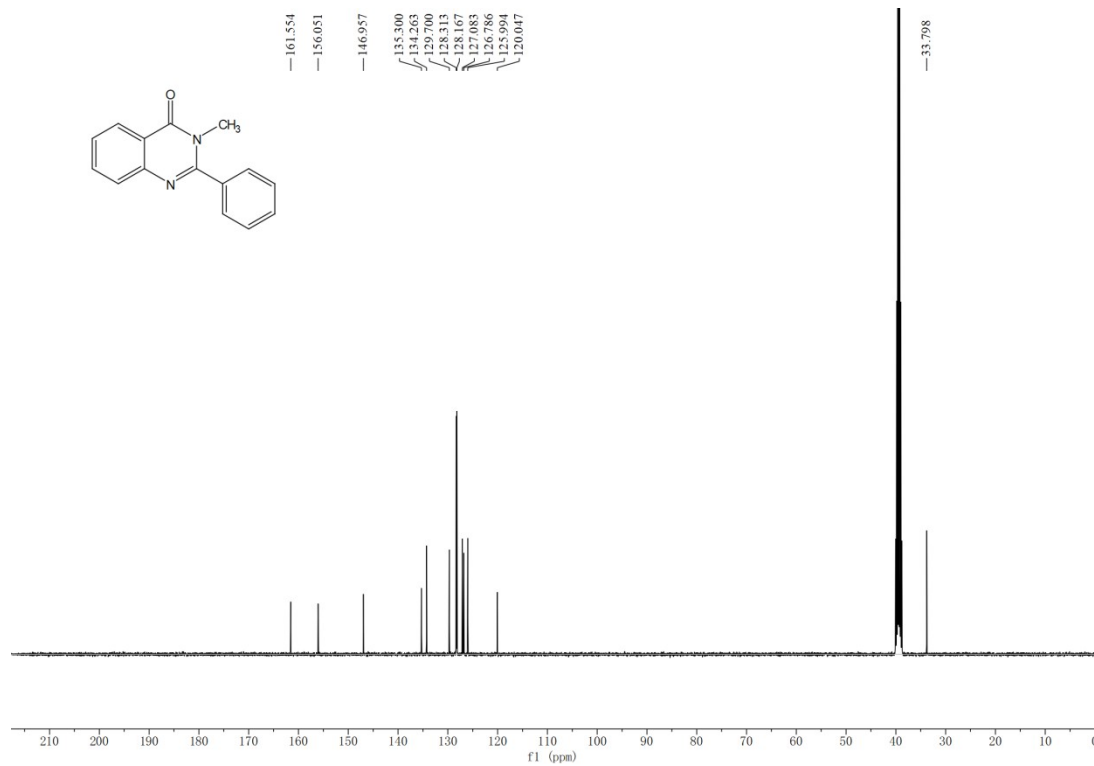

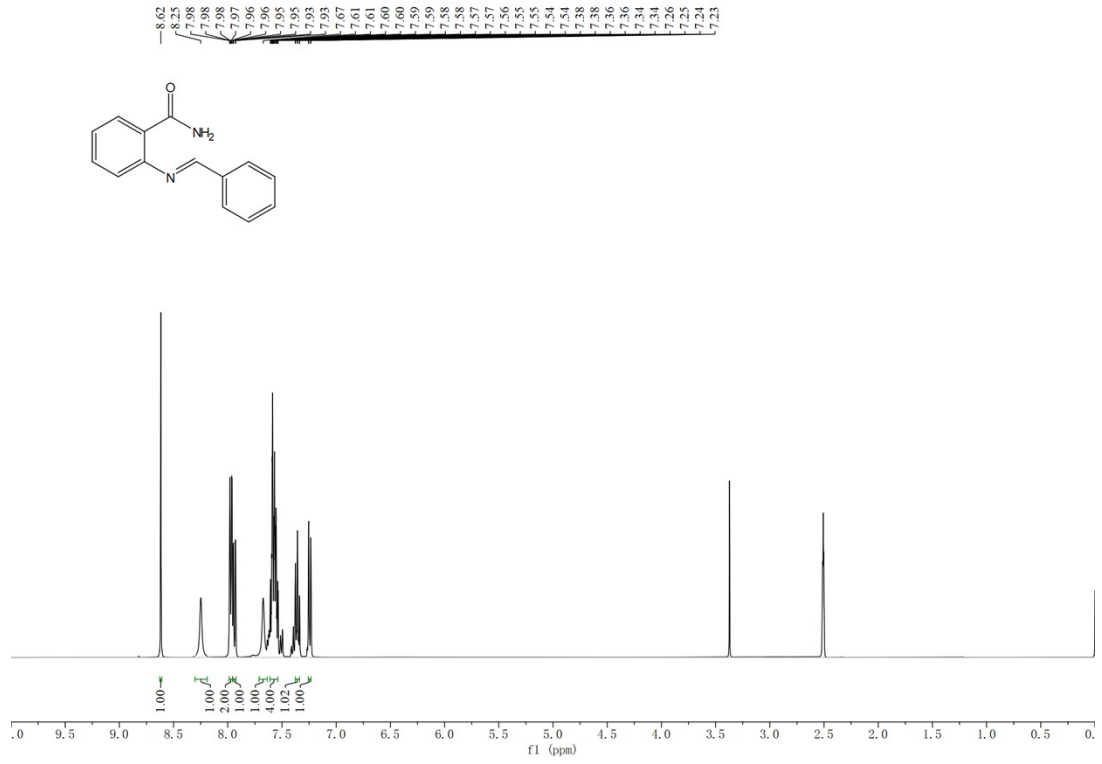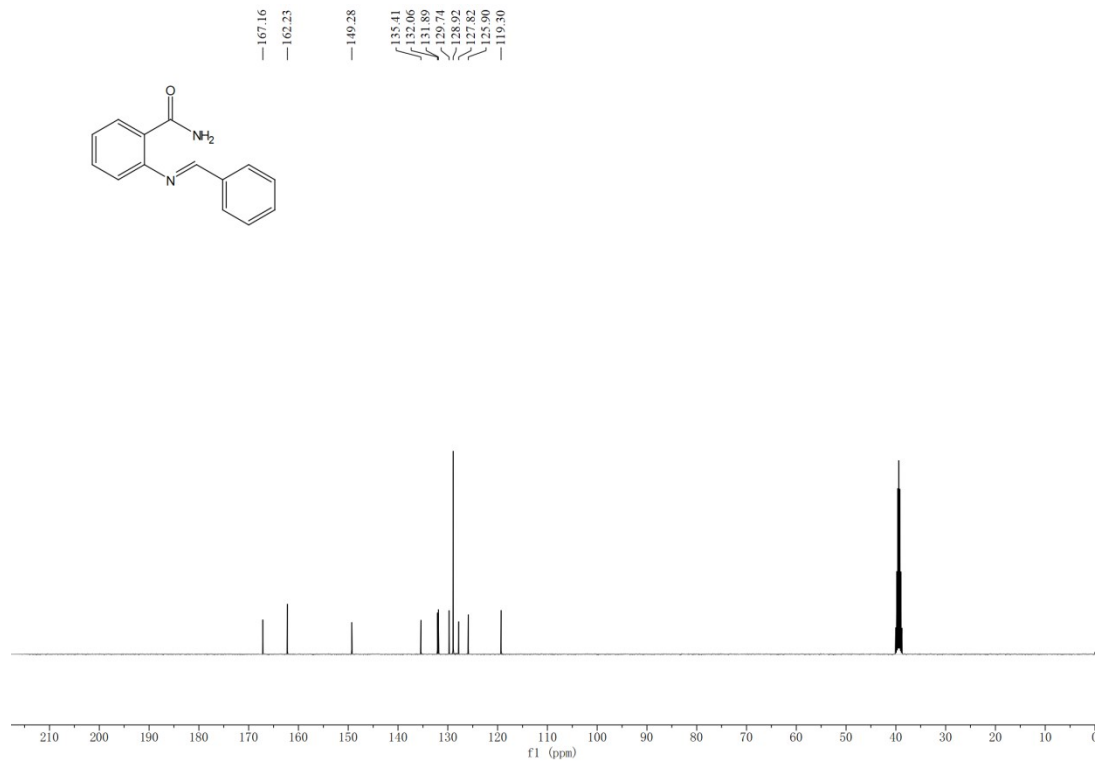

Supplement: d4re00479e1.pdf [file d4re00479e1.pdf]
